# Supplementary material for: Dietary reference values for sodium
Source: PubMed Central journal article supplement (PMC7009309; doi:10.2903/j.efsa.2019.5778), 2019-09-04

Annex to:

EFSA NDA Panel, 2019. Scientific Opinion on Dietary Reference Values for sodium (EFSA-Q-2011-01224). *EFSA Journal* 2019;17(8):5778, 2010 pp. doi: 10.2903/j.efsa.2019.5778

© 2019 European Food Safety Authority. *EFSA Journal* published by John Wiley and Sons Ltd on behalf of the European Food Safety Authority. Annex to:

## **Annex B - Analysis of evidence from published scientific literature as preparatory work for the setting of Dietary Reference Values for Sodium**

European Food Safety Authority (EFSA)

## Summary

The specific objective of the quantitative analysis was to characterise the dose-response relationship between sodium intake and selected health outcomes in the healthy population based on evidence from the published literature; the current report includes a description of the analyses and results addressing the association between sodium urinary excretion and blood pressure, as the evidence identified to answer the other sub-questions as outlined in the protocol was not sufficient to carry out quantitative analyses.

**Methods** - The expected high heterogeneity across the studies identified to characterise the association between sodium intake and blood pressure was taken into account in meta-analyses and meta-regressions applying a random-effects model. Analyses were conducted at two meta-analytic levels: at study level mean BP differences were meta-analysed with the objective to have a term of comparison with respect to other relevant systematic reviews conducted on similar sets of RCTs that investigated how a reduction in sodium intake is associated with a reduction in blood; at arm level mean BP absolute values were meta-analysed and modelled in dose-response meta-regressions to investigate their association with 24-h mean absolute values of urinary Na excretion. Specific formulae (Higgins 2011) were applied to derive summary data where not directly extracted/available in the necessary format. Statistical heterogeneity was tested using the  $\chi^2$  test (Cochran's Q test) and was quantified by calculating the  $I^2$  statistic. Since the expected high level of heterogeneity was confirmed both across studies and arms, possible sources were explored by subgroup analysis, meta-regression and/or sensitivity analysis. Random-effects meta-analyses of summary response measures were carried out using the DerSimonian and Laird approach (DerSimonian et al.1986), which encompasses both sampling variability and variability due to heterogeneity, applying the inverse-variance method. Wald-type 95% confidence intervals were estimated for all summary measures, while in meta-analyses at arm level 95% prediction intervals were approximated by using a  $t$  distribution with  $k-2$  degrees of freedom.

All statistical analyses were performed with STATA version 13.1; all estimates were presented with 95% confidence intervals and all analyses carried out at the level of statistical significance of 0.05.

**Included studies** - Individual trials were included in the analysis as far as they met the following inclusion criteria: trial design was either randomised controlled parallel, cross-over or cluster-randomised; intervention consisted in a change in sodium intake compared to usual diet, no intervention or placebo; subjects involved were adults ( $\geq 18$  years) and children (6 months to  $< 18$  years) from the general population; and sodium intake was assessed based on urinary sodium excretion calculated from single or multiple 24-h urine collection(s). A total of 32 RCTs on adults, providing 35 comparisons, met the eligibility criteria. All arms (68) from the eligible RCTs comparisons were included; there were seven parallel RCTs, including one cluster-randomised trial, and 25 were cross-over RCTs. The between-group differences in mean 24-hour sodium excretion ranged from 13.3 to 285 mmol/day, with a median mean value of 72 mmol/day. The study size ranged from 11 to 1,159 participants and the duration of the intervention lasted from 4 weeks to 36 months. A total of 17 studies involved hypertensive individuals, eight studies involved normotensive individuals and seven studies involved mixed populations. Information about relevant study-level characteristics was not complete; the following were affected by a high proportion of missing data: mean body mass index (BMI) (63%), ethnicity (54%), mean potassium intake at baseline (37%), mean urinary sodium excretion at baseline (31%).

**Study-level pooled estimates** - The random-effect meta-analysis of the 32 eligible RCTs showed overall significant effects of sodium reduction on differences in means of SBP ( $-3.9$  (95% CI:  $-5.1, -2.8$ ) mm Hg;  $I^2$  61.9%,  $p < 0.001$ ; Figure 1: ) and DBP ( $-2.0$  (95% CI:  $-2.8, -1.2$ ) mm Hg;  $I^2$  60.6%,  $p < 0.001$ ; Figure 2: ).

**Arm-level pooled estimates** - The pooled mean estimate across the 68 arms was 137.1 (95% CI: 134.2, 140.1; Figure 3: ) mm Hg for SBP and 84.0 (95% CI: 82.03, 85.9; Figure 4: ) mm Hg for DBP. Heterogeneity was higher than in the study-level instances with an  $I^2$  of 99% ( $p < 0.001$ ) for both SBP and DBP.

**Moderators** – Several factors potentially influencing the dose-response relationships were identified *a priori* both from the literature and by the Panel. Methodological sources of heterogeneity included: study design; specific trial design; trial duration; type of intervention; subject position while measuring BP; number of 24-h urinary collections; risk of bias (overall tier and specific domain); publication year; and funding source. Contextual sources of heterogeneity included: mean age; sex; blood pressure status; BMI; ethnicity; potassium intake at baseline; mean SBP and DBP at baseline; and mean urinary sodium excretion at baseline. A larger effect was found in hypertensive than normotensive individuals, for both SBP (hypertensive:  $-5.6$  (95% CI:  $-8.1, -3.1$ ) mm Hg vs. normotensive:  $-2.0$  (95% CI:  $-3.3, -0.7$ ) mm Hg) and DBP (hypertensive:  $-2.9$  (95% CI:  $-4.2, -1.6$ ) mm Hg vs. normotensive:  $-0.9$  (95% CI:  $-1.6, -0.2$ ) mm Hg). The effect of sodium reduction was higher among subjects aged 50 years or more (SBP  $-6.1$  (95% CI:  $-8.2, -4.1$ ) mm Hg; DBP  $-2.9$  (95% CI:  $-4.0, -1.9$ ) mm Hg) than among subjects younger than 50 years (SBP  $-2.2$  (95% CI:  $-3.3, -1.1$ ) mm Hg; DBP  $-1.0$  (95% CI:  $-2.0, -0.0$ )).

**Dose-response modelling** - A one-stage (or 'pool-first') approach was taken, where study-specific data are combined first and then one summary dose-response model is fitted. Mixed-effects meta-regression models were fitted to account for the multilevel structure in the data, with arms nested within studies; two random effects (intercepts) on arm and study and five fixed effects were specified. The independent variable was centered at 49 mmol/day (minimum mean UNa observed in the data set); for each mixed-effects meta-regression model the statistics  $\tau^2$ , residual  $I^2$  and adjusted  $R^2$  were calculated. Different functional forms were explored for the shape of the dose-response relationship; non-linearities were tested by fitting both restricted cubic splines and linear splines (knot at 130 mmol/day); both splines were no longer statistically significant once both random effects (arms and studies) were specified in the models. Incorporation of the variability around the study intercept into the models helped overcome the 'artefact' deriving from the constraint between the control and intervention groups belonging to the same study.

**Dose-response results** - A total of 60 points (arms as unit of analysis) from 28 RCTs were included in the final dose-response models; fourteen 14 arms were from parallel RCTs, 46 were from cross-over RCTs and none from cluster-randomised trials. The final set of covariates included in both SBP and DBP models was: mean age at baseline (<40 yrs old (ref.), 40-49, 50-59,  $\geq 60$  yrs old); blood pressure status at baseline (normotensive (ref.) hypertensive); mean urinary sodium excretion at baseline (<100 mmol/day (ref.), 100-149,  $\geq 150$  mmol/day); blood pressure measurement method (supine (ref.), sitting); and specific trial design (no run-in (ref.), run-in normal diet, run-in low sodium diet. For each 100 mmol/day increase in mean urinary sodium excretion, holding all other covariates constant, mean systolic blood pressure increased linearly by 5.3 mm Hg (95%CI: 3.6-6.9 mm Hg) and mean diastolic blood pressure increased linearly by 2.6 mm Hg (95%CI: 1.6-3.7 mm Hg). Mean sodium excretion explained only 4% of the heterogeneity across trials arms in the SBP model and 3% in the DBP model; however, in both models the set of moderators explained more than 85% of the between-study heterogeneity. In stratified analyses a larger association was found in hypertensive than normotensive individuals, for both SBP (hypertensive: 6.4 (95% CI: 4.3, 8.6) mm Hg vs normotensive: 4.4 (95% CI: 2.1, 6.6) mm Hg) and DBP (hypertensive: 3.7 (95% CI: 2.5, 5.0) mm Hg vs normotensive: 1.7 (95% CI: 0.1, 3.3) mm Hg). The effect of sodium was higher among subjects aged 50 years or more (SBP 7.1 (95% CI: 5.0, 9.2) mm Hg; DBP 3.8 (95% CI: 2.6, 5.0) mm Hg) than among subjects younger than 50 years (SBP 3.5 (95% CI: 1.5, 7.4) mm Hg; DBP 1.2 (95% CI:  $-0.4, 2.9$ ). The potential moderating effect of K, BMI, and ethnicity could not be explored due to lack of information; sex showed some variability across subgroups in meta-analyses on trials, but the effect was not replicated in models on arms.

**Uncertainties** - Sources of uncertainty specific to the statistical analysis and their potential impact on the final estimates, where possible, were identified and described to inform the overall assessment of the uncertainty in the body of evidence. Among them: the strong 'methodological' component (covariates that were linked to the experimental setting) that explained a large part of the heterogeneity between studies (random effects) introduced specific challenges to model interpretation; the use of data generated in controlled settings to characterise the sodium-blood pressure relationship was not optimal as the experimental setting was broken to conduct an « observational » type of analysis (with paired points); important moderators were not explored (e.g. BMI, ethnicity, potassium intake and energy intake) due to missing information; the models did not take into account the high

inter-individual and intra-individual variability of sodium excretion and BP measurements; meta-regressions modelled the relationship between mean Na and mean BP at 'group' level, being observational in nature and possibly different when explored on individual data (aggregation bias). Publication bias was assessed by visual inspection of the contour funnel plot and by performing the Egger's test for funnel plot asymmetry on mean differences in SBP from the 32 RCTs included in the meta-analyses; the test was statistically significant ( $p = 0.001$ ), but publication bias was not considered a likely explanation for the asymmetry since the studies effects spread across all areas of significance.

## Table of contents

|                                                                                       |    |
|---------------------------------------------------------------------------------------|----|
| Summary .....                                                                         | 2  |
| Background.....                                                                       | 6  |
| Synthesis of the evidence .....                                                       | 7  |
| 1. Criteria under which study data were quantitatively synthesised .....              | 7  |
| 2. Summary measures .....                                                             | 7  |
| 3. Unit of analysis issues .....                                                      | 8  |
| 4. Dealing with missing data.....                                                     | 8  |
| 5. Assessment of heterogeneity .....                                                  | 9  |
| 6. Data checking.....                                                                 | 9  |
| 7. Meta-analyses.....                                                                 | 9  |
| 7.1. Studies and arms included in the meta-analyses .....                             | 9  |
| 7.2. Overall summary effects.....                                                     | 10 |
| 7.3. Subgroup analyses, investigation of heterogeneity between studies and arms ..... | 15 |
| 8. Dose-response models .....                                                         | 16 |
| 8.1. Trials arms included in the dose-response models.....                            | 16 |
| 8.2. Models specification .....                                                       | 17 |
| 8.3. Model diagnostics.....                                                           | 17 |
| 8.4. Dose-response moderators .....                                                   | 18 |
| 8.5. Dose-response models results.....                                                | 18 |
| 9. Addressing risk of bias in the analysis.....                                       | 23 |
| 10. Sensitivity Analyses .....                                                        | 23 |
| 11. Publication bias.....                                                             | 23 |
| 12. Analysis uncertainties .....                                                      | 24 |
| References.....                                                                       | 25 |
| Appendix A - Trials main characteristics .....                                        | 27 |
| Appendix B – Trial arms summary data.....                                             | 30 |
| Appendix C - Outcome of RCTs RoB assessment .....                                     | 32 |
| Appendix D - Summary of meta-analyses results at study-level .....                    | 33 |
| Appendix E - Dose-response models: diagnostics and fitting .....                      | 37 |
| Appendix F - Sensitivity analyses.....                                                | 40 |
| Appendix G - Funnel plots.....                                                        | 42 |
| Appendix H - Forest plots at study level: subgroup analyses .....                     | 43 |
| Appendix I - Forest plots at arm level: subgroup analyses.....                        | 87 |

## Background

The scientific opinion that addresses the Dietary Reference Values (DRVs) for sodium was conducted in accordance with the NDA Panel's Scientific Opinion on principles for deriving and applying DRVs; some parts of the assessment were undertaken by applying the 4-step approach for evidence use (i.e. plan/carry out/verify/report) described in the EFSA report on principles and process for dealing with data and evidence (the "Prometheus approach") (EFSA, 2015).

The current report was drafted based on: section 3 of the protocol (and related amendments) for sections 5.5 and 6 of the scientific opinion on DRVs for sodium by the NDA WG on Dietary Reference Values for Vitamins (thereafter referred to as "the Prometheus protocol"); the SAP (Statistical Analysis Plan) drafted as an internal document; and the actual analysis carried out consistently with the plan.

The specific objective of the quantitative analysis was to characterise the dose-response relationship between sodium intake and selected health outcomes in the healthy population based on evidence from the published literature. Its results informed section 5.5 of the scientific opinion, which also describes the systematic review steps preliminary to the meta-analyses and meta-regressions, as planned in the Prometheus protocol (literature searches, screening for relevance, risk of bias assessment).

## Synthesis of the evidence

Three categories of health outcomes were selected as the most suitable to inform the setting of DRVs: blood pressure, cardiovascular disease related endpoints and bone health (section 2 of the Prometheus protocol). Systematic reviews of the scientific literature were conducted to characterise the relationship between sodium intake and these outcomes.

The characteristics of eligible studies and the outcome of the risk of bias (RoB) assessment are summarized in evidence tables in the Appendices H to L of the scientific opinion. According to the eligibility criteria, 24-h urinary excretion of sodium was used as a marker of sodium intake.

### 1. Criteria under which study data were quantitatively synthesised

The current report includes a description of the analyses and results addressing the **association between sodium urinary excretion and blood pressure (sub-question 1, part 1)**, as the evidence identified to answer the other sub-questions was not sufficient to carry out quantitative analyses (see sections 5.5.1 to 5.5.3 in the scientific opinion). For the latter, results from the available individual studies (including original dose-response analyses) were either discussed narratively or displayed in forest plots, but neither pooling nor modelling were possible/deemed appropriate (small and heterogeneous bodies of evidence).

The expected high heterogeneity across the studies identified to characterise the association between sodium intake and blood pressure was taken into account in meta-analyses and meta-regressions applying a random-effects model; such a model assumes that the true effects are normally distributed around a pooled weighted mean (or around the linear predictor for models) and allows for residual heterogeneity among responses not otherwise characterised by subgroups analyses (or not modelled by the explanatory variables included in the multivariable models).

Analyses were conducted at two meta-analytic levels, study and arm (i.e. intervention group from trial): at study level mean BP differences were meta-analysed with the objective to have a term of comparison with respect to other relevant systematic reviews conducted on similar sets of RCTs that investigated how a reduction in sodium intake is associated with a reduction in blood pressure (e.g. He et al. 2013, WHO 2012, Graudal 2017, AHRQ 2018); at arm level mean BP absolute values were meta-analysed and modelled in dose-response meta-regressions to investigate their association with 24-h mean absolute values of Na urinary excretion.

All statistical analyses were performed with STATA version 13.1. All estimates were presented with 95% confidence intervals and all analyses carried out at the level of statistical significance of 0.05.

### 2. Summary measures

In study-level meta-analyses, both systolic blood pressure (SBP) and diastolic blood pressure (DBP) were analysed as differences in means between trial arms. Mean differences with related standard errors were calculated based on summary data extracted from the original individual studies: the number of participants included (and assessed) in each arm of each RCT; and means and standard deviations of the baseline and end of trial values in intervention and control arms (at each time point and for each sodium intake level).

In arm-level meta-analyses, SBP and DBP were analysed as mean absolute values for each arm (end of trial); their related standard errors were calculated from the available summary data.

Summary mean differences and summary mean absolute values (with 95% CI) were estimated by pooling the study- or arm- specific means, assuming a random-effects model and applying the inverse-variance method.

Only measurements at the last available time point from each study were analysed; the planned sensitivity analyses on the sub-set of measures taken at 4 weeks were not carried out because of lack of time.

### 3. Unit of analysis issues

All included trials were assessed in order to check whether the unit of randomization was consistent with the unit of analysis.

The only cluster-randomised trial results (Alli 1992) were included as such in the study- and arm- level meta-analyses and were not retained in the dose-response analysis, because of consistency and reliability issues in the study design and analysis (see Appendix B – Arms data and Appendix C - RoB table).

Cross-over trials were analysed with consideration of the potential related design issues. Since arm estimates were used as points in subsequent arm-level analyses, study estimates were calculated from summary data as reported in the original papers and used in the study-level meta-analyses with no attempt to reproduce paired analyses (Higgins 2011). This might have possibly caused some underweighing of the effects from cross-over trials; however, estimates from cross-over studies were systematically larger than parallel ones (see related subgroup analyses in Appendix H).

Responses from the sodium intake arms available from a study were included as long as the arms fell into different intake range subgroups. Two trials (MacGregor 1989 and Sacks 2001) had three intervention groups; the size of the control group, which was common to the two comparisons per study, was divided by two in order to have reasonably independent comparisons. In arm-level meta-analyses and meta-regressions the standard errors were calculated based on the original group size, as each arm contributed as an independent point; however, correlations across arms from the same study were taken into account in the meta-regression models.

### 4. Dealing with missing data

Specific formulae (Higgins 2011) were applied to derive summary data where not directly extracted/available in the format of the statistics mentioned in section 1.2 (e.g. standard deviations were calculated either from standard errors and group size or from confidence intervals). If no calculation/estimation was possible, the missing data were imputed based on information in the same trial; if available, standard deviations were imputed from other time points values, otherwise from other groups from the same study (Furukawa 2006).

Information about relevant study-level characteristics was moderately complete. The following were affected by a high proportion of missing data: mean body mass index (BMI) (63%), ethnicity (54%), mean potassium intake at baseline (37%), mean urinary sodium excretion at baseline (31%) (Appendix D, Table 3 and Table 4).

Energy intake was extracted as a potential moderator of interest (Na density may reflect the relationship with blood pressure better than absolute Na intake) but information was almost always missing in the original reports.

Blood pressure measurement position was not reported in two trials (Schorr 1996; van Berge-Landry 2004), where it was assumed to be 'sitting' for the subsequent analyses. For Puska 1983, a 50% proportion of female subjects was assumed.

Blood pressure at baseline was missing in 7 trials; an attempt was made to maximise information by categorising it according to mean values, where available, and individual study eligibility criteria (hypertensive; normotensive). The same exercise was not extended to baseline DBP as deemed not useful, so both moderators were subsequently included in models as continuous variables.

Availability of mean BMI information in the final dataset was maximised by using supporting information from the original papers; a categorical variable was created based on the mean values, where available, and individual study eligibility criteria (normal weight, overweight, obese); the missing data proportion in the new variable dropped to 54% and since it was considered inconsistent it was not further analysed as such. While developing the final model BMI missing data were included in a specific category as 'not reported', to be able to compare models with and without BMI as a covariate (i.e. assuring same number of arms in all models).



Baseline potassium intake, ethnicity and UNa at baseline were analysed likewise, although the high proportion of missing values for ethnicity and potassium prevented them from being included in the final models.

Limited attempts to contact the original authors of the individual studies were made to obtain relevant missing data. Mean age at baseline in completed years was retrieved for 4 trials (Dickinson 2014; Santos 2010; van Berge-Landry 1996; ANHMRCDs 1989) out of the original 6 missing it. The 2 trials without were excluded from the final set of the dose-response analyses but were retained in the other analyses as information on mean age was at least available as either younger or older than 50 years old.

## 5. Assessment of heterogeneity

Statistical heterogeneity was tested using the  $\chi^2$  test (Cochran's Q test) and was quantified by calculating the  $I^2$  statistic.  $I^2$  provides an estimate of the proportion of between-study variability that is attributed to heterogeneity rather than chance (Higgins 2002).

$I^2$  ranged between 0% and 85% in SBP study-level meta-analyses and 0% and 83% in DBP study-level meta-analyses; in arm-level meta-analyses it ranged between 0% and 99% for both SBP and DBP.

Since the expected high level of heterogeneity was confirmed both across studies and arms, possible sources were explored by subgroup analysis, meta-regression and/or sensitivity analysis.

## 6. Data checking

For each variable, the proportion of missing observations was calculated, and range checks carried out to ensure that all values were plausible. The distributions of continuous variables were explored graphically, and the frequency distributions of categorical variables tabulated. Key variables were cross-tabulated or scattered against each other to check for consistency. Summary data were double checked against original publications whenever deemed necessary, and unit conversions of all included urinary sodium excretion values carried out where requested (mg/day converted to mmol/day by dividing by 23).

## 7. Meta-analyses

Random-effects meta-analyses of summary response measures were carried out using the DerSimonian and Laird approach (DerSimonian 1986), which encompasses both variability due to chance (i.e. the within-study variance component in the denominator of the individual study weight) and variability due to heterogeneity (i.e. the between-study variance component added in the denominator of the individual study weight – tau-squared statistic).

Tau-squared ( $\tau^2$ ) was estimated using the DerSimonian-Laird method (DerSimonian 1986); Wald-type 95% confidence intervals were estimated for all summary measures.

In meta-analyses at arm level 95% confidence intervals of the approximate predictive distribution of a future trial, based on the extent of heterogeneity (95% prediction intervals), were estimated. Prediction intervals incorporate uncertainty in the location and spread of the random effects distribution and were approximated by using the formula  $\text{mean} \pm t_{df} \times \text{sqrt}(\text{se}^2 + \tau^2)$ , where  $t$  is the appropriate centile point (95%) of the  $t$  distribution with  $k-2$  degrees of freedom,  $\text{se}^2$  is the squared standard error and  $\tau^2$  the heterogeneity statistic.

When studies in the specific subgroups were less than 3 the distribution was inestimable and effectively infinite, thus displayed with dotted lines; also, where heterogeneity was zero the prediction intervals were still slightly wider than the confidence intervals as the  $t$ -statistic is always greater than the corresponding normal deviate (Higgins and Thompson 2001).

### 7.1. Studies and arms included in the meta-analyses

The mean SBP and DBP responses measured as differences in means between same trial arms (study-level meta-analyses) and as achieved absolute means in both placebo/control and intervention groups

(arm-level meta-analyses) were included in the analyses as long as the related individual trials met the following inclusion criteria:

- trial design was either randomised controlled parallel, cross-over or cluster-randomised (with a wash-out period of any duration)
- the intervention consisted in a change in sodium intake compared to usual diet, no intervention or placebo; trials with concomitant interventions deemed to affect the outcome of interest were excluded
- subjects involved were adults ( $\geq 18$  years) and children (6 months to  $< 18$  years) from the general population; trials including diseased individuals, individuals on a therapeutic diet (including weight loss diet), hypertensive subjects on blood pressure-lowering medications, trials in pregnant women and trials with specialised exercise (e.g. athletes, militaries) and extreme environmental conditions (e.g. prolonged exposure to unusually high temperature) were excluded.
- sodium intake was assessed based on urinary sodium excretion calculated from single or multiple 24-h urine collection(s). Other types of sodium intake measurements were excluded.

As only two studies in children met the eligibility criteria, they were evaluated individually (see scientific opinion) so that all trials included in the meta-analyses were on adults (18+ yrs old).

A total of 32 RCTs, providing 35 comparisons, met the eligibility criteria (Appendix A). All arms (68) from the eligible RCTs comparisons were included (Appendix B); McGregor 1989 and Sacks 2001 provided two comparisons (three levels of sodium intakes), so 3 arms each were retained in the pool, while all 4 arms were included from Watt 1985 as the two specific populations were considered as independent.

There were seven parallel RCTs, including one cluster-randomised trial, and 25 were cross-over RCTs.

A total of 25 trials modified sodium intake by providing subject with NaCl or placebo tablets or controlled diet with various amounts of Na ('feeding trials'), while seven trials used sodium reduction counselling ('counselling trials').

The between-group differences in mean 24-hour sodium excretion ranged from 13.3 to 285 mmol/day, with a median mean value of 72 mmol/day.

The study size ranged from 11 to 1,159 participants and the duration of the intervention lasted from 4 weeks to 36 months. A total of 17 studies involved hypertensive individuals, eight studies involved normotensive individuals and seven studies involved mixed populations.

Complete evidence tables on the included RCTs are available as an Appendix to the scientific opinion (Appendix I – table I.1, Experimental studies).

## 7.2. Overall summary effects

**Study-level pooled estimates** - The random-effect meta-analysis of the 32 eligible RCTs showed overall significant effects of sodium reduction on differences in means of SBP ( $-3.9$  (95% CI:  $-5.1, -2.8$ ) mm Hg;  $I^2$  61.9%,  $p < 0.001$ ; Figure 1: ) and DBP ( $-2.0$  (95% CI:  $-2.8, -1.2$ ) mm Hg;  $I^2$  60.6%,  $p < 0.001$ ; Figure 2: ).

**Arm-level pooled estimates** - The pooled mean estimate across the 68 arms was 137.1 (95% CI: 134.2, 140.1; Figure 3: ) mm Hg for SBP and 84.0 (95% CI: 82.03, 85.9; Figure 4: ) mm Hg for DBP. Heterogeneity was higher than in the study-level instances with an  $I^2$  of 99% ( $p < 0.001$ ) for both SBP and DBP.

**Figure 1:** Forest plot of the effect of salt reduction on SBP difference in means (study level). Individual study effect estimates are sorted by mean 24-hour urinary Na excretion change between groups.

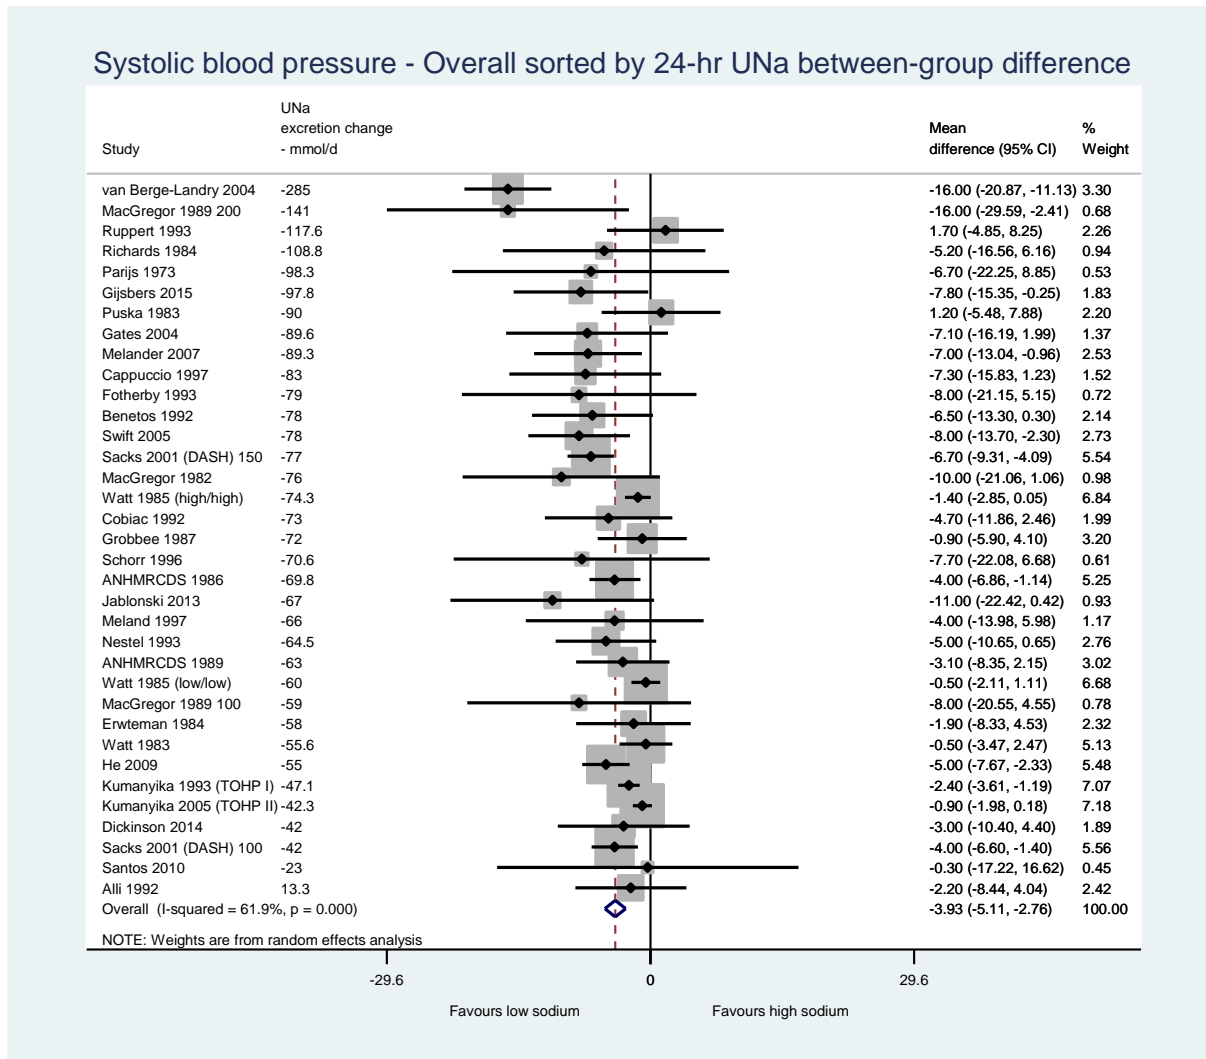

**Figure 2:** Forest plot of the effect of salt reduction on DBP difference in means (study level). Individual study effect estimates are sorted by mean 24-hour urinary Na excretion change between groups.

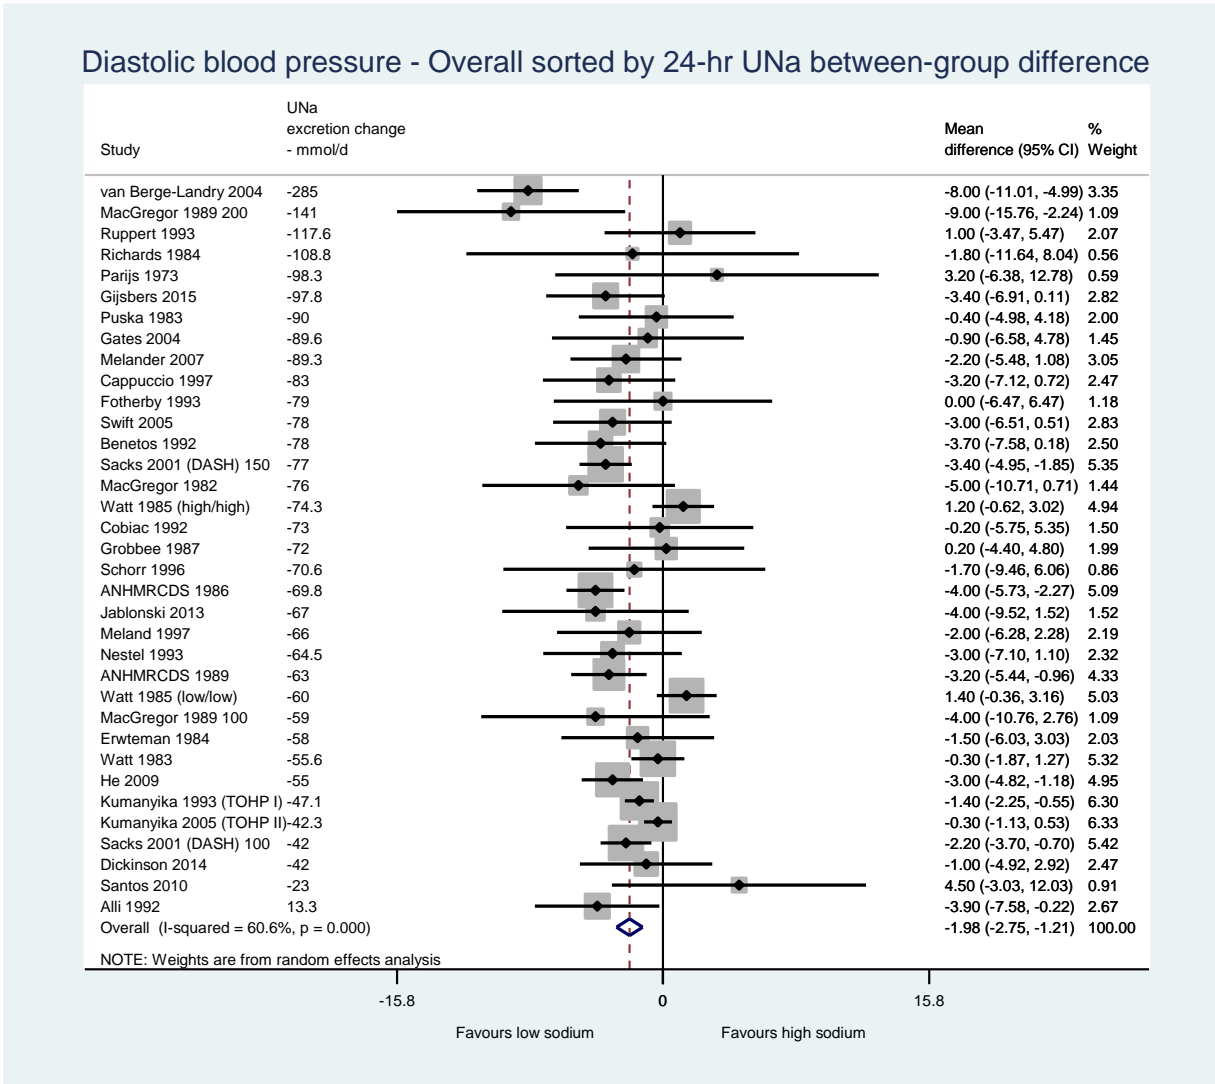

**Figure 3:** Mean SBP absolute values by trials arms, sorted by mean urinary Na excretion at end of trial. The pooled estimate is reported together with its 95% confidence and prediction intervals.

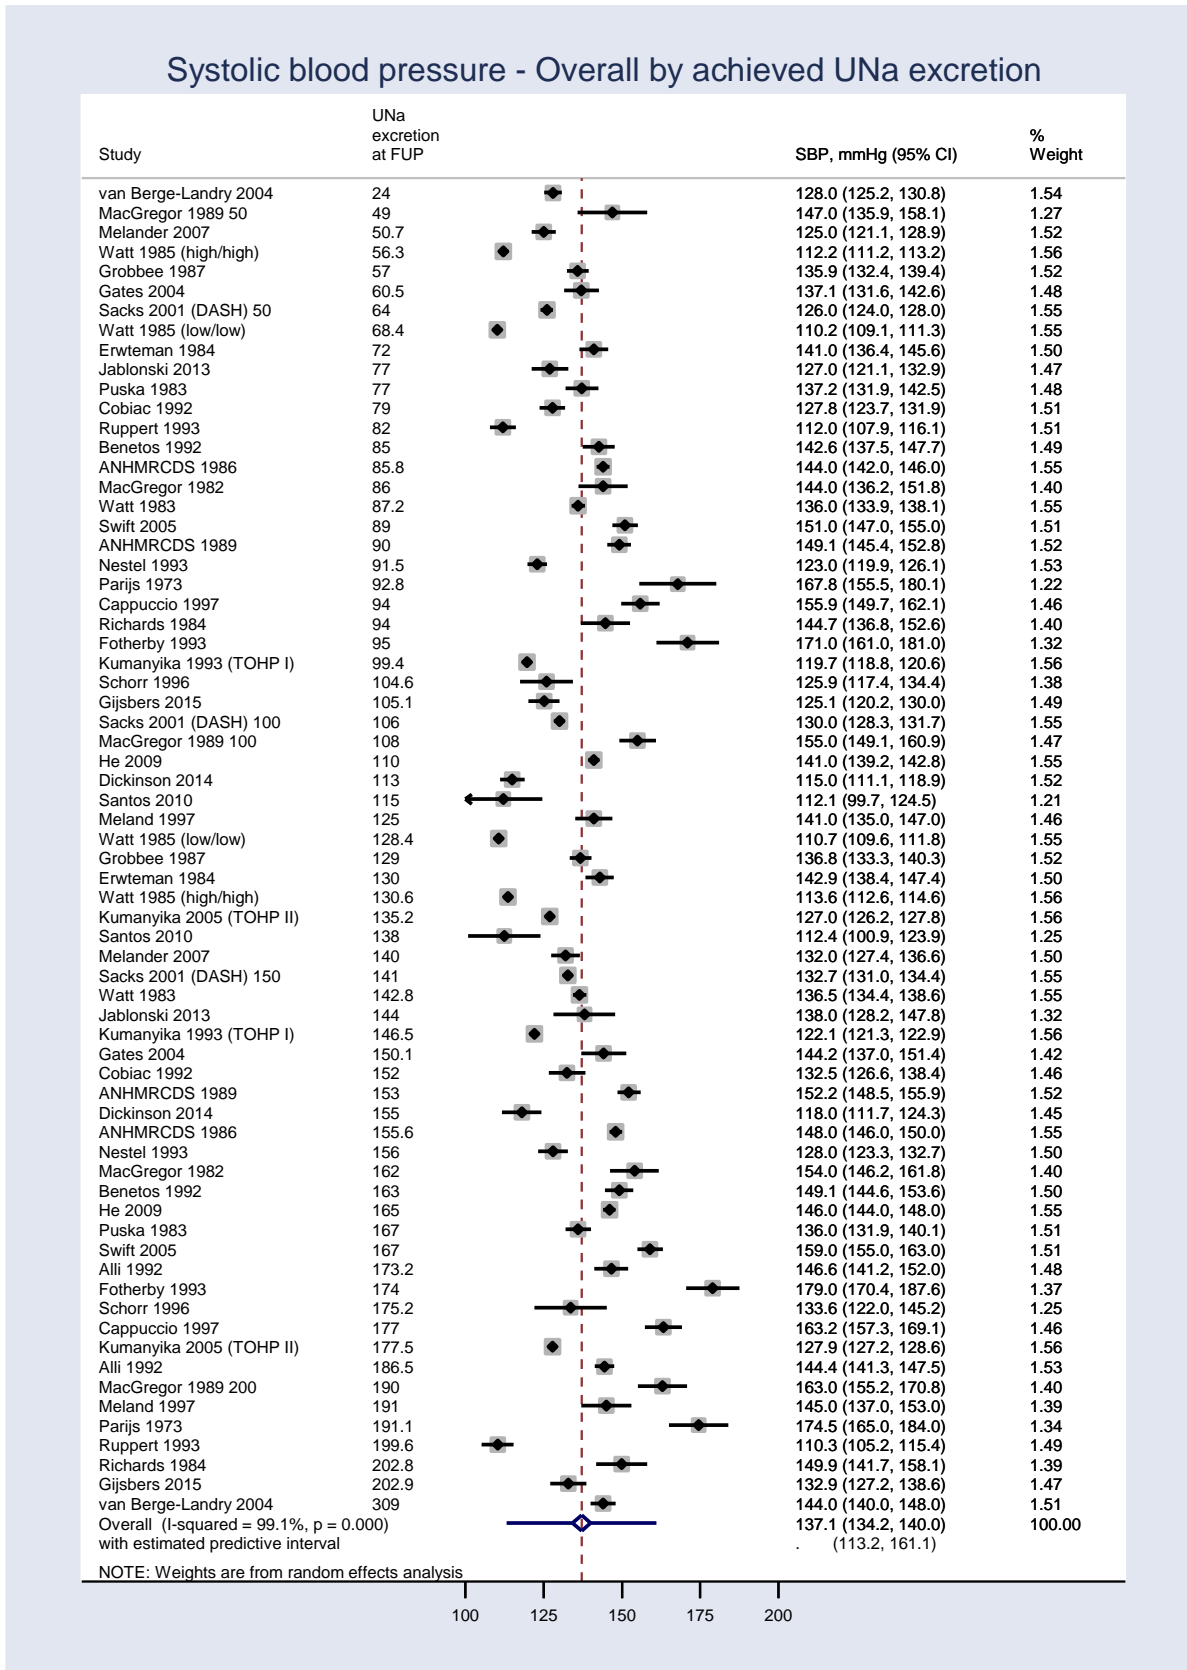

**Figure 4:** Mean DBP absolute values by trials arms, sorted by mean urinary Na excretion at end of trial. The pooled estimate is reported together with its 95% confidence and prediction intervals.

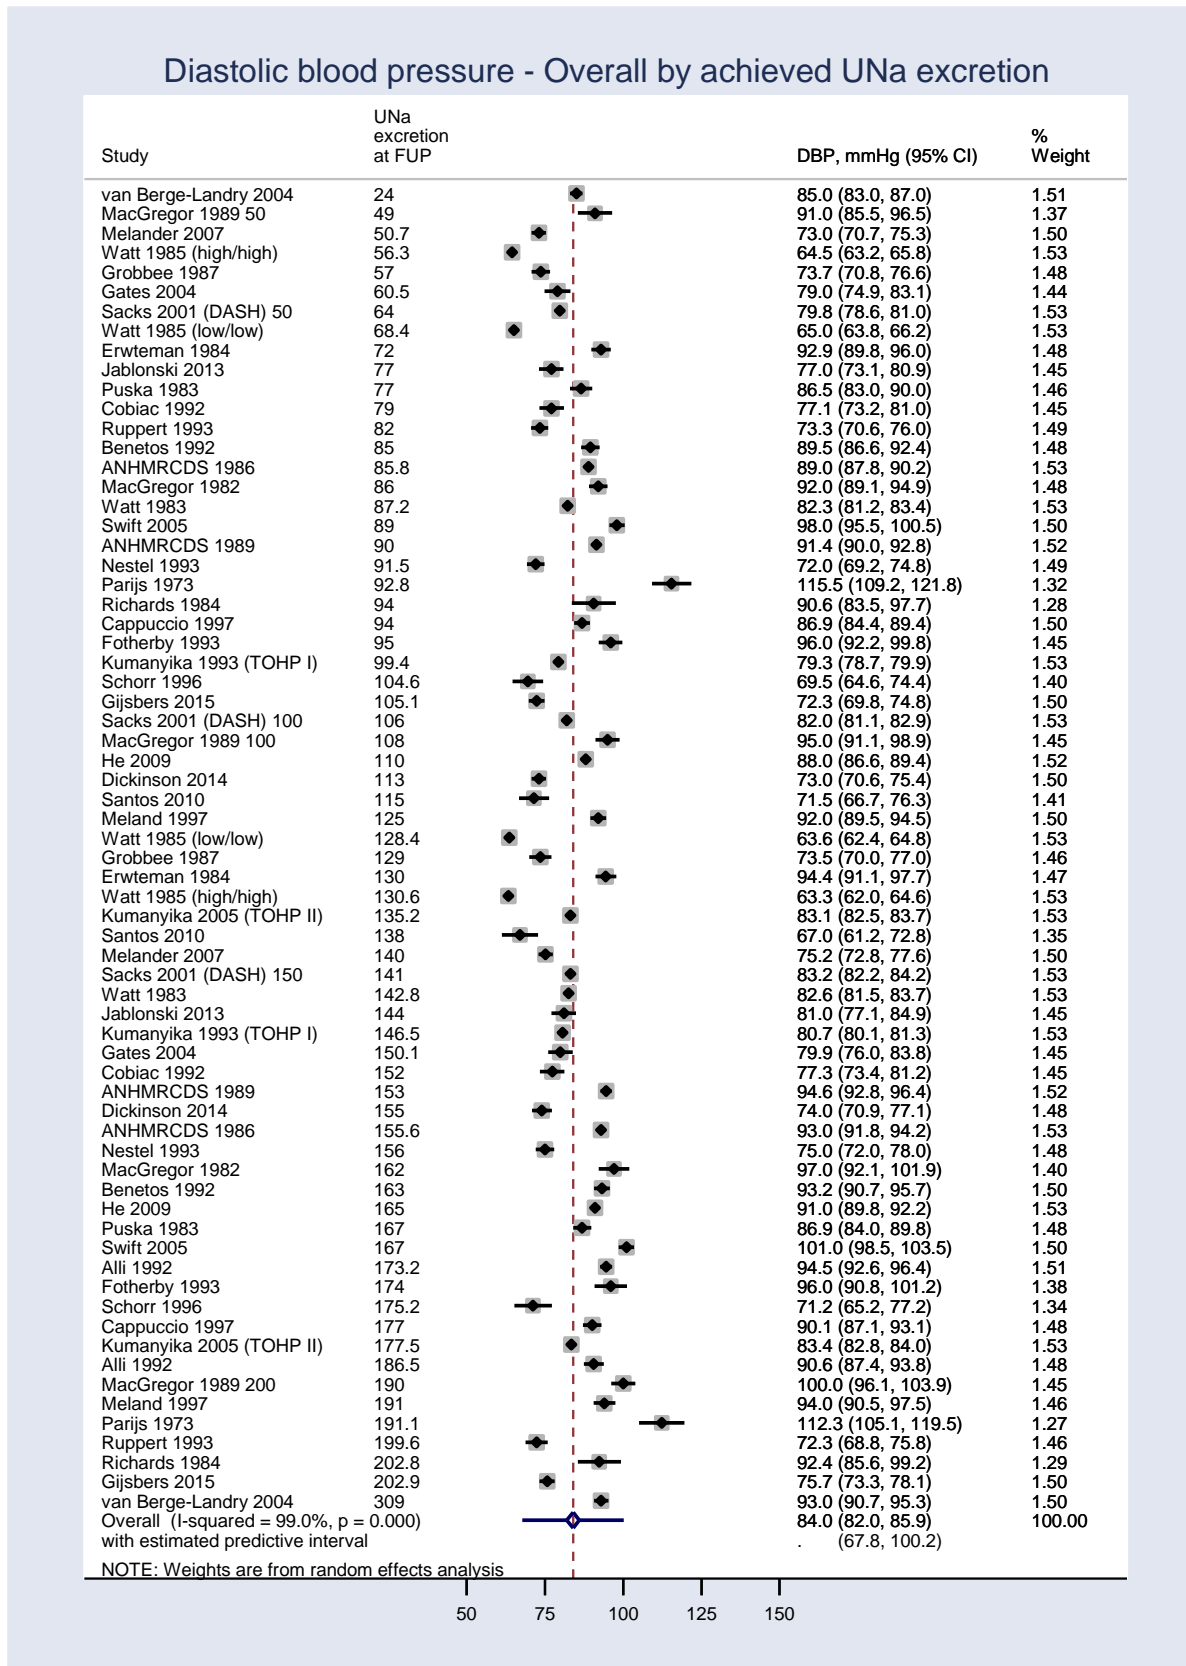

### 7.3. Subgroup analyses, investigation of heterogeneity between studies and arms

Several factors potentially influencing the dose-response relationships were identified *a priori* both from the literature and by the Panel.

Subgroup analyses (and corresponding modelling in meta-regressions) were performed to characterise methodological sources of heterogeneity and to evaluate the influence of potential effect modifiers as contextual sources of heterogeneity.

Methodological sources of heterogeneity included:

- Study design: Parallel, Cross-over, Cluster-randomised
- Specific trial design: No run-in, Run-in high sodium diet, Run-in low sodium diet, Run-in normal diet
- Trial duration: 1 month, 2-3 months,  $\geq 1$  year (based on duration distribution)
- Type of intervention: Feeding, Counselling
- Subject position while measuring BP: Supine, Sitting, Not reported
- Number of 24-h urinary collections: Single 24-h, Multiple 24-h, Not reported
- Risk of bias tier: Tier 1, Tier 2
- Risk of bias, specific domain: Definitely low risk of bias, Probably low risk of bias, High or NR (insufficient information) risk of bias
- Publication year: Before 1995, After 1995 (median year)
- Funding source: Public, Profit, Non-profit, Mixed, Not reported

Contextual sources of heterogeneity included:

- Age: < 50 yrs, old,  $\geq 50$  yrs old;
- Sex: > 55% men, 45–55% both genders, > 55% women;
- Blood pressure status: Hypertensive, Mixed, Normotensive
- BMI: < 25, 25–29,  $\geq 30$ , NR (not reported)
- Ethnicity: Caucasian, African (including AA – African American), Mixed, NR (not reported)
- Potassium intake at baseline:  $\leq 60$  mmol/day, 61-70 mmol/day, 71-80 mmol/day, >80 mmol/day, Not reported
- SBP at baseline: <140 mm Hg,  $\geq 140$  mm Hg, Not reported
- DBP at baseline: <90 mm Hg,  $\geq 90$  mm Hg, Not reported
- Urinary sodium excretion at baseline: <100 mmol/day, 100-149 mmol/day,  $\geq 150$  mmol/day, Not reported

“At baseline” is to be understood as “after run-in” where applicable.

Specific categorisations for urinary sodium excretion at end of trial (main moderator of interest in the dose-response modelling) were used in the study-level subgroup analyses:

- Urinary sodium excretion difference across arms: as categorical in study- and arm-level meta-analyses:  $\leq 50$  mmol, 51–75 mmol, 76–100 mmol, > 100 mmol
- Urinary sodium excretion achieved in low sodium arms:  $\leq 1.7$  g/day, >1.7 &  $\leq 2$  g/day, >2 &  $\leq 2.3$  g/day, >2.3 g/day
- Urinary sodium excretion achieved in high sodium arms:  $\leq 3$  g/day, >3 &  $\leq 3.6$  g/day, >3.6 &  $\leq 4.4$  g/day, >4.4 g/day

All subgroup results, both at study level (forest plots - Appendix H) and at arm level (forest plots - Appendix I) were interpreted only qualitatively and summary estimates compared by visual inspection; summaries of the meta-analyses results at study level are reported in Appendix D, Table 3: (SBP) and Table 4: (DBP).

A larger effect was found in hypertensive than normotensive individuals, for both SBP (hypertensive: –5.6 (95% CI: –8.1, –3.1) mm Hg vs. normotensive: –2.0 (95% CI: –3.3, –0.7) mm Hg) and DBP (hypertensive: –2.9 (95% CI: –4.2, –1.6) mm Hg vs. normotensive: –0.9 (95% CI: –1.6, –0.2) mm Hg).

The effect of sodium reduction was higher among subjects aged 50 years or more (SBP  $-6.1$  (95% CI:  $-8.2, -4.1$ ) mm Hg; DBP  $-2.9$  (95% CI:  $-4.0, -1.9$ ) mm Hg) than among subjects younger than 50 years (SBP  $-2.2$  (95% CI:  $-3.3, -1.1$ ) mm Hg; DBP  $-1.0$  (95% CI:  $-2.0, -0.0$ )).

With respect to sex, a higher effect was found in studies which consisted mostly of men (i.e.  $> 55\%$  of total sample) than in studies which consisted mostly of women. The exploration of the potential moderating effects of ethnicity, BMI, or potassium intake was limited by the large number of studies for which information on these factors was lacking.

Larger effects were found in cross-over compared to parallel trials and when measuring BP in supine position (SBP  $-5.6$  (95% CI:  $-7.5, -3.6$ ) mm Hg; DBP  $-2.7$  (95% CI:  $-3.8, -1.5$ ) mm Hg) compared to sitting position (SBP  $-2.5$  (95% CI:  $-3.6, -1.5$ ) mm Hg; DBP  $-1.4$  (95% CI:  $-2.3, -0.5$ ) mm Hg).

After exclusion of the van Berge-Landry study as an outlier, the effect of sodium reduction on SBP was  $-1.8$  (95% CI:  $-2.9, -0.8$ ) in 'counselling' trials and  $-4.0$  (95% CI:  $-5.3, -2.7$ ) in 'feeding' trials. The respective values for DBP were  $-1.7$  (95% CI:  $-2.6, -0.9$ ) and  $-1.8$  (95% CI:  $-3.2, -0.5$ ). The effect of sodium reduction was smaller in trials of longer duration ( $\geq 1$  year) compared to trials of shorter duration (4 weeks).

Three population subgroup meta-analyses were planned: adults vs. children; females vs. males; normotensive vs. hypertensive); results from individual studies on specific sub-populations were not used in separated subgroup meta-analyses as the number of estimates per sub-population was limited. Subgroup analyses by sex and BP status were carried out by classifying the trials according to the proportion of sub-populations and related eligibility criteria.

Subgroup analyses were repeated at the arm level (Appendix I); the same *a priori* categorisations of relevant potential modifiers were applied to identify candidate moderators to be included in the multivariable models.

## 8. Dose-response models

As the number of intake categories was not sufficient to estimate study-specific trends (i.e. less than 3), a one-stage (or 'pool-first') approach was taken, where study-specific data are combined first and then one summary dose-response model is fitted. In fact, most RCTs had just a "low" sodium intake group and a "high" sodium intake group.

Mixed-effects meta-regression models were fitted to account for the multilevel structure in the data, with arms nested within studies; two random effects (intercepts) on arm and study were specified and fixed effects were included from the list of potential moderators tested in univariate meta-regressions.

Mixed-effects models incorporated the extra variability (between-studies) in the same way as in a random-effects meta-analysis, with larger studies having more influence on the relationship than smaller studies (weighted by the precision of their respective response estimate). The approach allowed for the residual heterogeneity among dose-response estimates that could not be otherwise explained by the explanatory variables identified and tested.

### 8.1. Trials arms included in the dose-response models

A total of 60 points (arms as unit of analysis) from 28 RCTs were included in the final dose-response models.

Two RCTs were excluded from the meta-analysis pool because of missing information on age, after contacting the authors to possibly retrieve it (Puska et al. 1983, Richards et al. 1984). One (Alli et al. 1992) was excluded after thorough consideration of some inconsistencies in the design and results of the study. Van Berge-Landry was retained only for sensitivity analysis, given that it was the only study with UNa values in the control and intervention arms well beyond the range covered by all other trials (achieved mean urinary excretion: 309 and 24 mmol/day respectively). Two arms were included from all trials except for McGregor et. al 1989 (3), Sacks et. al 2001 (3) and Watt et. al 1985 (4).

In total 14 arms were from parallel RCTs, 46 were from cross-over RCTs and none from cluster-randomised trials. Relevant arm-level summary data are reported in Appendix B, while all study-level characteristics that apply also to arms are reported in Appendix A.



## 8.2. Models specification

Multilevel mixed-effects generalised linear models were fitted to the two(three)-level hierarchical data, with two observed levels, studies and arms, and a first level – subjects - that contains aggregated data (therefore, three implicit levels). Standard deviations were constrained to be equal to their estimated values at arm level. The mean-variance adaptive Gauss-Hermite quadrature was applied to estimate the integral required to calculate the log likelihood.

The independent variable was centered at 49 mmol/day (minimum mean UNa observed in the data set); by doing so the 0 point for UNa excretion was shifted to 49 mmol/day, as 0 is out of the range of plausible UNa values. Accordingly, the slope (regression coefficient) between UNa and mean BP did not change while the interpretation of the intercept (i.e. the mean of the response when all predictors are equal to their reference) was mean BP at 49 mmol/day (instead of mean BP at 0 mmol/day).

Mean urinary sodium excretion was modelled with restricted cubic splines to ensure more flexibility, as no assumptions on the dose-response curve shape are required; also, non-linear non-monotonic functional relationships (e.g. J-shaped curves) can be accommodated using only two parameters.

Different functional forms were explored for the shape of the dose-response relationship; non-linearities were tested by fitting both restricted cubic splines (three knots at 105, 128 and 145 mmol/day – Harrell's recommended percentiles) and linear splines (knot at 130 mmol/day). When only one random effect was specified in the models (trial arms), a steeper increase was detected at around 130 mmol/day; however, both splines were no longer statistically significant ( $p = 0.4464$  and  $p = 0.78$ , respectively) once both random effects (arms and studies) were specified in the models.

Incorporation of the variability around the study intercept into the models helped overcome the 'artefact' deriving from the constraint between the control and intervention groups belonging to the same study; the distribution of low sodium arms was to some extent determined by both the distribution of the paired high sodium arms (representing « habitual » Na intake groups) and the magnitude of the between groups difference in UNa (Appendix E, Figure 8).

For each mixed-effects meta-regression model the statistics  $\tau^2$ , *residual*  $I^2$  and adjusted  $R^2$  were calculated.

The change in  $\tau^2$  after inclusion of each covariate gives the amount of heterogeneity explained by the fitted model, and this value over the  $\tau^2$  from the null model gives the proportion of between-study variance explained (a type of adjusted  $R^2$ ).  $\tau^2$  decreased from 275 to 33 (SBP) and from 129 to 19 (DBP) in the final models, with included factors explaining up to 88% (85% for DBP) of heterogeneity (Appendix E, Table 5).

The *residual*  $I^2$  statistics gives a measure of the percentage of the residual variation (the one not explained by the covariates) that is attributable to between-study heterogeneity. Residual  $I^2$  also decreased after inclusion of the final set of covariates yet remaining very high (90%) (Appendix E, Table 5).

In addition to the evaluation of the relative reduction of  $\tau^2$  and of the joint testing (using the F distribution) of covariates as introduced in the model, a backward elimination process was used to check the set of explanatory variables identified by manual fitting in the final model as significant predictors of mean SBP and DBP.

## 8.3. Model diagnostics

Outliers and influential studies were detected and tests for normality and homoscedasticity carried out to check for model assumptions (e.g. normality of the random effects).

The normal probability plot of the standardised predicted random effects did not show substantial departure from normality; no outliers were identified by evaluation of standardised residual values, as none was smaller than -1 or larger than +1 (Appendix E, Figure 7: ) as estimated from the final models.

## 8.4. Dose-response moderators

A selection of priority study-level characteristics tested in independent subgroup analyses at arm level were incorporated in the meta-regression models one at a time and in the final multivariable models as follows:

- Urinary sodium excretion at end of trial: as continuous (mean values in mmol/day) – main predictor of interest
- Age: as continuous (mean age in completed years) and as categorical (<50 yrs old, ≥50 yrs old; < 40 yrs old, 40-49 yrs old, 50-59 yrs old, ≥ 60 yrs old)
- Sex: > 55% men, 45–55% both genders, > 55% women; > 50% men, > 50% women;
- BMI: < 25, 25–29, ≥ 30, NR (not reported)
- Ethnicity: Caucasian, African (including AA – African American), Mixed, NR (not reported)
- Blood pressure status: Hypertensive, Mixed, Normotensive; Hypertensive, Normotensive
- Potassium intake at baseline: as continuous (mmol/day) and as categorical (≤60 mmol/day, 61-70 mmol/day, 71-80 mmol/day, >80 mmol/day, Not reported)
- SBP at baseline: as continuous (mean values in mm Hg), as categorical: <140 mm Hg, ≥140 mm Hg, Not reported
- DBP at baseline: as continuous (mean values in mm Hg), as categorical: <90 mm Hg, ≥90 mm Hg, Not reported
- Urinary sodium excretion at baseline: as continuous (mmol/day) and as categorical (<100 mmol/day, 100-149 mmol/day, ≥150 mmol/day, Not reported)
- Study design: Parallel, Cross-over, Cluster-randomised
- Specific trial design: No run-in, Run-in high sodium diet, Run-in low sodium diet, Run-in normal diet; No run-in, Run-in normal diet, Run-in low sodium diet (high sodium lumped with normal diet)
- Trial duration: as continuous (in weeks) and as categorical (1 month, 2-3 months, ≥ 1 year),
- Type of intervention: Feeding, Counselling
- Subject's position while measuring BP: Supine, Sitting
- Number of 24-h urinary collections: Single 24h, Multiple 24h, Not reported
- Risk of bias tier: Tier 1, Tier 2
- Risk of bias, specific domain 'Outcome': Definitely low risk of bias, Probably low risk of bias, High or NR (insufficient information) risk of bias

"At baseline" is to be understood as "after run-in" where applicable.

## 8.5. Dose-response models results

The final set of covariates included in both SBP and DBP models was: mean age at baseline (<40 yrs old (ref.), 40-49, 50-59, ≥60 yrs old); blood pressure status at baseline (normotensive (ref.) hypertensive); mean urinary sodium excretion at baseline (<100 mmol/day (ref.), 100-149, ≥150 mmol/day); blood pressure measurement method (supine (ref.), sitting); and specific trial design (no run-in (ref.), run-in normal diet, run-in low sodium diet) Table 1: and Table 2: ).

For each 100 mmol/day increase in mean urinary sodium excretion, holding all other covariates constant, mean systolic blood pressure increased linearly by 5.3 mm Hg (95%CI: 3.6-6.9 mm Hg) and mean diastolic blood pressure increased linearly by 2.6 mm Hg (95%CI: 1.6-3.7 mm Hg). Similar effects were estimated in crude models (with no other moderators than sodium excretion).

Mean sodium excretion explained only 4% of the heterogeneity across trials arms in the SBP model and 3% in the DBP model (3% and 2% respectively when study was introduced as a random intercept). However, in both models the set of moderators explained more than 85% of the between-study heterogeneity.

In stratified analyses a larger association was found in hypertensive than normotensive individuals, for both SBP (hypertensive: 6.4 (95% CI: 4.3, 8.6) mm Hg vs normotensive: 4.4 (95% CI: 2.1, 6.6) mm Hg) and DBP (hypertensive: 3.7 (95% CI: 2.5, 5.0) mm Hg vs normotensive: 1.7 (95% CI: 0.1, 3.3) mm Hg). The effect of sodium was higher among subjects aged 50 years or more (SBP 7.1 (95% CI:

5.0, 9.2) mm Hg; DBP 3.8 (95% CI: 2.6, 5.0) mm Hg) than among subjects younger than 50 years (SBP 3.5 (95% CI: 1.5, 7.4) mm Hg; DBP 1.2 (95% CI: -0.4, 2.9).

Potential moderating effects of K, BMI, and ethnicity could not be explored due to lack of information; sex showed some variability across subgroups in meta-analyses on trials, but the effect was not replicated in models on arms (proportion of males:  $\leq 50\%$ ,  $> 50\%$ ) as it did not explain the between-study heterogeneity, neither in the univariate analyses nor in the multivariable models.

Mean baseline blood pressure was the factor explaining the highest proportion of between-study variability (86% and 80% in univariate meta-regression models for SBP and DBP respectively).

It is expected that baseline values can serve as a surrogate for many influencing factors, potentially including some of those that could not be measured in the analysed trials (or for which there was incomplete information) (Section 1.4). Given the presence of missing data (17%) and the limited informativeness of models with baseline SBP and baseline DBP as major predictors, the final adjusted models did not include them among the moderators.

A linear dose-response relationship was estimated between mean sodium urinary excretion and mean SBP and DBP at arm level (Figure 5: and Figure 6: ) in the range of mean UNa between 49 and 209 mmol/day. A sensitivity analysis carried out to assess the impact of the inclusion of van Berge-Landry arms showed practically no change in the regression coefficient for sodium (SBP 5.4 (95% CI: 4.1, 6.7) mm Hg; DBP 2.7 (95% CI: 1.9, 3.5) mm Hg) in fully adjusted models (Appendix F, Figure 10: ; figure on DBP not shown).

**Table 1:** Multivariable mixed-effects meta-regression model on **systolic blood pressure**, only fixed effects reported. Centered at 49 mmol/d sodium excretion (minimum mean UNa observed in the data set); total heterogeneity (random effect on trial) estimated from null model = 275.2 (95% CI: 161.4 - 468.9), residual heterogeneity from full model = 33.4 (95% CI: 13.3 to 53.5).

| Covariate                                           | $\beta$<br>coefficient | Std.<br>Error | P> z             | 95% Confidence<br>Interval |
|-----------------------------------------------------|------------------------|---------------|------------------|----------------------------|
| <b>Mean UNa excretion –<br/>100 mmol/d per unit</b> | <b>5.3</b>             | <b>0.8</b>    | <b>&lt;0.001</b> | <b>(3.6 to 6.9)</b>        |
| <b>Age at baseline</b>                              |                        |               |                  |                            |
| :Age < 40 yrs old*                                  | 0                      |               |                  |                            |
| Age 40-49 yrs old                                   | 18.2                   | 4.4           | <0.001           | (9.6 to 26.9)              |
| Age 50-59 yrs old                                   | 11.6                   | 4.7           | 0.013            | (2.4 to 20.7)              |
| Age >= 60 yrs old                                   | 12.4                   | 4.2           | 0.003            | (4.3 to 20.6)              |
| <b>Blood pressure status</b>                        |                        |               |                  |                            |
| i Normotensive*                                     | 0                      |               |                  |                            |
| c Hypertensive                                      | 11.4                   | 4.5           | 0.011            | (2.6 to 20.1)              |
| <b>UNa excretion at baseline</b>                    |                        |               |                  |                            |
| e <100 mmol/d*                                      | 0                      |               |                  |                            |
| s 100-149 mmol/d                                    | 25.2                   | 6.3           | <0.001           | (12.7 to 37.6)             |
| >=150 mmol/d                                        | 18.7                   | 6.4           | 0.004            | (6.0 to 31.3)              |
| t Not reported                                      | 13.4                   | 5.3           | 0.012            | (3.0 to 23.8)              |
| <b>BP measurement method</b>                        |                        |               |                  |                            |
| Point office, supine*                               | 0                      |               |                  |                            |
| Point office, sitting                               | -13.2                  | 3.2           | <0.001           | (-19.6 to -6.9)            |
| <b>Specific trial design</b>                        |                        |               |                  |                            |
| r No Run-in*                                        |                        | 0             |                  |                            |
| e Run-in, Normal Diet                               | 11.9                   | 3.4           | <0.001           | (5.3 to 18.5)              |
| f Run-in, Low Na Diet                               | 19.7                   | 5.1           | <0.001           | (9.7 to 29.8)              |
| <b>Constant</b>                                     | 95.5                   | 6.8           | <0.001           | (82.2 to 108.8)            |

\* reference category

**Table 2:** Multivariable mixed-effects meta-regression model on **diastolic blood pressure**, only fixed effects reported. Centred at 49 mmol/d sodium excretion (minimum mean UNa observed in the data set); total heterogeneity (random effect on trial) estimated from null model = 129.1 (95% CI: 76.1 - 218.8), residual heterogeneity from full model = 18.8 (95% CI: 8.1 to 29.4).

| Covariate                                           | $\beta$<br>coefficient | Std.<br>Error | P> z             | 95% Confidence<br>Interval |
|-----------------------------------------------------|------------------------|---------------|------------------|----------------------------|
| <b>Mean UNa excretion –<br/>100 mmol/d per unit</b> | <b>2.6</b>             | <b>0.5</b>    | <b>&lt;0.001</b> | <b>(1.6 to 3.7)</b>        |
| <b>Age at baseline</b>                              |                        |               |                  |                            |
| Age < 40 yrs old*                                   | 0                      |               |                  |                            |
| Age 40-49 yrs old                                   | 18.2                   | 3.2           | <0.001           | (11.9 to 24.6)             |
| Age 50-59 yrs old                                   | 11.8                   | 3.5           | 0.001            | (5.1 to 18.6)              |
| Age $\geq$ 60 yrs old                               | 7.8                    | 3.1           | 0.011            | (1.8 to 13.8)              |
| <b>Blood pressure status</b>                        |                        |               |                  |                            |
| Normotensive*                                       | 0                      |               |                  |                            |
| Hypertensive                                        | 8.7                    | 3.3           | 0.008            | (2.3 to 15.1)              |
| <b>UNa excretion at baseline</b>                    |                        |               |                  |                            |
| <100 mmol/d*                                        | 0                      |               |                  |                            |
| 100-149 mmol/d                                      | 10.4                   | 4.5           | 0.022            | (1.5 to 19.3)              |
| $\geq$ 150 mmol/d                                   | 10.2                   | 4.7           | 0.028            | (1.1 to 19.4)              |
| Not reported                                        | 10.4                   | 3.8           | 0.007            | (2.9 to 17.9)              |
| <b>BP measurement method</b>                        |                        |               |                  |                            |
| Point office, supine*                               | 0                      |               |                  |                            |
| Point office, sitting                               | -6.6                   | 2.4           | 0.005            | (-11.3 to -2.0)            |
| <b>Specific trial design</b>                        |                        |               |                  |                            |
| No Run-in*                                          |                        | 0             |                  |                            |
| Run-in, Normal Diet                                 | 7.9                    | 2.5           | 0.002            | (3.0 to 12.7)              |
| Run-in, Low Na Diet                                 | 7.7                    | 3.7           | 0.037            | (0.5 to 15.0)              |
| <b>Constant</b>                                     | 55.4                   | 4.8           | <0.001           | (45.9 to 64.8)             |

\* reference category

**Figure 5:** Linear dose-response relationship between mean urinary sodium excretion and **mean systolic blood pressure** from meta-regression modelling of trials arms (crude model). Circles represents mean SBP by arm and their size is proportional to weights from the mixed-effects model. The slope from the full model with moderators did not differ substantially (UNa unadjusted coefficient: 5.2 mm Hg per 100 mmol/day, 95% CI: 3.6-6.9).

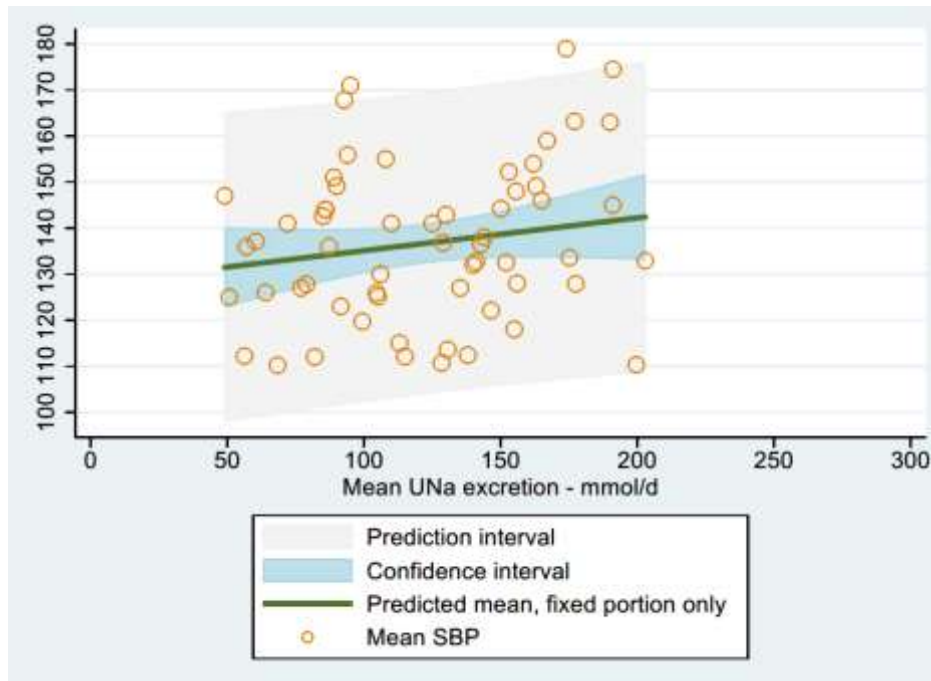

**Figure 6:** Linear dose-response relationship between mean urinary sodium excretion and **mean diastolic blood pressure** from meta-regression modelling of trials arms (crude model). Circles represents mean DBP by arm and their size is proportional to weights from the mixed-effects model. The slope from the full model with moderators did not differ substantially (UNa unadjusted coefficient: 2.6 mm Hg per 100 mmol/day, 95% CI: 1.6-3.7).

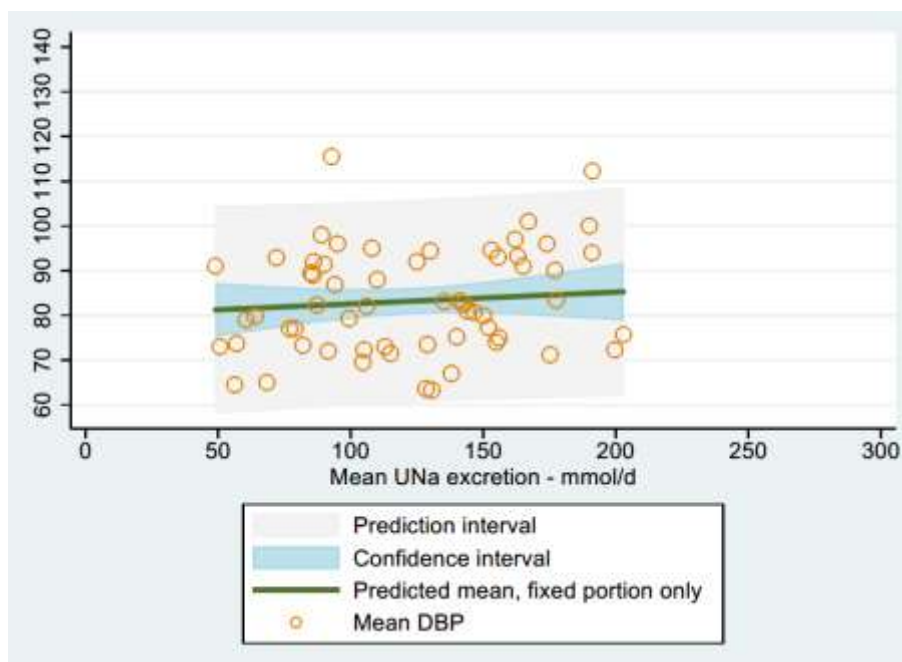

## 9. Addressing risk of bias in the analysis

The outcome of the risk of bias assessment (individual dimensions and overall assessment) was used to evaluate whether heterogeneity of results could be attributed to differences in internal validity across individual studies, both in the meta-analyses and in meta-regression models (Appendix C). The following approaches were applied:

- A study-level subgroup analysis based on the overall RoB rating as expressed by different tiers of reliability (tier 1 and 2) was carried out and stratified pooled estimates showed a larger effect in tier 2 trials (Appendix D, Table 3: and Table 4: , Appendix H). Tier of risk of bias was not part of the final set of covariates as its adjusted  $R^2$  was negligible.
- Individual RoB dimensions were evaluated in univariate and multivariable analyses. 'Outcome assessment' was found to play a role in further explaining heterogeneity (Appendix H) while all other dimensions (randomization appropriate, allocation concealment, etc.) did not have a statistically significant impact on the estimates (data not shown). However, outcome assessment was not included in the final models as the stratum showing larger estimates was based on a very few studies, including van Berge-Landry 2004.

## 10. Sensitivity Analyses

Sensitivity analyses were carried out to evaluate whether the findings were robust to the assumptions made in the systematic review protocols and the analyses.

There were a number of assumptions/decisions/issues provisionally identified that could potentially be tested in sensitivity analyses by comparing the results obtained with alternative input parameters to those from the default model or by restricting to specific sub-sets; none of them raised serious concerns about the robustness of the overall analysis.

The following analyses were considered, and results are reported under section 7.3 and 8.5:

- sitting vs supine measurements;
- use of the average 24-hour urinary sodium collections as opposed to single 24-hour collection;
- van Berge-Landry exclusion with respect to type of intervention in subgroup analyses for SBP and DBP (Appendix F, Figure 9);
- van Berge-Landry inclusion in dose-response models, given its specific UNa values range not covered by all other trials (Appendix F, Figure 10)

Point BP and 24-h BP represent two different biological variables which could be differentially affected by sodium intake. Accordingly, all available measures (point office/home BP, 24-h BP) were extracted from each study but were not evaluated in subgroup analyses due to lack of time.

## 11. Publication bias

Several systematic reviews of empirical studies have found that studies with statistically significant ( $P < 0.05$ ) or positive results are more likely to be published than those with non-significant or negative results and tend to be published earlier.

Publication bias was assessed by visual inspection of the funnel plot (Sterne et al. 2001) and by performing the Egger's test for funnel plot asymmetry (Egger et al. 1997; Sterne et al., 2005) on mean differences in SBP from the 32 RCTs included in the meta-analyses. Contours of statistical significance were superimposed on the funnel plot to help evaluate potential small-study effects (Appendix G, Figure 11).

Egger's test performed a linear regression of the mean difference estimates on their standard errors, weighted by  $1 / (\text{variance of the summary estimate})$  (Appendix G, Figure 12); the test was statistically significant ( $p = 0.001$ ).

Funnel plots investigate the association between study size and effect size; there was a clear indication of funnel plot asymmetry, as trials were missing in the right-hand side of the funnel. Since studies

spread across all areas of significance publication bias was not considered a plausible explanation for the plot asymmetry (Sterne 2011).

## 12. Analysis uncertainties

Sources of uncertainty specific to the statistical analysis and their potential impact on the final estimates, where possible, were identified and described. Results from the sensitivity analyses further contributed to the interpretation of the dose-response results and together with additional considerations informed the overall assessment of the uncertainty in the body of evidence (see section 6 in the scientific opinion).

- The nature and structure of the dataset introduced specific challenges to model interpretation; there was a strong 'methodological' component (covariates that were linked to the experimental setting) included in the models in order to reach a good fitting and that explained a large part of the heterogeneity between studies (random effects).
- Constants (intercepts) and predictions were difficult to reconcile with 'populations' values (and were substantially influenced by experimental factors).
- The use of data generated in controlled settings was expected to provide a better characterisation of the sodium-blood pressure relationship than using data from observational studies (due to potential confounding); however, the experimental setting was broken to conduct an « observational » type of analysis (with paired points).
- Due to missing information it was not possible to explore important moderators (e.g. BMI, ethnicity, potassium intake and energy intake).
- The model is conditional to the data set and population characteristics of included trials (e.g. relative proportion of trials in normotensives vs. hypertensives, age groups, sex); most studies were of short duration and cross-over by design.
- There was large heterogeneity around the dose-response ( $I^2 = 99%$ ); the mixed-effects meta-regression models with 2 random effects and 5 fixed effects explained 85%-88% of it, yet 15% remained unexplained.
- Previous analyses on sodium intake and blood pressure have encountered difficulties in taking into account the high inter-individual and intra-individual variability of their measurements. The confidence interval in meta-regression analyses provides only an estimate of the uncertainty about the fitted response line due to sampling; meta-regressions performed on individual participant data could be a better approach to address this limitation, not applicable in the case of the current analysis as no individual data were available.
- General considerations around meta-regression (Thompson 2002) also apply: the model is a representation of the relationship between mean Na and mean BP at 'group' level (aggregated data), it may be different when explored on individual data (aggregation bias); the relationship described is observational in nature, even when is classically modelled on trials effect measures (as opposed to arms absolute values); some factors could not be explored because were not sufficiently variable across studies (e.g. risk of bias from outcome assessment).



## References

- Borenstein M, Hedges LV, Higgins JP and Rothstein HR, 2010. A basic introduction to fixed-effect and random-effects models for meta-analysis. *Res Synth Methods*, 1, 97-111.
- DerSimonian R and Laird N, 1986. Meta-analysis in clinical trials. *Control Clin Trials*, 7, 177-188.
- Egger M, Smith GD, Schneider M, Minder C, 1997. Bias in meta-analysis detected by a simple, graphical test. *BMJ* 1997; 315: 629-634.
- Furukawa TA, Barbui C, Cipriani A, Brambilla P and Watanabe N, 2006. Imputing missing standard deviations in meta-analyses can provide accurate results. *J Clin Epidemiol*, 59, 7-10.
- Graudal NA, Hubeck-Graudal T, Jurgens G, 2017. Effects of low sodium diet versus high sodium diet on blood pressure, renin, aldosterone, catecholamines, cholesterol, and triglyceride. *Cochrane Database of Systematic Reviews* 2017, Issue 4. Art. No.: CD004022.
- Greenland S and Longnecker MP, 1992. Methods for trend estimation from summarized dose-response data, with applications to meta-analysis. *Am J Epidemiol*, 135, 1301-1309.
- Newberry SJ, Chung M, Anderson CAM, Chen C, Fu Z, Tang A, Zhao N, Booth M, Marks J, Hollands S, Motala A, Larkin JK, Shanman R, Hempel S. Sodium and Potassium Intake: Effects on Chronic Disease Outcomes and Risks. Comparative Effectiveness Review No. 206. (Prepared by the RAND Southern California Evidence-based Practice Center under Contract No. 290-2015-00010-I.) AHRQ Publication No. 18-EHC009-EF. Rockville, MD: Agency for Healthcare Research and Quality; June 2018. Posted final reports are located on the Effective Health Care Program search page.
- He FJ, Li J and Macgregor GA, 2013. Effect of longer-term modest salt reduction on blood pressure. *Cochrane Database Syst Rev*, 4, CD004937
- Higgins, J. P. T., and S. G. Thompson. 2001. Presenting random effects meta-analyses: Where we are going wrong? 9th International Cochrane Colloquium, Lyon, France.
- Higgins JPT, Thompson SG, 2002. Quantifying heterogeneity in a meta-analysis. *Statistics in Medicine* 2002; 21: 1539-1558.
- Higgins JP and Thompson SG, 2004. Controlling the risk of spurious findings from meta-regression. *Stat Med*, 23, 1663-1682.
- Higgins JPT, Green S (editors). *Cochrane Handbook for Systematic Reviews of Interventions* Version 5.1.0 [updated March 2011]. The Cochrane Collaboration, 2011. Available from [www.handbook.cochrane.org](http://www.handbook.cochrane.org).
- Orsini N, Li R, Wolk A, Khudyakov P and Spiegelman D, 2012. Meta-analysis for linear and nonlinear dose-response relations: examples, an evaluation of approximations, and software. *Am J Epidemiol*, 175, 66-73.
- Ross Harris & Mike Bradburn & Jon Deeks & Roger Harbord & Doug Altman & Thomas Sterne & Jonathan Sterne, 2006. "METAN: Stata module for fixed and random effects meta-analysis," Statistical Software Components S456798, Boston College Department of Economics, revised 23 Sep 2010.
- Skrondal, A., and S. Rabe-Hesketh. 2004. *Generalized Latent Variable Modeling: Multilevel, Longitudinal, and Structural Equation Models*. Boca Raton, FL: Chapman & Hall/CRC.
- StataCorp, 2013. *Stata Statistical Software: Release 13*. College Station, TX: StataCorp LP
- Sterne JA, Sutton AJ, Ioannidis JP, Terrin N, Jones DR, Lau J, Carpenter J, Rücker G, Harbord RM, Schmid CH, Tetzlaff J, Deeks JJ, Peters J, Macaskill P, Schwarzer G, Duval S, Altman DG, Moher D, Higgins JP, 2011. Recommendations for examining and interpreting funnel plot asymmetry in meta-analyses of randomised controlled trials. *BMJ*. 2011 Jul 22;343:d4002
- Thompson SG, Higgins JP, 2002. How should meta-regression analyses be undertaken and interpreted? *Stat Med*. 2002 Jun 15;21(11):1559-73.
- WHO (World Health Organization), 2012a. Effect of reduced sodium intake on blood pressure, renal functions, blood lipids and other potential adverse effects. p 150.

WHO (World Health Organization), 2012b. Effect of reduced sodium intake on cardiovascular disease, coronary heart disease and stroke. 77 pp.

## Appendices

### Appendix A - Trials main characteristics

Eligibility criteria, relevant contextual and methodological characteristics, and summary data of thirty-two trials (35 comparisons) included in study-level meta-analyses.

| Study                    | Country | N of subjects | Mean age     | Age - eligibility criteria | Women %  | BP status    | Ethnicity        |
|--------------------------|---------|---------------|--------------|----------------------------|----------|--------------|------------------|
|                          |         |               | <i>years</i> | <i>years</i>               | <i>%</i> |              |                  |
| Alli 1992                | IT      | 56            | 44.3         | 18+                        | 65       | Hypertensive | Not reported     |
| ANHMRCDS 1986            | AU      | 100           | 52.3         | 40-65                      | 14       | Mixed        | Not reported     |
| ANHMRCDS 1989            | AU      | 103           | 58           | 18+                        | 16       | Hypertensive | Not reported     |
| Benetos 1992             | FR      | 20            | 41.5         | 22-55                      | 55       | Hypertensive | Not reported     |
| Cappuccio 1997           | UK      | 47            | 66.8         | (60-78)                    | 49       | Mixed        | Mixed            |
| Cobiac 1992              | AU      | 54            | 67           | 60-80                      | 33       | Mixed        | Not reported     |
| Dickinson 2014           | AU      | 25            | 56.8         | 18+                        | 68       | Normotensive | Not reported     |
| Erwteman 1984            | NL      | 94            | 45           | 20-70                      | 38       | Hypertensive | Mixed            |
| Fotherby 1993            | UK      | 17            | 73           | (66-79)                    | 76       | Hypertensive | Caucasian        |
| Gates 2004               | US      | 12            | 63           | 50+                        | 50       | Hypertensive | Caucasian        |
| Gijsbers 2015            | NL      | 36            | 65.8         | 40-80                      | 33       | Mixed        | Caucasian        |
| Grobbee 1987             | NL      | 40            | 24           | (18-28)                    | 15       | Hypertensive | Not reported     |
| He 2009                  | UK      | 169           | 50           | 30-75                      | 33       | Hypertensive | Mixed            |
| Jablonski 2013           | US      | 11            | 60           | 50-79                      | 27       | Mixed        | Mixed            |
| Kumanyika 1993 (TOHP I)  | US      | 699           | 43.4         | 30-54                      | 28       | Normotensive | Mixed            |
| Kumanyika 2005 (TOHP II) | US      | 1029          | 44.2         | 30-54                      | 33       | Normotensive | Mixed            |
| MacGregor 1982           | UK      | 19            | 49           | (30-66)                    | 26       | Hypertensive | Mixed            |
| MacGregor 1989 100       | UK      | 20            | 57           | (42-72)                    | 45       | Hypertensive | Mixed            |
| MacGregor 1989 200       | UK      | 20            | 57           | (42-72)                    | 45       | Hypertensive | Mixed            |
| Meland 1997              | NO      | 16            | 50           | 20-69                      | 19       | Hypertensive | Not reported     |
| Melander 2007            | SE      | 39            | 53           | 18+                        | 49       | Normotensive | Not reported     |
| Nestel 1993              | AU      | 66            | 65.5         | 60-79                      | 50       | Normotensive | Not reported     |
| Parijs 1973              | BE      | 17            | 41.2         | 18+                        | 55       | Hypertensive | Not reported     |
| Puska 1983               | FI      | 72            | -            | 30-50                      | 50       | Mixed        | Not reported     |
| Richards 1984            | NZ      | 12            | -            | (19-52)                    | 33       | Hypertensive | Not reported     |
| Ruppert 1993             | DE      | 25            | 47           | (19-78)                    | 60       | Normotensive | Not reported     |
| Sacks 2001 (DASH) 100    | US      | 192           | 49           | 22+                        | 54       | Mixed        | Mixed            |
| Sacks 2001 (DASH) 150    | US      | 192           | 49           | 22+                        | 54       | Mixed        | Mixed            |
| Santos 2010              | PT      | 17            | 38.5         | (24-53)                    | 53       | Normotensive | Not reported     |
| Schorr 1996              | DE      | 16            | 64.1         | (60-72)                    | 56       | Normotensive | Not reported     |
| Swift 2005               | UK      | 40            | 50           | 18+                        | 57       | Hypertensive | African incl. AA |
| van Berge-Landry 2004    | US      | 48            | 51           | middle-aged adults         | 21       | Hypertensive | Mixed            |
| Watt 1983                | UK      | 18            | 52           | (31-64)                    | 67       | Hypertensive | Not reported     |
| Watt 1985 (high/high)    | UK      | 35            | 22.3         | young adults               | 63       | Mixed        | Not reported     |
| Watt 1985 (low/low)      | UK      | 31            | 22.7         | young adults               | 55       | Mixed        | Not reported     |

| Study                    | Study design       | Specific trial design | Trial duration | Intervention type | Number of urinary collections | BP measure position |
|--------------------------|--------------------|-----------------------|----------------|-------------------|-------------------------------|---------------------|
|                          |                    |                       | <i>weeks</i>   |                   |                               | <i>point office</i> |
| Alli 1992                | Cluster-randomized | Run-in - Normal diet  | 52             | Counselling       | Single 24h                    | Supine              |
| ANHMRCDS 1986            | Parallel           | Run-in - Normal diet  | 12             | Counselling       | Single 24h                    | Sitting             |
| ANHMRCDS 1989            | Parallel           | Run-in - Normal diet  | 8              | Feeding           | Single 24h                    | Sitting             |
| Benetos 1992             | Cross-over         | No run-in             | 4              | Feeding           | Single 24h                    | Supine              |
| Cappuccio 1997           | Cross-over         | Run-in - Low Na diet  | 4              | Feeding           | Multiple 24h                  | Supine              |
| Cobiac 1992              | Parallel           | Run-in - High Na diet | 4              | Feeding           | Single 24h                    | Sitting             |
| Dickinson 2014           | Cross-over         | No run-in             | 6              | Feeding           | Multiple 24h                  | Sitting             |
| Erwteman 1984            | Parallel           | No run-in             | 4              | Counselling       | Multiple 24h                  | Supine              |
| Fotherby 1993            | Cross-over         | Run-in - Low Na diet  | 5              | Feeding           | Multiple 24h                  | Supine              |
| Gates 2004               | Cross-over         | No run-in             | 4              | Feeding           | Single 24h                    | Supine              |
| Gijsbers 2015            | Cross-over         | Run-in - Low Na diet  | 6              | Feeding           | Single 24h                    | Supine              |
| Grobbee 1987             | Cross-over         | Run-in - Normal diet  | 6              | Feeding           | Multiple 24h                  | Supine              |
| He 2009                  | Cross-over         | Run-in - Low Na diet  | 6              | Feeding           | Multiple 24h                  | Sitting             |
| Jablonski 2013           | Cross-over         | No run-in             | 5              | Feeding           | Multiple 24h                  | Supine              |
| Kumanyika 1993 (TOHP I)  | Parallel           | No run-in             | 78             | Counselling       | Single 24h                    | Sitting             |
| Kumanyika 2005 (TOHP II) | Parallel           | No run-in             | 156            | Counselling       | Not reported                  | Sitting             |
| MacGregor 1982           | Cross-over         | Run-in - Low Na diet  | 4              | Feeding           | Multiple 24h                  | Supine              |
| MacGregor 1989 100       | Cross-over         | Run-in - Low Na diet  | 4              | Feeding           | Multiple 24h                  | Supine              |
| MacGregor 1989 200       | Cross-over         | Run-in - Low Na diet  | 4              | Feeding           | Multiple 24h                  | Supine              |
| Meland 1997              | Cross-over         | Run-in - Normal diet  | 8              | Feeding           | Single 24h                    | Sitting             |
| Melander 2007            | Cross-over         | No run-in             | 4              | Feeding           | Single 24h                    | Supine              |
| Nestel 1993              | Parallel           | Run-in - High Na diet | 4              | Feeding           | Single 24h                    | Sitting             |
| Parijs 1973              | Cross-over         | Run-in - Normal diet  | 4              | Feeding           | Single 24h                    | Supine              |
| Puska 1983               | Parallel           | No run-in             | 6              | Counselling       | Single 24h                    | Sitting             |
| Richards 1984            | Cross-over         | No run-in             | 5              | Feeding           | Multiple 24h                  | Supine              |
| Ruppert 1993             | Cross-over         | No run-in             | 4              | Feeding           | Single 24h                    | Sitting             |
| Sacks 2001 (DASH) 100    | Cross-over         | Run-in - High Na diet | 4              | Feeding           | Single 24h                    | Sitting             |
| Sacks 2001 (DASH) 150    | Cross-over         | Run-in - High Na diet | 4              | Feeding           | Single 24h                    | Sitting             |
| Santos 2010              | Cross-over         | No run-in             | 7              | Feeding           | Single 24h                    | Supine              |
| Schorr 1996              | Cross-over         | No run-in             | 4              | Feeding           | Multiple 24h                  | NR                  |
| Swift 2005               | Cross-over         | Run-in - Low Na diet  | 4              | Feeding           | Not reported                  | Supine              |
| van Berge-Landry 2004    | Cross-over         | Run-in - Normal diet  | 4              | Counselling       | Single 24h                    | NR                  |
| Watt 1983                | Cross-over         | Run-in - Low Na diet  | 4              | Feeding           | Single 24h                    | Sitting             |
| Watt 1985 (high/high)    | Cross-over         | No run-in             | 4              | Feeding           | Single 24h                    | Sitting             |
| Watt 1985 (low/low)      | Cross-over         | No run-in             | 4              | Feeding           | Single 24h                    | Sitting             |

| Study                    | Mean BMI                | Mean baseline K excretion | Achieved UNa | UNa mean diff. | SBP mean diff. | SBP mean diff. SE | DBP mean diff. | DBP mean diff. SE |
|--------------------------|-------------------------|---------------------------|--------------|----------------|----------------|-------------------|----------------|-------------------|
|                          | <i>kg/m<sup>2</sup></i> | <i>mmol/day</i>           |              |                |                |                   |                |                   |
| Alli 1992                | 25                      | 61.2                      | 186.5        | 13.3           | -2.2           | 3.2               | -3.9           | 1.9               |
| ANHMRCDS 1986            | -                       | 66                        | 85.8         | -69.8          | -4.0           | 1.5               | -4.0           | 0.9               |
| ANHMRCDS 1989            | -                       | 73                        | 90           | -63            | -3.1           | 2.7               | -3.2           | 1.1               |
| Benetos 1992             | -                       | 70                        | 85           | -78            | -6.5           | 3.5               | -3.7           | 2.0               |
| Cappuccio 1997           | -                       | 66                        | 94           | -83            | -7.3           | 4.4               | -3.2           | 2.0               |
| Cobiac 1992              | 25                      | 74                        | 79           | -73            | -4.7           | 3.7               | -0.2           | 2.8               |
| Dickinson 2014           | -                       | 76                        | 113          | -42            | -3.0           | 3.8               | -1.0           | 2.0               |
| Erwtaman 1984            | -                       | -                         | 72           | -58            | -1.9           | 3.3               | -1.5           | 2.3               |
| Fotherby 1993            | -                       | 66                        | 95           | -79            | -8.0           | 6.7               | 0.0            | 3.3               |
| Gates 2004               | 25.1                    | 72                        | 60.5         | -89.6          | -7.1           | 4.6               | -0.9           | 2.9               |
| Gijsbers 2015            | 27.2                    | 81.8                      | 105.1        | -97.8          | -7.8           | 3.9               | -3.4           | 1.8               |
| Grobbee 1987             | -                       | 71                        | 57           | -72            | -0.9           | 2.5               | 0.2            | 2.3               |
| He 2009                  | 29                      | 77                        | 110          | -55            | -5.0           | 1.4               | -3.0           | 0.9               |
| Jablonski 2013           | 27.2                    | -                         | 77           | -67            | -11.0          | 5.8               | -4.0           | 2.8               |
| Kumanyika 1993 (TOHP I)  | 27.1                    | 61.8                      | 99.4         | -47.1          | -2.4           | 0.6               | -1.4           | 0.4               |
| Kumanyika 2005 (TOHP II) | -                       | 66.8                      | 135.2        | -42.3          | -0.9           | 0.6               | -0.3           | 0.4               |
| MacGregor 1982           | -                       | 59                        | 86           | -76            | -10.0          | 5.6               | -5.0           | 2.9               |
| MacGregor 1989 100       | -                       | -                         | 49           | -59            | -8.0           | 6.4               | -4.0           | 3.4               |
| MacGregor 1989 200       | -                       | -                         | 49           | -141           | -16.0          | 6.9               | -9.0           | 3.4               |
| Meland 1997              | -                       | -                         | 125          | -66            | -4.0           | 5.1               | -2.0           | 2.2               |
| Melander 2007            | 26.3                    | 75                        | 50.7         | -89.3          | -7.0           | 3.1               | -2.2           | 1.7               |
| Nestel 1993              | 24.5                    | 87                        | 91.5         | -64.5          | -5.0           | 2.9               | -3.0           | 2.1               |
| Parijs 1973              | -                       | -                         | 92.8         | -98.3          | -6.7           | 7.9               | 3.2            | 4.9               |
| Puska 1983               | -                       | 81                        | 77           | -90            | 1.2            | 3.4               | -0.4           | 2.3               |
| Richards 1984            | -                       | -                         | 94           | -108.8         | -5.2           | 5.8               | -1.8           | 5.0               |
| Ruppert 1993             | -                       | -                         | 82           | -117.6         | 1.7            | 3.3               | 1.0            | 2.3               |
| Sacks 2001 (DASH) 100    | 30                      | -                         | 64           | -42            | -4.0           | 1.3               | -2.2           | 0.8               |
| Sacks 2001 (DASH) 150    | 30                      | -                         | 64           | -77            | -6.7           | 1.3               | -3.4           | 0.8               |
| Santos 2010              | -                       | -                         | 115          | -23            | -0.3           | 8.6               | 4.5            | 3.8               |
| Schorr 1996              | 26.1                    | -                         | 104.6        | -70.6          | -7.7           | 7.3               | -1.7           | 4.0               |
| Swift 2005               | 28                      | 63                        | 89           | -78            | -8.0           | 2.9               | -3.0           | 1.8               |
| van Berge-Landry 2004    | -                       | -                         | 24           | -285           | -16.0          | 2.5               | -8.0           | 1.5               |
| Watt 1983                | -                       | 59.2                      | 87.2         | -55.6          | -0.5           | 1.5               | -0.3           | 0.8               |
| Watt 1985 (high/high)    | -                       | 53.8                      | 56.3         | -74.3          | -1.4           | 0.7               | 1.2            | 0.9               |
| Watt 1985 (low/low)      | -                       | 60                        | 68.4         | -60            | -0.5           | 0.8               | 1.4            | 0.9               |

## Appendix B – Trial arms summary data

Mean UNa values at baseline and end of trial, mean BP and related standard deviations of 68 arms (from 35 RCTs comparisons) included in arm-level meta-analyses and in the dose-response modelling.

| Study arm                | Subjects per arm | Baseline mean UNa | Achieved mean UNa | Achieved mean SBP | Achieved SBP SD | Achieved mean DBP | Achieved DBP SD |
|--------------------------|------------------|-------------------|-------------------|-------------------|-----------------|-------------------|-----------------|
|                          |                  | <i>mmol/d</i>     | <i>mmol/d</i>     | <i>mm Hg</i>      | <i>mm Hg</i>    | <i>mm Hg</i>      | <i>mm Hg</i>    |
| Alli 1992*               | 26               | 177.2             | 186.5             | 144.4             | 8.1             | 90.6              | 8.2             |
| Alli 1992*               | 30               | 174               | 173.2             | 146.6             | 15.1            | 94.5              | 5.3             |
| ANHMRCDs 1986            | 48               | 142               | 85.8              | 144               | 7.2             | 89                | 4.3             |
| ANHMRCDs 1986            | 52               | 157               | 155.6             | 148               | 7.4             | 93                | 4.5             |
| ANHMRCDs 1989            | 50               | 142               | 90                | 149.1             | 13.4            | 91.4              | 4.9             |
| ANHMRCDs 1989            | 53               | 134               | 153               | 152.2             | 13.8            | 94.6              | 6.6             |
| Benetos 1992             | 20               | 173               | 85                | 142.6             | 11.6            | 89.5              | 6.7             |
| Benetos 1992             | 20               | 173               | 163               | 149.1             | 10.3            | 93.2              | 5.8             |
| Cappuccio 1997           | 47               | 72                | 94                | 155.9             | 21.6            | 86.9              | 8.8             |
| Cappuccio 1997           | 47               | 72                | 177               | 163.2             | 20.6            | 90.1              | 10.5            |
| Cobiac 1992              | 26               | 166               | 79                | 127.8             | 10.6            | 77.1              | 10.2            |
| Cobiac 1992              | 28               | 166               | 152               | 132.5             | 15.9            | 77.3              | 10.6            |
| Dickinson 2014           | 25               | 154               | 113               | 115               | 10              | 73                | 6               |
| Dickinson 2014           | 25               | 154               | 155               | 118               | 16              | 74                | 8               |
| Erwtaman 1984            | 44               |                   | 72                | 141               | 15.4            | 92.9              | 10.4            |
| Erwtaman 1984            | 50               |                   | 130               | 142.9             | 16.4            | 94.4              | 12              |
| Fotherby 1993            | 17               | 104               | 95                | 171               | 21              | 96                | 8               |
| Fotherby 1993            | 17               | 104               | 174               | 179               | 18              | 96                | 11              |
| Gates 2004               | 12               | 134.5             | 60.5              | 137.1             | 9.7             | 79                | 7.3             |
| Gates 2004               | 12               | 134.5             | 150.1             | 144.2             | 12.8            | 79.9              | 6.9             |
| Gijsbers 2015            | 36               | 90.8              | 105.1             | 125.1             | 15              | 72.3              | 7.7             |
| Gijsbers 2015            | 36               | 90.8              | 202.9             | 132.9             | 17.6            | 75.7              | 7.5             |
| Grobbée 1987             | 40               | 141               | 57                | 135.9             | 11.4            | 73.7              | 9.5             |
| Grobbée 1987             | 40               | 141               | 129               | 136.8             | 11.4            | 73.5              | 11.4            |
| He 2009                  | 169              |                   | 110               | 141               | 12              | 88                | 9               |
| He 2009                  | 169              |                   | 165               | 146               | 13              | 91                | 8               |
| Jablonski 2013           | 11               | 159               | 77                | 127               | 9.9             | 77                | 6.6             |
| Jablonski 2013           | 11               | 159               | 144               | 138               | 16.6            | 81                | 6.6             |
| Kumanyika 1993 (TOHP I)  | 304              | 154.6             | 99.4              | 119.7             | 7.94            | 79.3              | 5.65            |
| Kumanyika 1993 (TOHP I)  | 395              | 156.4             | 146.5             | 122.1             | 8.31            | 80.7              | 5.8             |
| Kumanyika 2005 (TOHP II) | 515              | 186.1             | 135.2             | 127               | 9.2             | 83.1              | 6.5             |
| Kumanyika 2005 (TOHP II) | 514              | 188               | 177.5             | 127.9             | 8.5             | 83.4              | 7               |
| MacGregor 1982           | 19               | 83                | 86                | 144               | 17.4            | 92                | 6.5             |
| MacGregor 1982           | 19               | 83                | 162               | 154               | 17.4            | 97                | 10.9            |
| MacGregor 1989 50        | 20               |                   | 49                | 147               | 17.9            | 91                | 8.9             |
| MacGregor 1989 100       | 20               |                   | 108               | 155               | 13.4            | 95                | 8.9             |
| MacGregor 1989 200       | 20               |                   | 190               | 163               | 17.9            | 100               |                 |

|                        |     |       |       |       |       |       |       |
|------------------------|-----|-------|-------|-------|-------|-------|-------|
| Meland 1997            | 16  | 177   | 125   | 141   | 12.2  | 92    | 5.1   |
| Meland 1997            | 16  | 177   | 191   | 145   | 16.3  | 94    | 7.1   |
| Melander 2007          | 39  | 165   | 50.7  | 125   | 12.4  | 73    | 7.3   |
| Melander 2007          | 39  | 165   | 140   | 132   | 14.7  | 75.2  | 7.5   |
| Nestel 1993            | 32  | 182.5 | 91.5  | 123   | 9     | 72    | 8     |
| Nestel 1993            | 34  | 162   | 156   | 128   | 14    | 75    | 9     |
| Parijs 1973            | 15  |       | 92.8  | 167.8 | 24.3  | 115.5 | 12.45 |
| Parijs 1973            | 17  |       | 191.1 | 174.5 | 20.02 | 112.3 | 15.17 |
| Puska 1983*            | 34  | 192   | 77    | 137.2 | 15.7  | 86.5  | 10.5  |
| Puska 1983*            | 38  | 165   | 167   | 136   | 12.9  | 86.9  | 9.2   |
| Richards 1984*         | 12  |       | 94    | 144.7 | 13.9  | 90.6  | 12.5  |
| Richards 1984*         | 12  |       | 202.8 | 149.9 | 14.5  | 92.4  | 12.1  |
| Ruppert 1993           | 25  |       | 82    | 112   | 10.5  | 73.3  | 7     |
| Ruppert 1993           | 25  |       | 199.6 | 110.3 | 13    | 72.3  | 9     |
| Sacks 2001 (DASH) 50   | 192 | 152   | 64    | 126   | 10    | 79.8  | 6     |
| Sacks 2001 (DASH) 100  | 192 | 152   | 106   | 130   | 11.7  | 82    | 6.4   |
| Sacks 2001 (DASH) 150  | 192 | 152   | 141   | 132.7 | 11.9  | 83.2  |       |
| Santos 2010            | 17  |       | 115   | 112.1 | 26.1  | 71.5  | 10.1  |
| Santos 2010            | 17  |       | 138   | 112.4 | 24.2  | 67    | 12.2  |
| Schorr 1996            | 16  | 141.8 | 104.6 | 125.9 | 17.3  | 69.5  | 10.1  |
| Schorr 1996            | 16  | 141.8 | 175.2 | 133.6 | 23.7  | 71.2  | 12.2  |
| Swift 2005             | 40  |       | 89    | 151   | 13    | 98    | 8     |
| Swift 2005             | 40  |       | 167   | 159   | 13    | 101   | 8     |
| van Berge-Landry 2004* | 48  |       | 24    | 128   | 10    | 85    | 7     |
| van Berge-Landry 2004* | 48  |       | 309   | 144   | 14    | 93    | 8     |
| Watt 1983              | 18  |       | 87.2  | 136   | 4.6   | 82.3  | 2.4   |
| Watt 1983              | 18  |       | 142.8 | 136.5 | 4.5   | 82.6  | 2.4   |
| Watt 1985 (high/high)  | 35  | 129.7 | 56.3  | 112.2 | 3.1   | 64.5  | 3.89  |
| Watt 1985 (high/high)  | 35  | 129.7 | 130.6 | 113.6 | 3.1   | 63.3  | 3.89  |
| Watt 1985 (low/low)    | 31  | 151.1 | 68.4  | 110.2 | 3.23  | 65    | 3.54  |
| Watt 1985 (low/low)    | 31  | 151.1 | 128.4 | 110.7 | 3.23  | 63.6  | 3.54  |

\*excluded from the dose-response models (van Berge-Landry used in sensitivity analyses)

## Appendix C - Outcome of RCTs RoB assessment

| References               | Risk of bias domains |                        |          |           |          |         |           |                                    | Tier |
|--------------------------|----------------------|------------------------|----------|-----------|----------|---------|-----------|------------------------------------|------|
|                          | Randomisation        | Allocation concealment | Blinding | Attrition | Exposure | Outcome | Reporting | Other threats to internal validity |      |
| Alli 1992                | +                    | --                     | --       | --        | ++       | --      | ++        | -                                  | 2    |
| ANHMRCDS 1986            | +                    | NR                     | ++       | +         | +        | ++      | ++        | +                                  | 1    |
| ANHMRCDS 1989            | +                    | NR                     | +        | ++        | +        | +       | ++        | +                                  | 1    |
| Benetos 1992             | ++                   | NR                     | ++       | ++        | +        | ++      | ++        | ++                                 | 1    |
| Cappuccio 1997           | +                    | NR                     | -        | ++        | +        | +       | +         | +                                  | 1    |
| Cobiac 1992              | NR                   | NR                     | ++       | +         | ++       | +       | ++        | +                                  | 2    |
| Dickinson 2014           | ++                   | NR                     | +        | -         | +        | +       | ++        | ++                                 | 1    |
| Erwteman 1984            | +                    | NR                     | +        | +         | +        | ++      | ++        | -                                  | 1    |
| Fotherby 1993            | +                    | NR                     | +        | ++        | +        | +       | ++        | ++                                 | 1    |
| Gates 2004               | +                    | +                      | ++       | ++        | +        | ++      | ++        | ++                                 | 1    |
| Gijsbers 2015            | ++                   | ++                     | ++       | ++        | +        | ++      | ++        | ++                                 | 1    |
| Grobbee 1987             | +                    | NR                     | +        | ++        | +        | ++      | -         | ++                                 | 1    |
| He 2009                  | ++                   | +                      | ++       | +         | +        | ++      | ++        | ++                                 | 1    |
| Jablonski 2013           | ++                   | +                      | ++       | +         | +        | ++      | ++        | ++                                 | 1    |
| Kumanyika 1993 (TOHP I)  | +                    | NR                     | ++       | ++        | +        | ++      | ++        | ++                                 | 1    |
| Kumanyika 2005 (TOHP II) | ++                   | ++                     | +        | ++        | +        | ++      | ++        | +                                  | 1    |
| MacGregor 1982           | ++                   | ++                     | +        | ++        | +        | ++      | ++        | +                                  | 1    |
| MacGregor 1989 100       | +                    | NR                     | +        | ++        | +        | ++      | ++        | ++                                 | 1    |
| MacGregor 1989 200       | +                    | NR                     | +        | ++        | +        | ++      | ++        | ++                                 | 1    |
| Meland 1997              | +                    | NR                     | +        | ++        | +        | +       | ++        | ++                                 | 1    |
| Melander 2007            | +                    | NR                     | ++       | +         | +        | ++      | ++        | ++                                 | 1    |
| Nestel 1993              | NR                   | NR                     | +        | ++        | ++       | +       | ++        | +                                  | 2    |
| Parijs 1973              | +                    | NR                     | -        | +         | +        | -       | ++        | +                                  | 1    |
| Puska 1983               | +                    | NR                     | +        | ++        | ++       | +       | ++        | -                                  | 1    |
| Richards 1984            | -                    | -                      | -        | +         | +        | +       | +         | +                                  | 2    |
| Ruppert 1993             | +                    | NR                     | +        | +         | +        | +       | ++        | ++                                 | 1    |
| Sacks 2001 (DASH) 100    | +                    | +                      | +        | ++        | +        | ++      | ++        | ++                                 | 1    |
| Sacks 2001 (DASH) 150    | +                    | NR                     | -        | ++        | +        | +       | ++        | +                                  | 1    |
| Santos 2010              | +                    | NR                     | +        | +         | +        | +       | ++        | +                                  | 1    |
| Schorr 1996              | +                    | NR                     | ++       | ++        | +        | +       | ++        | ++                                 | 1    |
| Swift 2005               | +                    | NR                     | -        | ++        | +        | NR      | ++        | +                                  | 2    |
| van Berge-Landry 2004    | +                    | NR                     | +        | ++        | +        | +       | ++        | ++                                 | 1    |



## Appendix D - Summary of meta-analyses results at study-level

**Table 3:** Subgroup analyses results for **systolic blood pressure** are summarised below and displayed in forest plots in Appendix E.  $I^2$  is the estimated proportion of variance due to heterogeneity in each subgroup; the p value of the test for heterogeneity based on Cochran's Q statistic is reported in the last column.

|                          | Subgroups              | N studies | N subjects  | Mean diff.   | 95% CI       |             | $I^2$      | p                 |
|--------------------------|------------------------|-----------|-------------|--------------|--------------|-------------|------------|-------------------|
| <b>All</b>               | Adults                 | 35        | 3407        | -3.9         | -5.1         | -2.8        | 62%        | < 0.001           |
| <b>BP</b>                | Hypertensive           | 17        | 721         | -5.6         | -8.1         | -3.1        | 58%        | 0.001             |
|                          | Mixed                  | 10        | 770         | -3.5         | -5.4         | -1.7        | 67%        | 0.001             |
|                          | Normotensive           | 8         | 1916        | -2.0         | -3.3         | -0.7        | 26%        | 0.218             |
| <b>Age</b>               | Adults < 50 yrs        | 16        | 632         | -2.2         | -3.3         | -1.1        | 49%        | 0.014             |
|                          | Adults ≥ 50 yrs        | 19        | 2775        | -6.1         | -8.2         | -4.1        | 50%        | 0.007             |
| <b>Sex</b>               | > 55% men              | 14        | 2430        | -4.5         | -6.5         | -2.6        | 74%        | < 0.001           |
|                          | 45–55% both genders    | 14        | 761         | -4.7         | -7.0         | -2.5        | 55%        | 0.007             |
|                          | > 55% women            | 7         | 216         | -1.8         | -3.6         | 0.0         | 20%        | 0.277             |
| <b>BMI</b>               | < 25                   | 1         | 66          | -5.0         | -10.6        | 0.6         | -          | -                 |
|                          | 25–29                  | 10        | 1132        | -4.6         | -6.3         | -2.8        | 26%        | 0.207             |
|                          | ≥ 30                   | 2         | 384         | -5.3         | -8.0         | -2.7        | 52%        | 0.151             |
|                          | <b>Not reported</b>    | <b>22</b> | <b>1825</b> | <b>-3.1</b>  | <b>-4.7</b>  | <b>-1.6</b> | <b>62%</b> | <b>&lt; 0.001</b> |
| <b>Ethnicity</b>         | Caucasian              | 3         | 65          | -7.6         | -12.9        | -2.3        | 0%         | 0.991             |
|                          | African (including AA) | 1         | 40          | -8.0         | -13.7        | -2.3        | -          | -                 |
|                          | Mixed                  | 12        | 2540        | -5.7         | -8.0         | -3.4        | 82%        | < 0.001           |
|                          | <b>Not reported</b>    | <b>19</b> | <b>762</b>  | <b>-1.7</b>  | <b>-2.5</b>  | <b>-0.8</b> | <b>0%</b>  | <b>0.578</b>      |
| <b>Potassium</b>         | ≤ 60 mmol/d            | 4         | 103         | -1.0         | -2.1         | 0.1         | 9%         | 0.346             |
|                          | >60–≤ 70 mmol/d        | 8         | 2008        | -3.0         | -4.6         | -1.4        | 52%        | 0.043             |
|                          | >70–≤ 80 mmol/d        | 7         | 442         | -4.3         | -6.2         | -2.5        | 0%         | 0.743             |
|                          | > 80 mmol/d            | 3         | 174         | -3.8         | -8.7         | 1.2         | 41%        | 0.183             |
|                          | <b>Not reported</b>    | <b>13</b> | <b>680</b>  | <b>-6.4</b>  | <b>-9.5</b>  | <b>-3.3</b> | <b>59%</b> | <b>0.004</b>      |
| <b>Design</b>            | Parallel               | 8         | 2217        | -2.0         | -3.1         | -1.0        | 20%        | 0.272             |
|                          | Cross-over             | 26        | 1134        | -5.0         | -6.8         | -3.3        | 67%        | < 0.001           |
|                          | Cluster-randomized     | 1         | 56          | -2.2         | -8.4         | 4.0         | -          | -                 |
| <b>Specific design</b>   | Run-in - Normal diet   | 7         | 380         | -5.2         | -9.6         | -0.9        | 75%        | 0.001             |
|                          | Run-in – Low Na diet   | 9         | 386         | -5.8         | -8.6         | -2.9        | 43%        | 0.083             |
|                          | Run-in – High Na diet  | 4         | 504         | -5.3         | -7.0         | -3.6        | 0%         | 0.552             |
|                          | No run-in              | 15        | 2137        | -1.6         | -2.5         | -0.8        | 18%        | 0.254             |
| <b>Duration</b>          | 1 month                | 20        | 1005        | -5.1         | -7.0         | -3.1        | 72%        | < 0.001           |
|                          | 2-3 months             | 12        | 618         | -4.0         | -5.5         | -2.5        | 0%         | 0.755             |
|                          | ≥ 1 year               | 3         | 1784        | -1.6         | -2.8         | -0.4        | 40%        | 0.191             |
| <b>Intervention type</b> | Feeding                | 28        | 1309        | -4.0         | -5.3         | -2.7        | 44%        | 0.007             |
|                          | Counselling            | 7         | 2098        | -3.7         | -6.2         | -1.1        | 85%        | < 0.001           |
| <b>Position</b>          | Supine                 | 17        | 517         | -5.6         | -7.5         | -3.6        | 0%         | 0.762             |
|                          | Seated                 | 16        | 2826        | -2.5         | -3.6         | -1.5        | 57%        | 0.003             |
|                          | <b>Not reported</b>    | <b>2</b>  | <b>64</b>   | <b>-14.7</b> | <b>-20.6</b> | <b>-8.8</b> | <b>13%</b> | <b>0.284</b>      |

|                                      |                      |           |             |             |              |             |            |              |
|--------------------------------------|----------------------|-----------|-------------|-------------|--------------|-------------|------------|--------------|
| <b>UNa difference</b>                | <=50 mmol            | 6         | 2018        | -2.0        | -3.0         | -0.9        | 23%        | 0.26         |
|                                      | 51–75 mmol           | 14        | 773         | -2.4        | -3.6         | -1.2        | 27%        | 0.169        |
|                                      | 76–100 mmol          | 11        | 511         | -6.5        | -8.3         | -4.7        | 0%         | 0.814        |
|                                      | > 100 mmol           | 4         | 105         | -8.6        | -19.0        | 1.7         | 85%        | < 0.001      |
| <b>Tier</b>                          | Tier 1               | 30        | 3171        | -3.3        | -4.4         | -2.2        | 50%        | 0.001        |
|                                      | Tier 2               | 5         | 236         | -6.9        | -12.8        | -1.1        | 75%        | 0.003        |
| <b>RoB outcome</b>                   | Definitively low RoB | 18        | 2788        | -3.4        | -4.6         | -2.1        | 62%        | 0            |
|                                      | Probably low RoB     | 14        | 498         | -3.1        | -4.6         | -1.6        | 0%         | 0.48         |
|                                      | High or NR RoB       | 3         | 121         | -8.7        | -19.4        | 2.0         | 83%        | 0.003        |
| <b>Baseline SBP</b>                  | <140 mmHg            | 14        | 2497        | -2.9        | -4.1         | -1.6        | 61%        | 0.001        |
|                                      | >=140 mmHg           | 14        | 581         | -4.2        | -5.9         | -2.4        | 0%         | 0.787        |
|                                      | <b>Not reported</b>  | <b>7</b>  | <b>329</b>  | <b>-5.2</b> | <b>-9.9</b>  | <b>-0.6</b> | <b>82%</b> | <b>0</b>     |
| <b>Baseline UNa</b>                  | <100 mmol/d          | 3         | 102         | -8.1        | -13.1        | -3.0        | 0%         | 0.926        |
|                                      | 100-149 mmol/d       | 7         | 323         | -2.1        | -3.3         | -0.9        | 0%         | 0.486        |
|                                      | >=150 mmol/d         | 14        | 2502        | -3.1        | -4.5         | -1.7        | 59%        | 0.003        |
|                                      | <b>Not reported</b>  | <b>11</b> | <b>480</b>  | <b>-5.7</b> | <b>-9.4</b>  | <b>-1.9</b> | <b>73%</b> | <b>0</b>     |
| <b>Achieved Una in High Na group</b> | <=3 g/day            | 6         | 412         | -1.6        | -2.8         | -0.4        | 19%        | 0.291        |
|                                      | >3 & <=3.6 g/day     | 12        | 1336        | -3.8        | -5.3         | -2.3        | 34%        | 0.116        |
|                                      | >3.6 & <4.4 g/day    | 10        | 1485        | -4.2        | -6.7         | -1.6        | 56%        | 0.015        |
|                                      | >4.4 g/day           | 7         | 174         | -7.6        | -13.8        | -1.4        | 71%        | 0.002        |
| <b>Achieved Una in Low Na group</b>  | <=1.7 g/day          | 10        | 629         | -5.4        | -8.2         | -2.6        | 84%        | 0            |
|                                      | >1.7 & <=2 g/day     | 10        | 453         | -3.3        | -5.6         | -1.0        | 38%        | 0.109        |
|                                      | >2 & <=2.3 g/day     | 7         | 961         | -2.7        | -3.8         | -1.6        | 0%         | 0.799        |
|                                      | >2.3 g/day           | 8         | 1364        | -3.1        | -5.4         | -0.8        | 39%        | 0.117        |
| <b>N of urinary collections</b>      | Multiple 24h         | 21        | 1848        | -4.8        | -6.7         | -3.0        | 0%         | 0.629        |
|                                      | Single 24h           | 12        | 490         | -3.8        | -5.3         | -2.3        | 68%        | 0            |
|                                      | <b>Not reported</b>  | <b>2</b>  | <b>1069</b> | <b>-3.9</b> | <b>-10.7</b> | <b>3.0</b>  | <b>83%</b> | <b>0.016</b> |
| <b>Year of publication</b>           | Before 1995          | 20        | 1518        | -2.0        | -2.9         | -1.1        | 11%        | 0.314        |
|                                      | After 1995           | 15        | 1889        | -6.3        | -8.8         | -3.8        | 78%        | 0            |
| <b>Funding</b>                       | Public               | 13        | 2613        | -4.4        | -6.3         | -2.6        | 77%        | 0            |
|                                      | Profit               | 3         | 104         | -5.6        | -10.0        | -1.3        | 0%         | 0.739        |
|                                      | Non-profit           | 7         | 221         | -1.7        | -4.9         | 1.4         | 18%        | 0.299        |
|                                      | Mixed                | 2         | 101         | -2.1        | -3.9         | -0.4        | 35%        | 0.159        |
|                                      | <b>Not reported</b>  | <b>10</b> | <b>368</b>  | <b>-5.2</b> | <b>-8.8</b>  | <b>-1.6</b> | <b>24%</b> | <b>0.241</b> |

**Table 4:** Subgroup analyses results for **diastolic blood pressure** are summarised below and displayed in forest plots in Appendix E.  $I^2$  is the estimated proportion of variance due to heterogeneity in each subgroup; the p value of the test for heterogeneity based on Cochran's Q statistic is reported in the last column.

|                          | Subgroups              | N studies | N subjects  | Mean diff.  | 95% CI       |             | $I^2$      | p                 |
|--------------------------|------------------------|-----------|-------------|-------------|--------------|-------------|------------|-------------------|
| <b>All</b>               | Adults                 | 35        | 3407        | -2.0        | -2.8         | -1.2        | 61%        | < 0.001           |
| <b>BP</b>                | Hypertensive           | 17        | 721         | -2.9        | -4.2         | -1.6        | 47%        | 0.016             |
|                          | Mixed                  | 10        | 770         | -1.7        | -3.3         | -0.2        | 75%        | < 0.001           |
|                          | Normotensive           | 8         | 1916        | -0.9        | -1.6         | -0.2        | 9%         | 0.365             |
| <b>Age</b>               | Adults < 50 yrs        | 16        | 632         | -1.0        | -2.0         | 0.0         | 61%        | 0.001             |
|                          | Adults ≥ 50 yrs        | 19        | 2775        | -2.9        | -4.0         | -1.9        | 40%        | 0.036             |
| <b>Sex</b>               | > 55% men              | 14        | 2430        | -2.7        | -3.9         | -1.5        | 70%        | < 0.001           |
|                          | 45–55% both genders    | 14        | 761         | -1.9        | -3.3         | -0.5        | 53%        | 0.01              |
|                          | > 55% women            | 7         | 216         | -0.6        | -2.0         | 0.8         | 33%        | 0.173             |
| <b>BMI</b>               | < 25                   | 1         | 66          | -3.0        | -7.1         | 1.1         | -          | -                 |
|                          | 25–29                  | 10        | 1132        | -1.9        | -2.6         | -1.2        | 0%         | 0.739             |
|                          | ≥ 30                   | 2         | 384         | -2.8        | -4.0         | -1.6        | 16%        | 0.276             |
|                          | <b>Not reported</b>    | <b>22</b> | <b>1825</b> | <b>-1.7</b> | <b>-2.8</b>  | <b>-0.5</b> | <b>69%</b> | <b>&lt; 0.001</b> |
| <b>Ethnicity</b>         | Caucasian              | 3         | 65          | -2.2        | -4.9         | 0.5         | 0%         | 0.579             |
|                          | African (including AA) | 1         | 40          | -3.0        | -6.5         | 0.5         | -          | -                 |
|                          | Mixed                  | 12        | 2540        | -3.0        | -4.2         | -1.7        | 74%        | < 0.001           |
|                          | <b>Not reported</b>    | <b>19</b> | <b>762</b>  | <b>-1.2</b> | <b>-2.3</b>  | <b>0.0</b>  | <b>54%</b> | <b>0.003</b>      |
| <b>Potassium</b>         | ≤ 60 mmol/d            | 4         | 103         | 0.4         | -1.1         | 1.9         | 51%        | 0.105             |
|                          | >60–≤ 70 mmol/d        | 8         | 2008        | -2.2        | -3.4         | -0.9        | 66%        | 0.005             |
|                          | >70–≤ 80 mmol/d        | 7         | 442         | -2.4        | -3.5         | -1.3        | 0%         | 0.742             |
|                          | > 80 mmol/d            | 3         | 174         | -2.5        | -4.8         | -0.2        | 0%         | 0.573             |
|                          | <b>Not reported</b>    | <b>13</b> | <b>680</b>  | <b>-2.9</b> | <b>-4.5</b>  | <b>-1.2</b> | <b>51%</b> | <b>0.017</b>      |
| <b>Design</b>            | Parallel               | 8         | 2217        | -1.8        | -3.0         | -0.7        | 63%        | 0.009             |
|                          | Cross-over             | 26        | 1134        | -2.0        | -3.1         | -0.9        | 61%        | < 0.001           |
|                          | Cluster-randomized     | 1         | 56          | -3.9        | -7.6         | -0.2        | -          | -                 |
| <b>Specific design</b>   | Run-in – Normal diet   | 7         | 380         | -3.6        | -5.4         | -1.7        | 55%        | 0.036             |
|                          | Run-in – Low Na diet   | 9         | 386         | -2.7        | -4.1         | -1.2        | 38%        | 0.119             |
|                          | Run-in – High Na diet  | 4         | 504         | -2.7        | -3.7         | -1.7        | 0%         | 0.57              |
|                          | No run-in              | 15        | 2137        | -0.5        | -1.3         | 0.3         | 30%        | 0.131             |
| <b>Duration</b>          | 1 month                | 20        | 1005        | -2.1        | -3.4         | -0.8        | 67%        | < 0.001           |
|                          | 2-3 months             | 12        | 618         | -2.8        | -3.7         | -1.9        | 0%         | 0.501             |
|                          | ≥ 1 year               | 3         | 1784        | -1.1        | -2.3         | 0.1         | 66%        | 0.052             |
| <b>Intervention type</b> | Feeding                | 28        | 1309        | -1.7        | -2.6         | -0.9        | 46%        | 0.004             |
|                          | Counselling            | 7         | 2098        | -2.7        | -4.4         | -1.0        | 83%        | < 0.001           |
| <b>Position</b>          | Supine                 | 17        | 517         | -2.7        | -3.8         | -1.5        | 0%         | 0.66              |
|                          | Seated                 | 16        | 2826        | -1.4        | -2.3         | -0.5        | 70%        | < 0.001           |
|                          | <b>Not reported</b>    | <b>2</b>  | <b>64</b>   | <b>-5.9</b> | <b>-11.7</b> | <b>-0.1</b> | <b>55%</b> | <b>0.138</b>      |
| <b>UNa difference</b>    | ≤50 mmol               | 6         | 2018        | -1.3        | -2.3         | -0.2        | 52%        | 0.063             |

|                                      |                      |           |             |             |             |             |            |              |
|--------------------------------------|----------------------|-----------|-------------|-------------|-------------|-------------|------------|--------------|
|                                      | 51–75 mmol           | 14        | 773         | -1.5        | -2.8        | -0.2        | 64%        | 0.001        |
|                                      | 76–100 mmol          | 11        | 511         | -2.9        | -3.9        | -1.9        | 0%         | 0.869        |
|                                      | > 100 mmol           | 4         | 105         | -4.6        | -10.1       | 0.8         | 76%        | 0.006        |
| <b>Tier</b>                          | Tier 1               | 30        | 3171        | -1.7        | -2.4        | -0.9        | 56%        | < 0.001      |
|                                      | Tier 2               | 5         | 236         | -4.1        | -7.0        | -1.2        | 52%        | 0.081        |
| <b>RoB outcome</b>                   | Definitively low RoB | 18        | 2788        | -1.8        | -2.7        | -0.9        | 64%        | 0            |
|                                      | Probably low RoB     | 14        | 498         | -1.7        | -2.8        | -0.5        | 23%        | 0.209        |
|                                      | High or NR RoB       | 3         | 121         | -4.5        | -9.2        | 0.3         | 69%        | 0.039        |
| <b>Baseline SBP</b>                  | <90 mmHg             | 17        | 2596        | -1.2        | -2.1        | -0.4        | 53%        | 0.005        |
|                                      | >=90 mmHg            | 11        | 482         | -3.5        | -4.6        | -2.4        | 0%         | 0.677        |
|                                      | <b>Not reported</b>  | <b>7</b>  | <b>329</b>  | <b>-2.1</b> | <b>-4.7</b> | <b>0.4</b>  | <b>77%</b> | <b>0</b>     |
| <b>Baseline UNa</b>                  | <100 mmol/d          | 3         | 102         | -3.6        | -6.0        | -1.2        | 0%         | 0.868        |
|                                      | 100-149 mmol/d       | 7         | 323         | -1.4        | -3.6        | 0.8         | 69%        | 0.004        |
|                                      | >=150 mmol/d         | 14        | 2502        | -1.6        | -2.5        | -0.7        | 55%        | 0.007        |
|                                      | <b>Not reported</b>  | <b>11</b> | <b>480</b>  | <b>-2.4</b> | <b>-4.5</b> | <b>-0.3</b> | <b>68%</b> | <b>0.001</b> |
| <b>Achieved Una in High Na group</b> | <=3 g/day            | 6         | 412         | -0.3        | -2.1        | 1.5         | 64%        | 0.017        |
|                                      | >3 & <=3.6 g/day     | 12        | 1336        | -2.1        | -3.1        | -1.1        | 46%        | 0.043        |
|                                      | >3.6 & <4.4 g/day    | 10        | 1485        | -2.2        | -3.6        | -0.9        | 44%        | 0.067        |
|                                      | >4.4 g/day           | 7         | 174         | -3.4        | -6.6        | -0.2        | 65%        | 0.009        |
| <b>Achieved Una in Low Na group</b>  | <=1.7 g/day          | 10        | 629         | -2.3        | -4.3        | -0.3        | 82%        | 0            |
|                                      | >1.7 & <=2 g/day     | 10        | 453         | -2.1        | -3.5        | -0.7        | 40%        | 0.093        |
|                                      | >2 & <=2.3 g/day     | 7         | 961         | -1.7        | -2.4        | -0.9        | 0%         | 0.62         |
|                                      | >2.3 g/day           | 8         | 1364        | -1.8        | -3.3        | -0.2        | 50%        | 0.053        |
| <b>N of urinary collections</b>      | Multiple 24h         | 21        | 1848        | -1.9        | -2.9        | -0.9        | 69%        | 0            |
|                                      | Single 24h           | 12        | 490         | -2.7        | -3.9        | -1.5        | 0%         | 0.733        |
|                                      | <b>Not reported</b>  | <b>2</b>  | <b>1069</b> | <b>-1.1</b> | <b>-3.5</b> | <b>1.3</b>  | <b>54%</b> | <b>0.142</b> |
| <b>Year of publication</b>           | Before 1995          | 20        | 1518        | -1.5        | -2.6        | -0.4        | 57%        | 0.001        |
|                                      | After 1995           | 15        | 1889        | -2.6        | -3.8        | -1.4        | 65%        | 0            |
| <b>Funding</b>                       | Public               | 13        | 2613        | -2.4        | -3.5        | -1.4        | 73%        | 0            |
|                                      | Profit               | 3         | 104         | -3.4        | -6.2        | -0.5        | 0%         | 0.808        |
|                                      | Non-profit           | 7         | 221         | -0.5        | -1.9        | 0.9         | 0%         | 0.464        |
|                                      | Mixed                | 2         | 101         | -0.9        | -2.7        | 1.0         | 57%        | 0.03         |
|                                      | <b>Not reported</b>  | <b>10</b> | <b>368</b>  | <b>-2.4</b> | <b>-4.3</b> | <b>-0.5</b> | <b>11%</b> | <b>0.344</b> |

## Appendix E - Dose-response models: diagnostics and fitting

**Figure 7:** Quantiles of Pearson standardised residuals for mean SBP (first plot) and DBP (second plot) are plotted against quantiles of the normal distribution to assess potential outliers and goodness-of-fit.

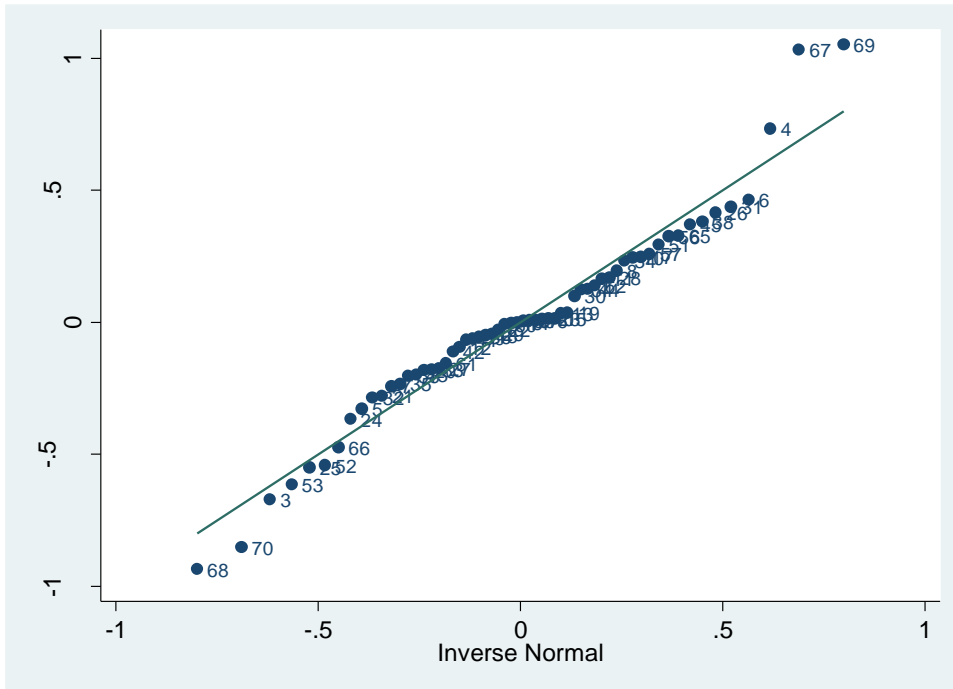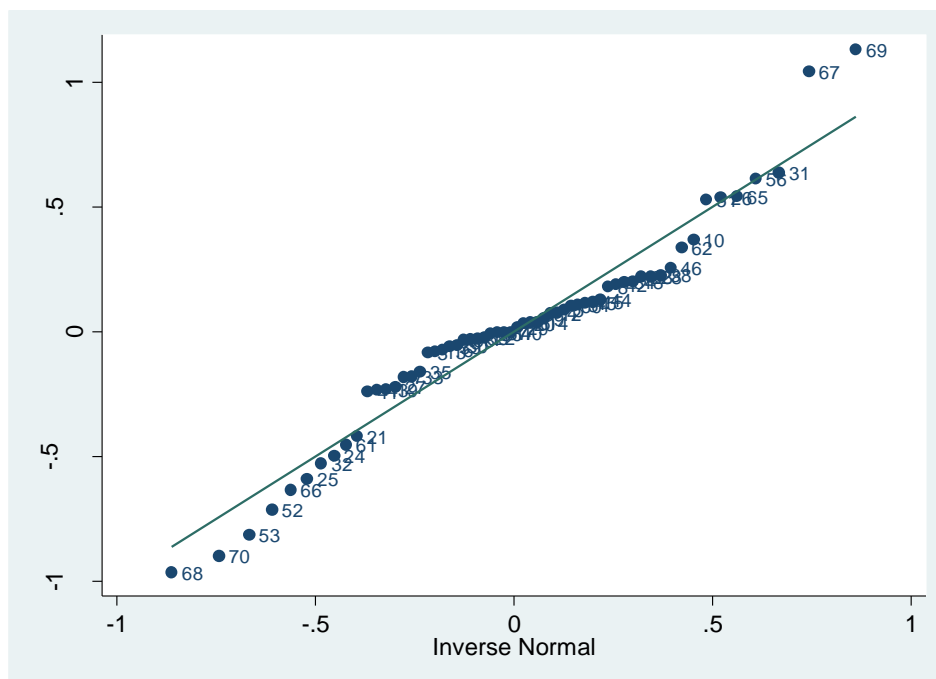

**Table 5:** Regression coefficients of model covariates from nested meta-regression models on mean SBP (first column: null model; second column: mean UNa excretion; last column: fully adjusted model); related  $\tau^2$ , adjusted  $R^2$  and residual  $I^2$  value changes are reported at the bottom.

| Covariates                             | Categories               | Null Model           | Model 1              | Model 2              | Model 3              | Model 4              | Model 5              | Model 6               |
|----------------------------------------|--------------------------|----------------------|----------------------|----------------------|----------------------|----------------------|----------------------|-----------------------|
| <b>Mean UNa excretion - 100 mmol/d</b> |                          |                      | 5.224 <sup>***</sup> | 5.199 <sup>***</sup> | 5.159 <sup>***</sup> | 5.188 <sup>***</sup> | 5.247 <sup>***</sup> | 5.284 <sup>***</sup>  |
| <b>Age at baseline</b>                 | Age < 40 yrs old*        |                      |                      | 0                    | 0                    | 0                    | 0                    | 0                     |
|                                        | Age 40-49 yrs old        |                      |                      | 17.62                | 11.43 <sup>*</sup>   | 12.89 <sup>*</sup>   | 15.20 <sup>**</sup>  | 18.24 <sup>***</sup>  |
|                                        | Age 50-59 yrs old        |                      |                      | 22.39 <sup>*</sup>   | 9.252                | 8.913                | 13.56 <sup>*</sup>   | 11.55 <sup>*</sup>    |
|                                        | Age $\geq$ 60 yrs old    |                      |                      | 20.44 <sup>*</sup>   | 14.11 <sup>*</sup>   | 15.93 <sup>**</sup>  | 16.12 <sup>**</sup>  | 12.44 <sup>**</sup>   |
| <b>BP status</b>                       | Normotensive*            |                      |                      |                      | 0                    | 0                    | 0                    | 0                     |
|                                        | Hypertensive             |                      |                      |                      | 24.99 <sup>***</sup> | 26.80 <sup>***</sup> | 21.72 <sup>***</sup> | 11.35 <sup>*</sup>    |
| <b>Mean UNa excretion at baseline</b>  | <100 mmol/d*             |                      |                      |                      |                      | 0                    | 0                    | 0                     |
|                                        | 100-149 mmol/d           |                      |                      |                      |                      | 10.06                | 12.93 <sup>*</sup>   | 25.16 <sup>***</sup>  |
|                                        | $\geq$ 150 mmol/d        |                      |                      |                      |                      | 8.601                | 9.36                 | 18.69 <sup>**</sup>   |
|                                        | Not reported             |                      |                      |                      |                      | 7.845                | 7.555                | 13.38 <sup>*</sup>    |
| <b>BP measure method</b>               | Point office, supine*    |                      |                      |                      |                      |                      | 0                    | 0                     |
|                                        | Point office, sitting    |                      |                      |                      |                      |                      | -8.419 <sup>*</sup>  | -13.23 <sup>***</sup> |
| <b>Specific trial design</b>           | No Run-in*               |                      |                      |                      |                      |                      |                      | 0                     |
|                                        | Run-in, Normal Diet      |                      |                      |                      |                      |                      |                      | 11.93 <sup>***</sup>  |
|                                        | Run-in, Low Na Diet      |                      |                      |                      |                      |                      |                      | 19.73 <sup>***</sup>  |
|                                        | Constant                 | 136.6 <sup>***</sup> | 132.7 <sup>***</sup> | 115.3 <sup>***</sup> | 109.0 <sup>***</sup> | 99.30 <sup>***</sup> | 103.4 <sup>***</sup> | 95.50 <sup>***</sup>  |
|                                        | <b>Tau<sup>2</sup></b>   | 275                  | 268                  | 216                  | 76                   | 70                   | 59                   | 33                    |
|                                        | <b>Adj R<sup>2</sup></b> | 0                    | 3%                   | 22%                  | 72%                  | 75%                  | 79%                  | 88%                   |
|                                        | <b>Res I<sup>2</sup></b> | 99%                  | 99%                  | 98%                  | 94%                  | 94%                  | 94%                  | 90%                   |

\*  $p < 0.5$ ; \*\*  $p < 0.01$ ; \*\*\*  $p < 0.001$

**Figure 8:** Mean SBP and DBP responses against mean urinary sodium excretion - Each line represents a trial, where low sodium (1) and high sodium (2) arms are connected (SBP: first plot; DBP: second plot).

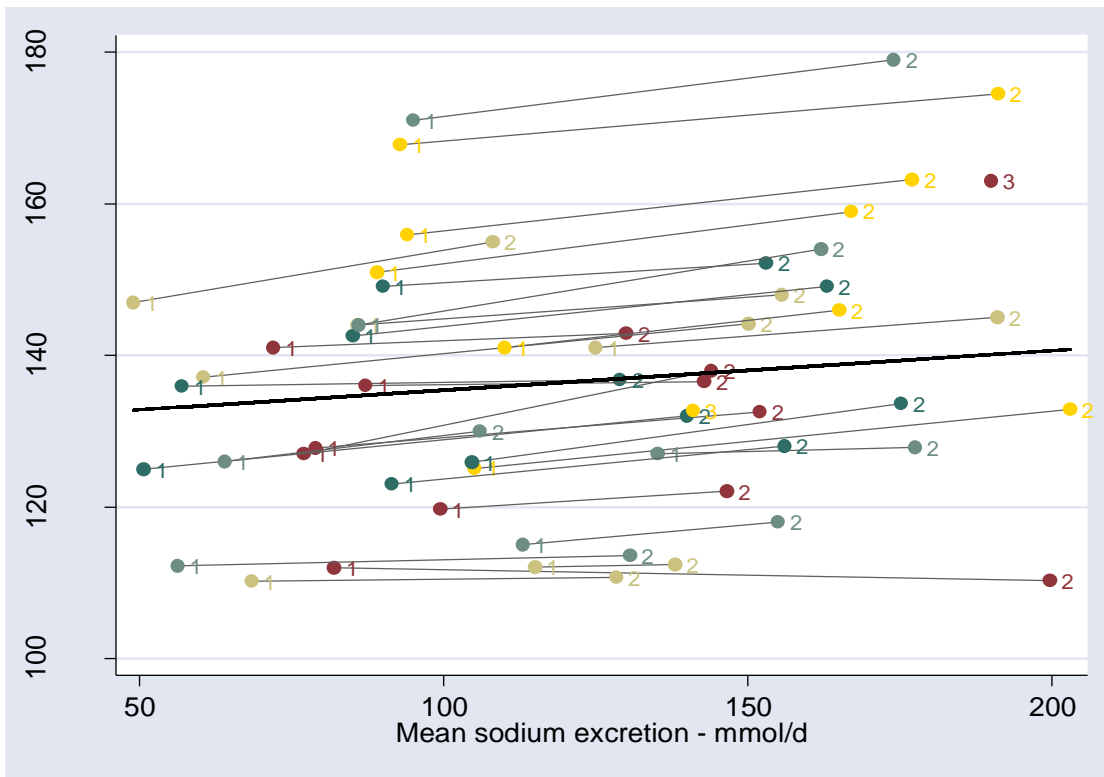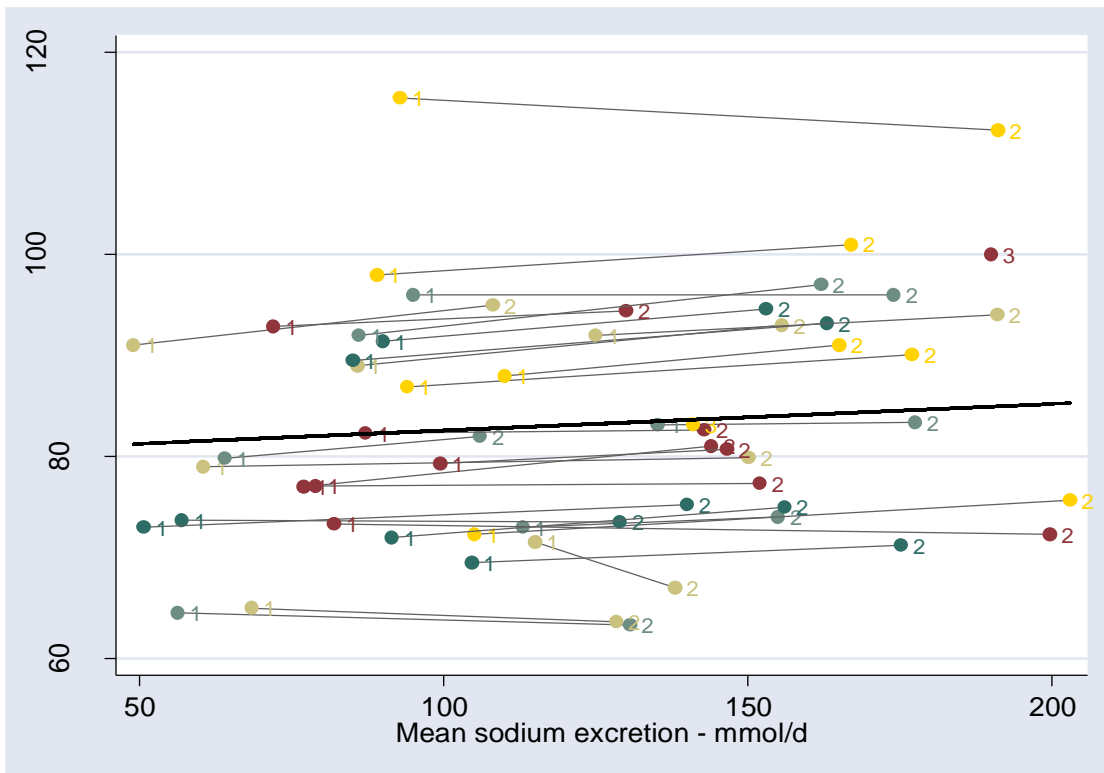

## Appendix F - Sensitivity analyses

**Figure 9:** Forest plot of the effect of salt reduction on SBP difference in means (study level) by type of intervention. Sensitivity analysis on the impact of van Berge-Landry's estimate on SBP difference in means in the Counselling group.

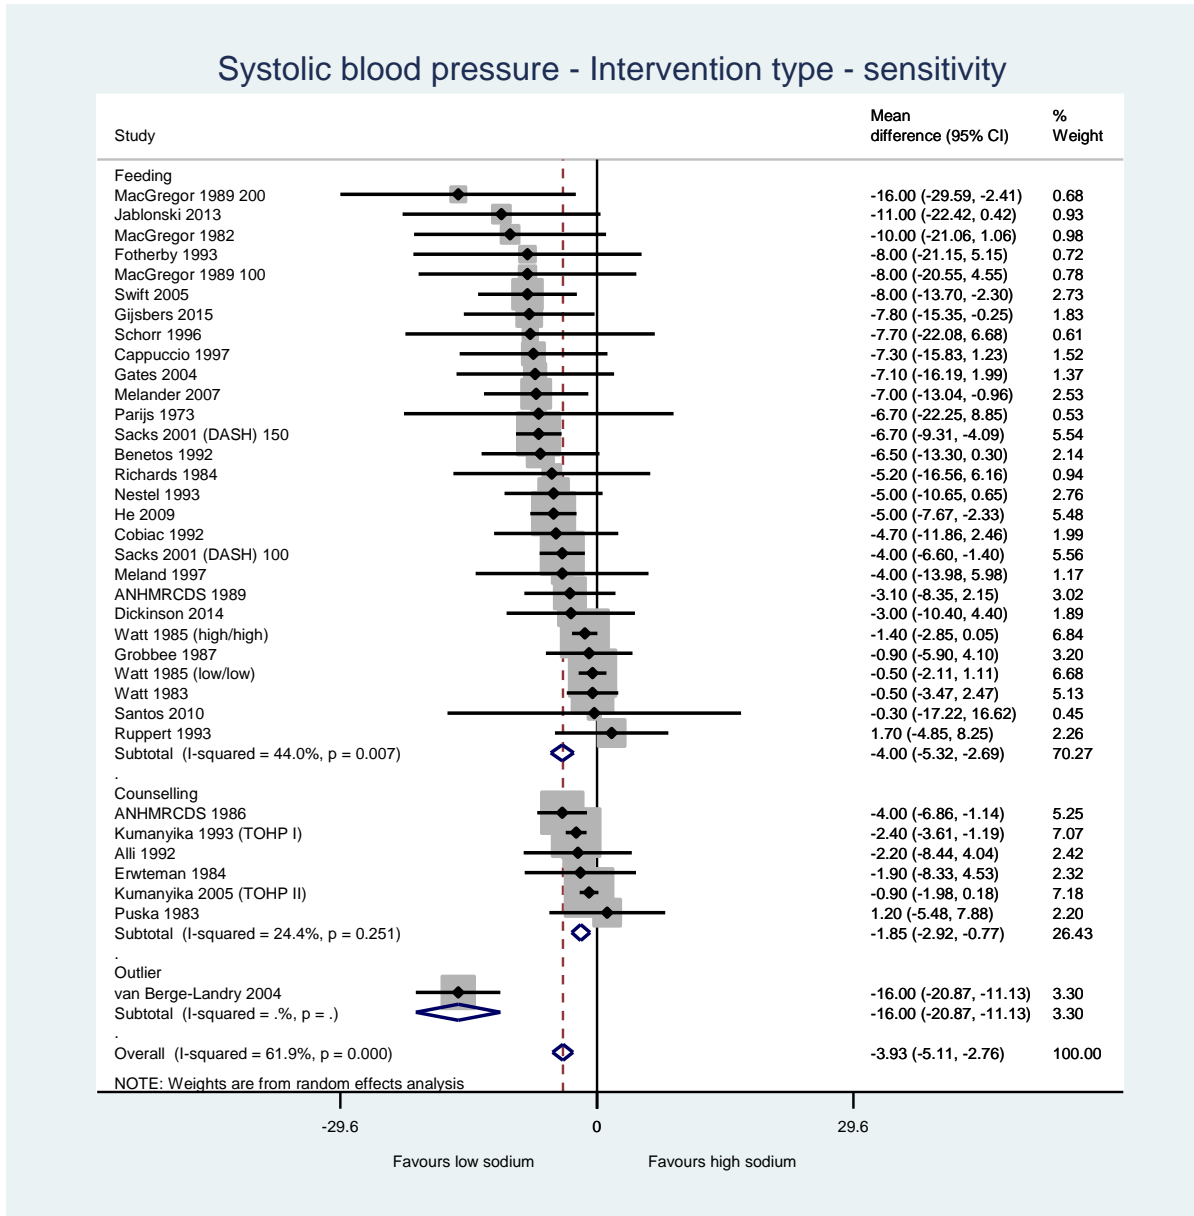



**Figure 10:** Linear dose-response relationship between mean urinary sodium excretion and mean systolic blood pressure from meta-regression modelling of trials' arms (crude model) **with inclusion of van Berge-Landry's arms**. Circles represents mean SBP by arm and their size is proportional to weights from the mixed-effects model. The slope from the full model with moderators did not differ substantially (UNa unadjusted coefficient: 5.4 mm Hg, 95% CI: 4.1-6.6).

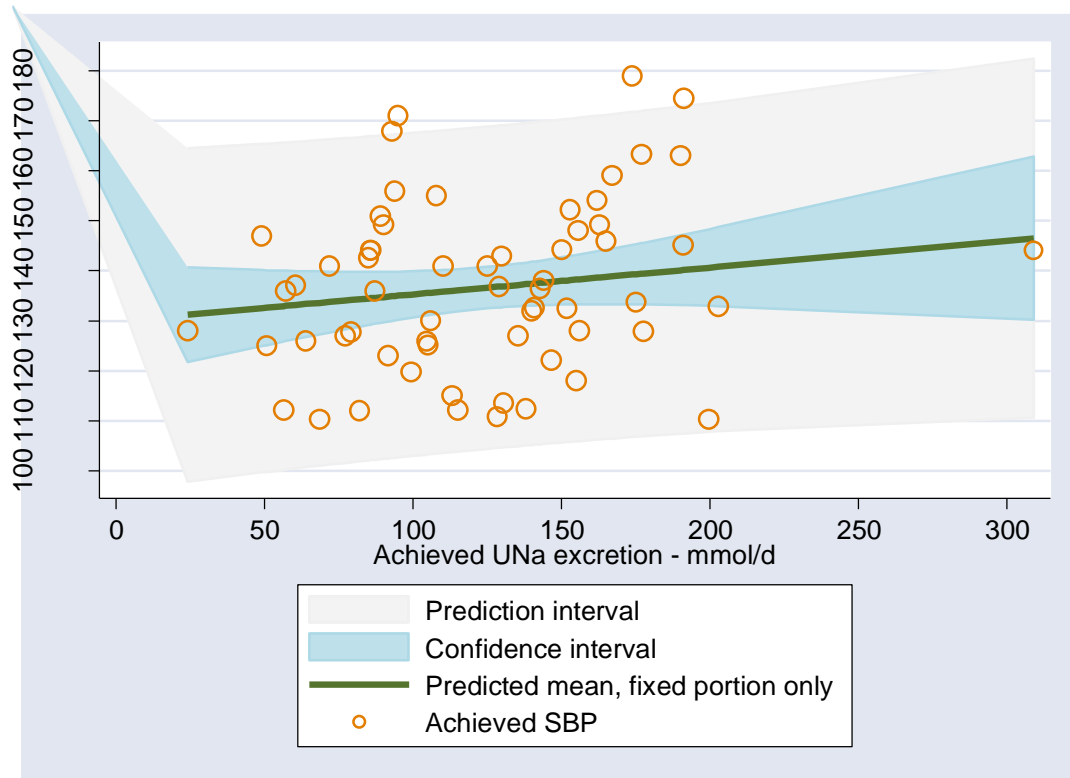

## Appendix G - Funnel plots

**Figure 11:** Contour funnel plot of mean SBP difference effect estimates against their standard error and with superimposed areas of statistical significance.

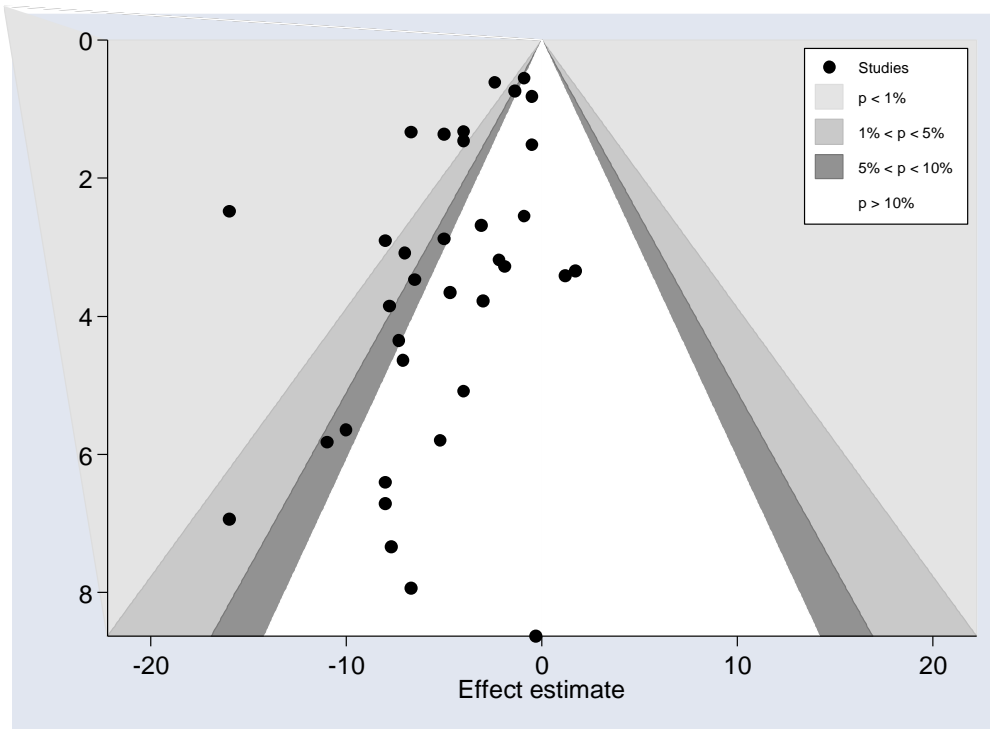

**Figure 12:** Funnel plot of mean SBP difference effect estimates against their standard error and with Egger regression line to test for plot asymmetry ( $p = 0.001$ ).

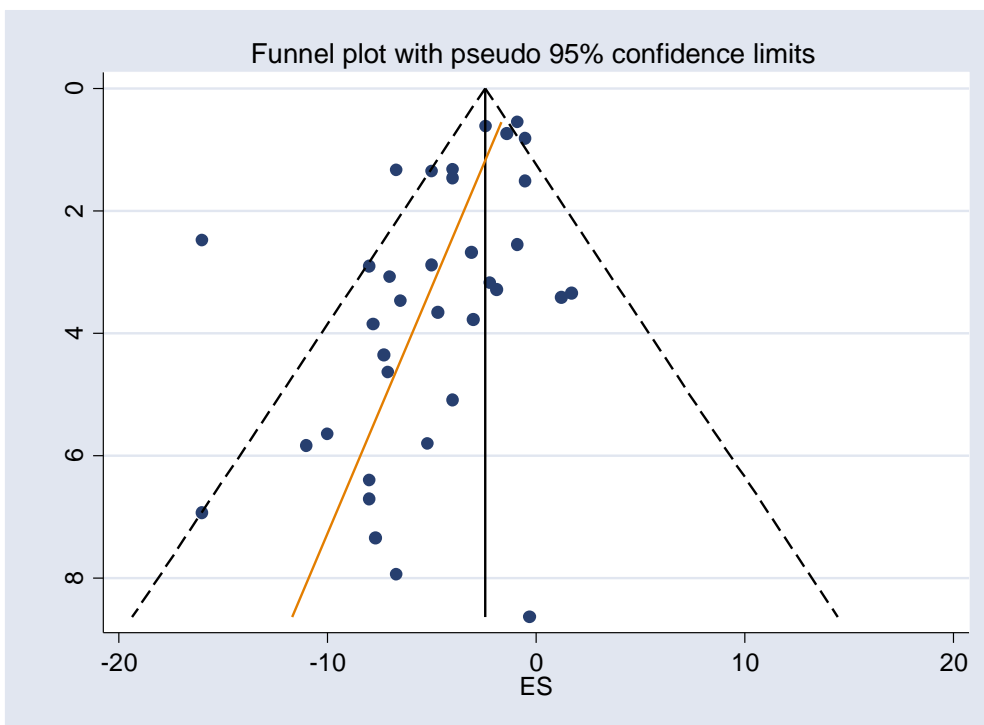

## Appendix H - Forest plots at study level: subgroup analyses

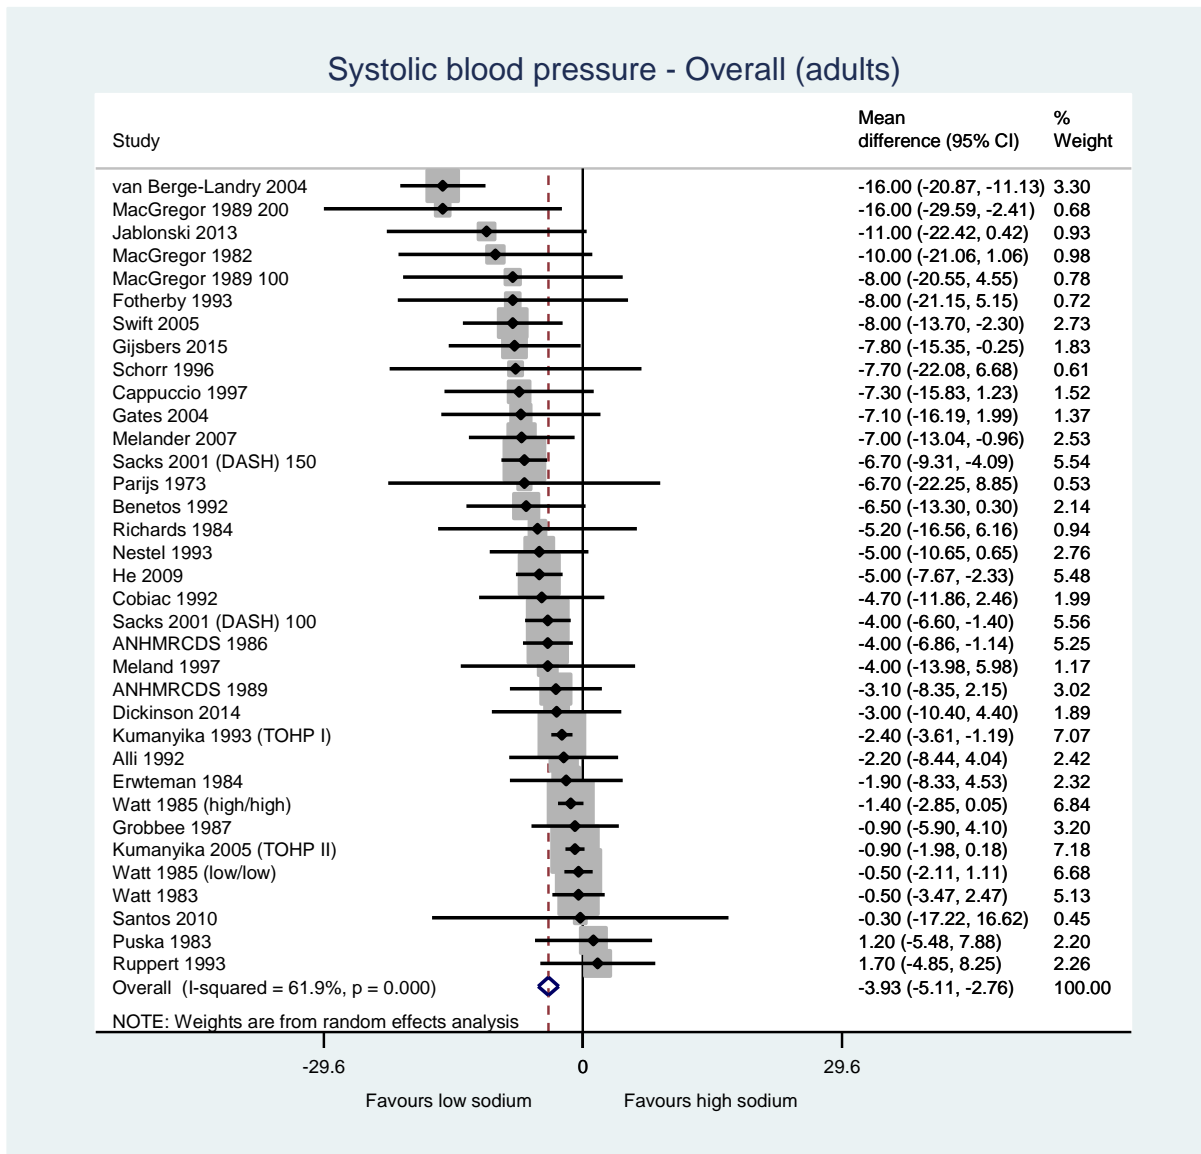

### Systolic blood pressure - Age < and >= 50 yrs old

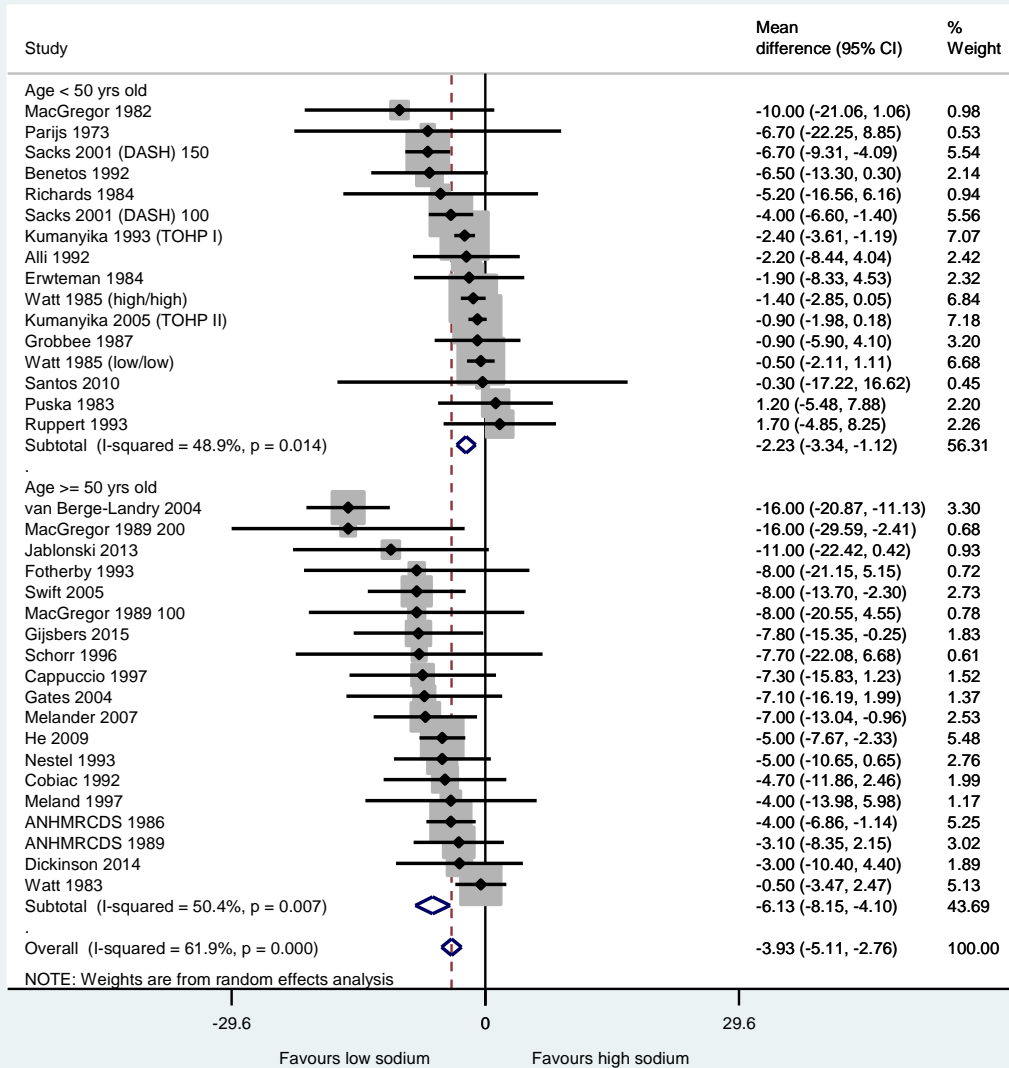

### Systolic blood pressure - Sex proportion

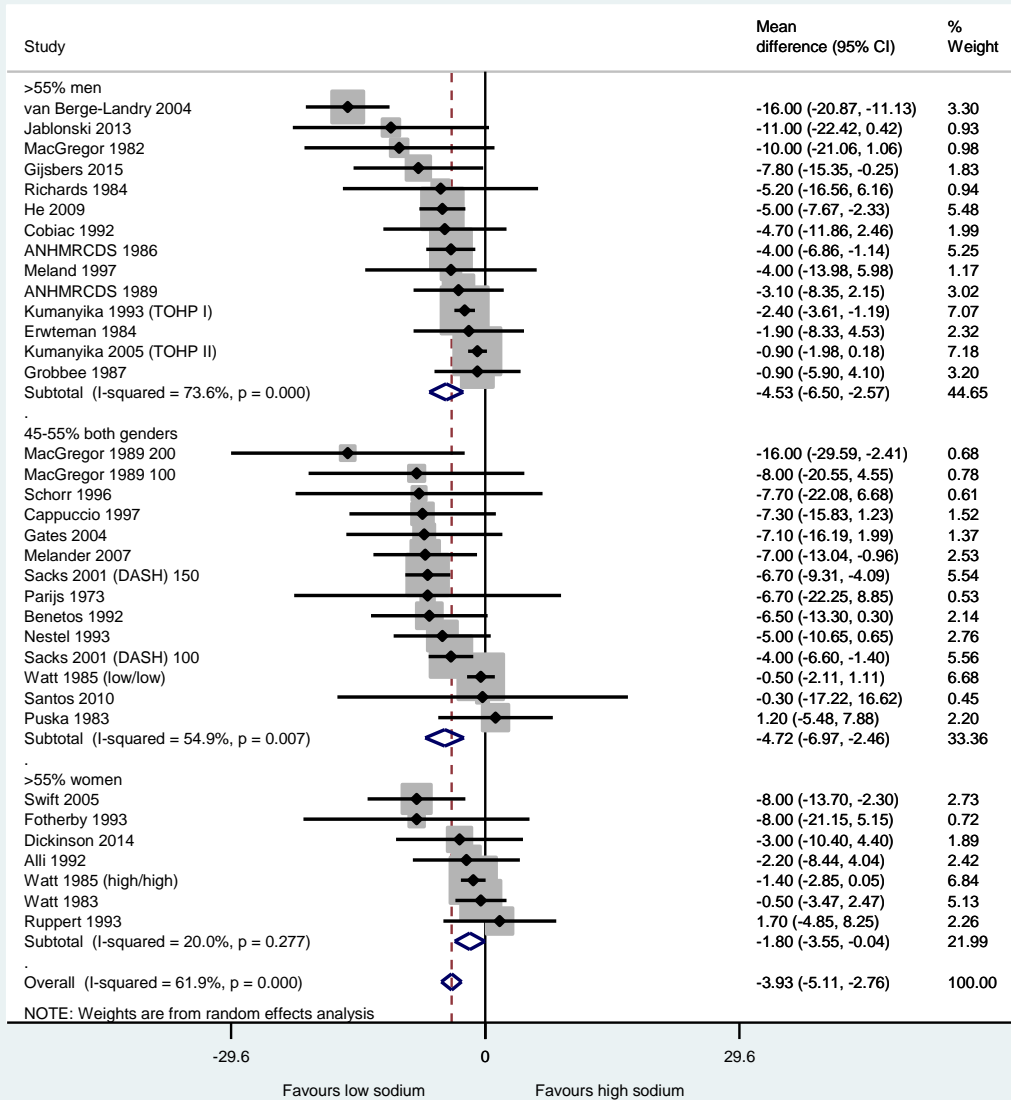

### Systolic blood pressure - Blood pressure status

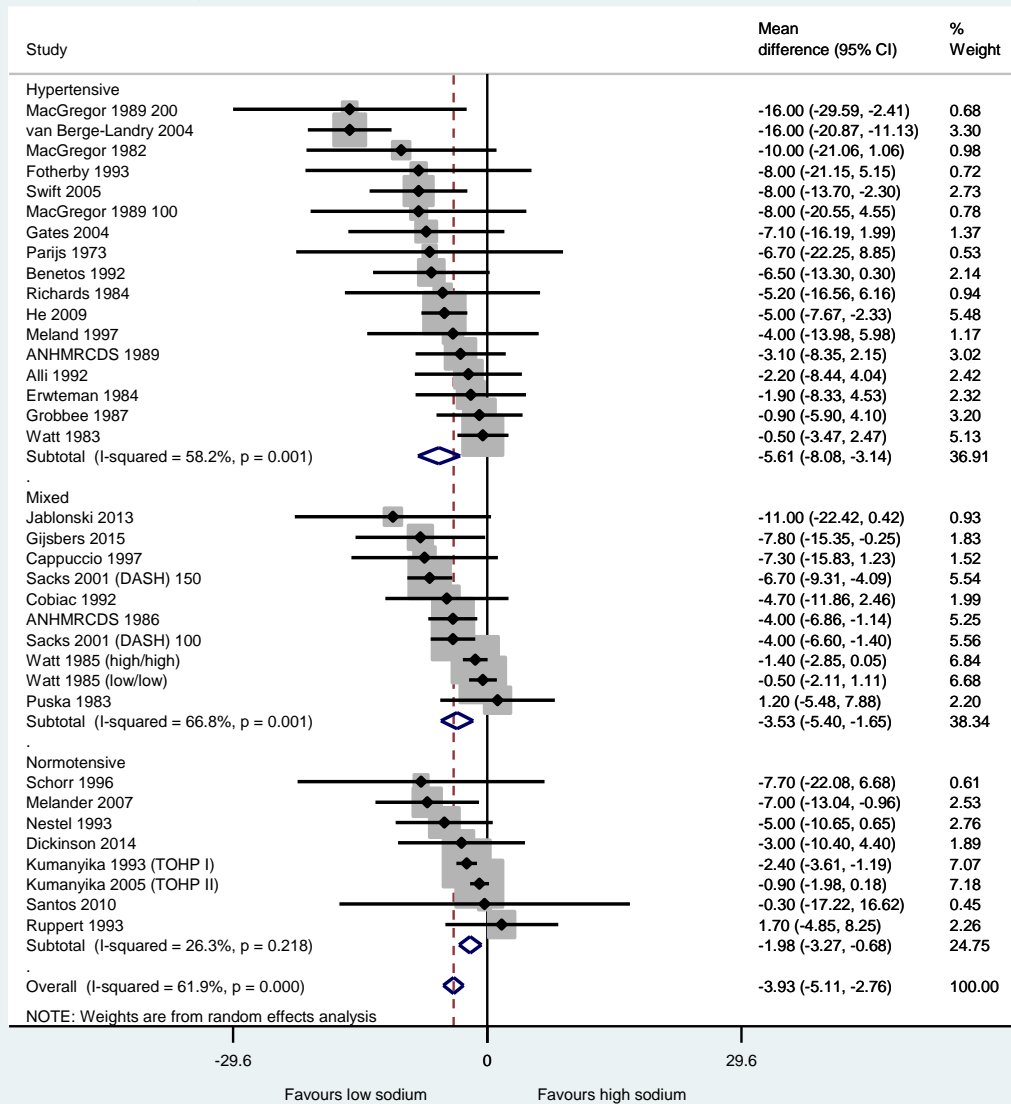

### Systolic blood pressure - Ethnicity

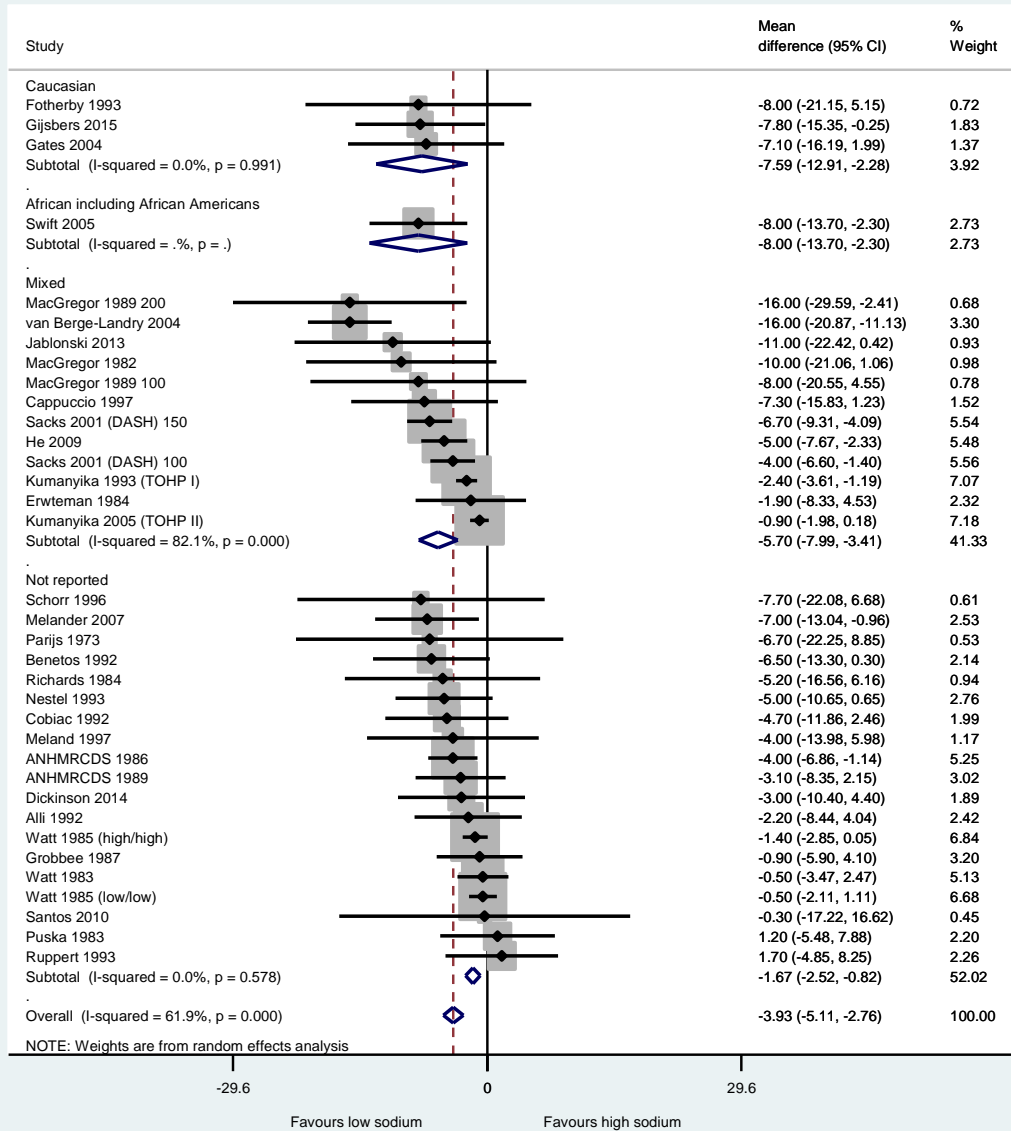

### Systolic blood pressure - BMI

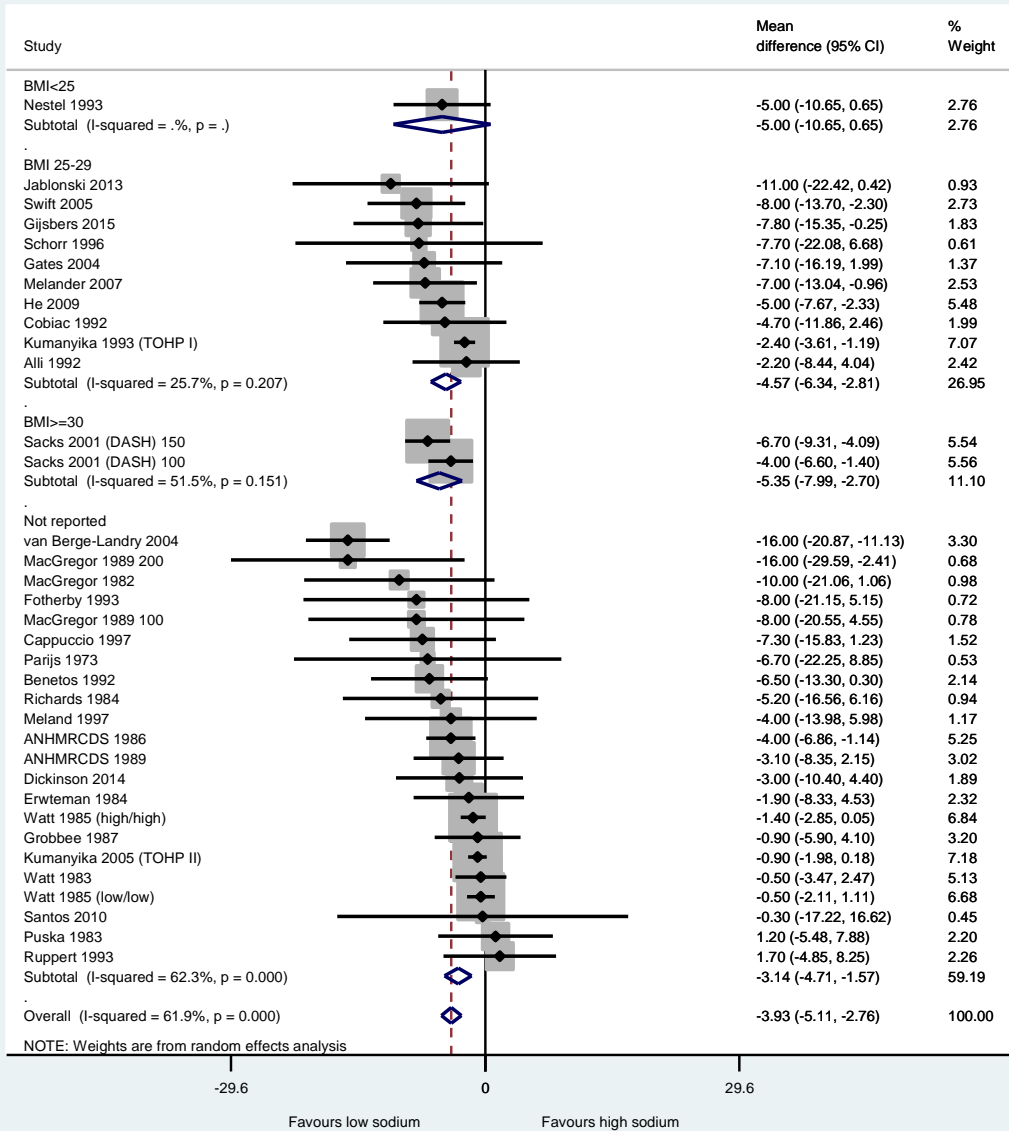



### Systolic blood pressure - Baseline SBP

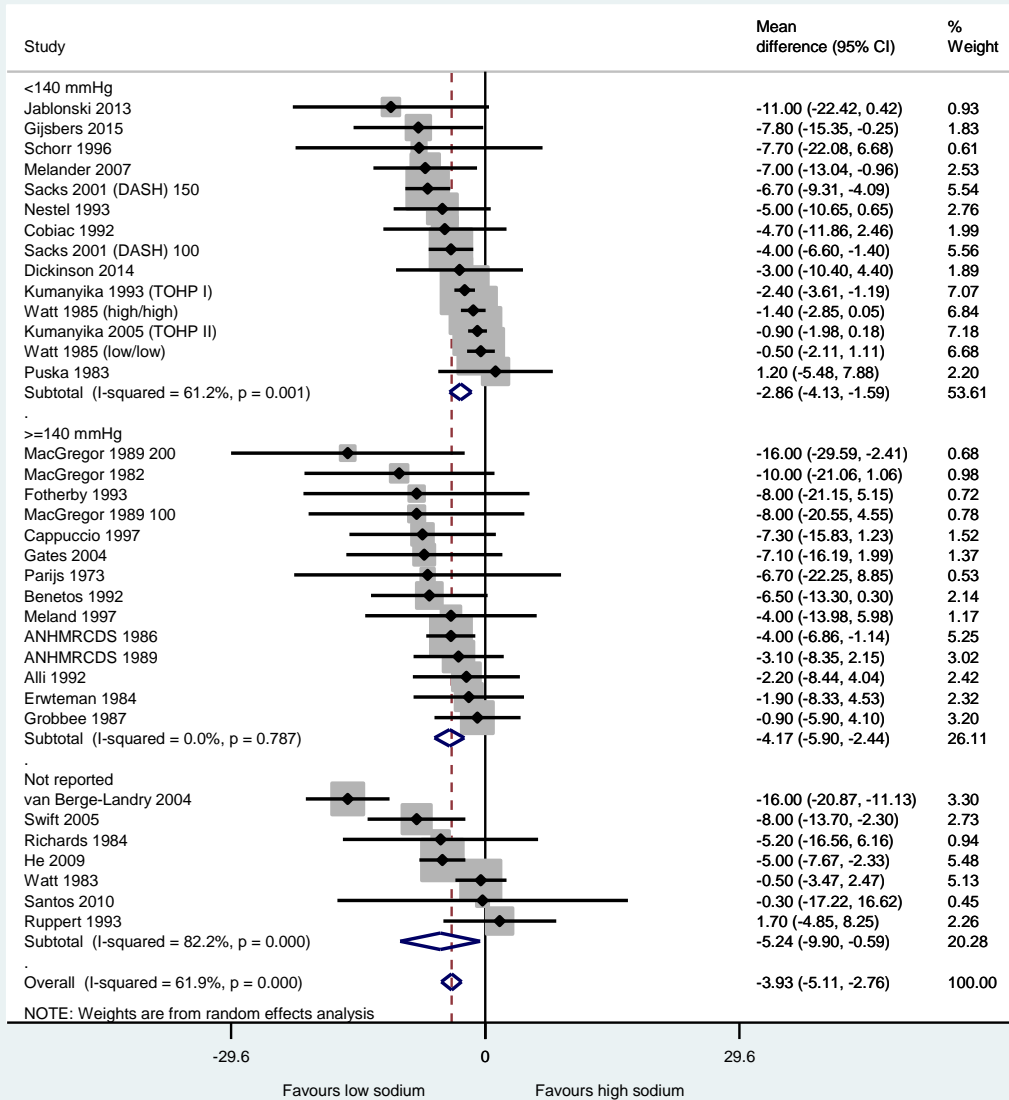

### Systolic blood pressure - Baseline potassium intake

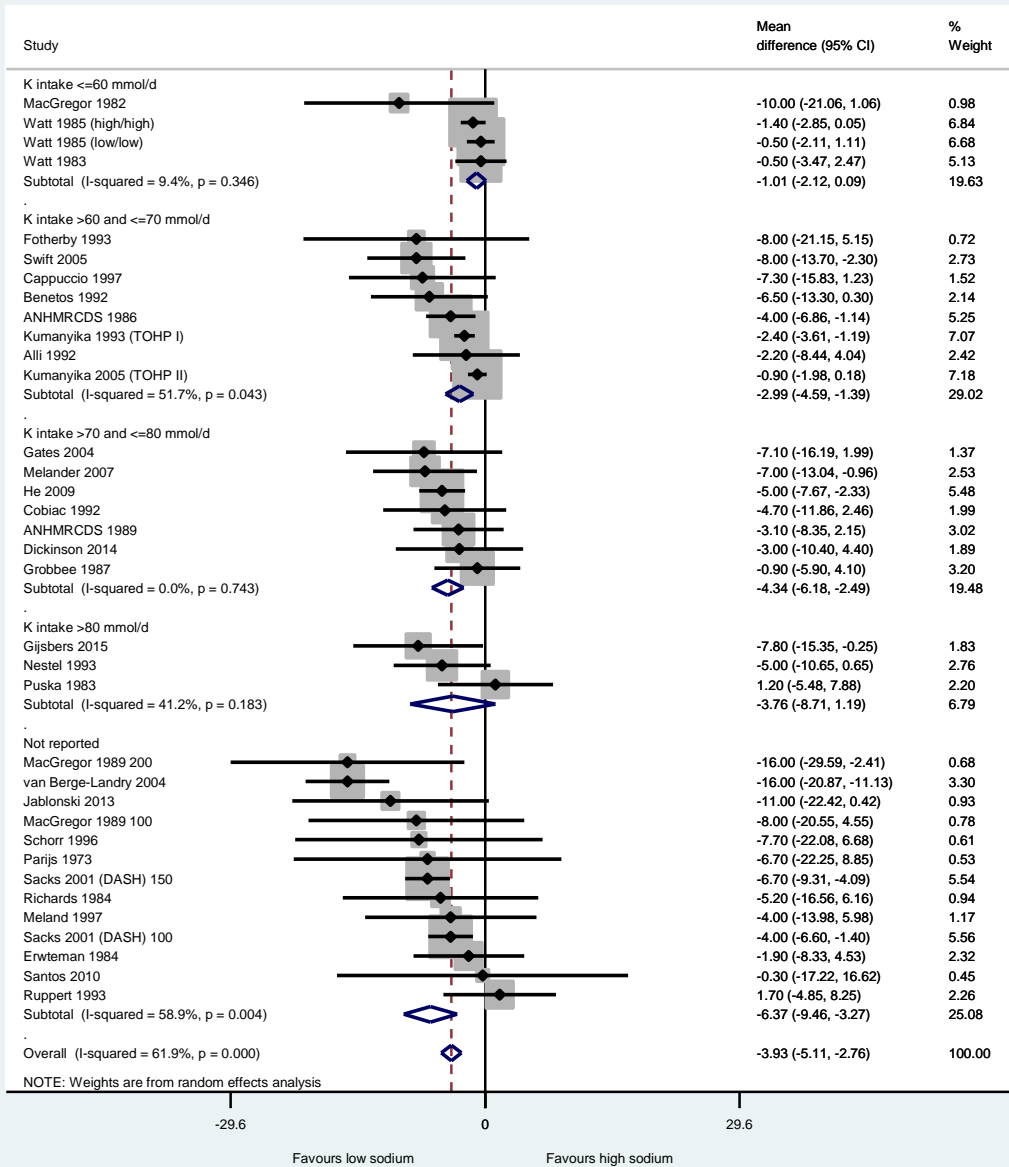

### Systolic blood pressure - Sodium excretion at baseline

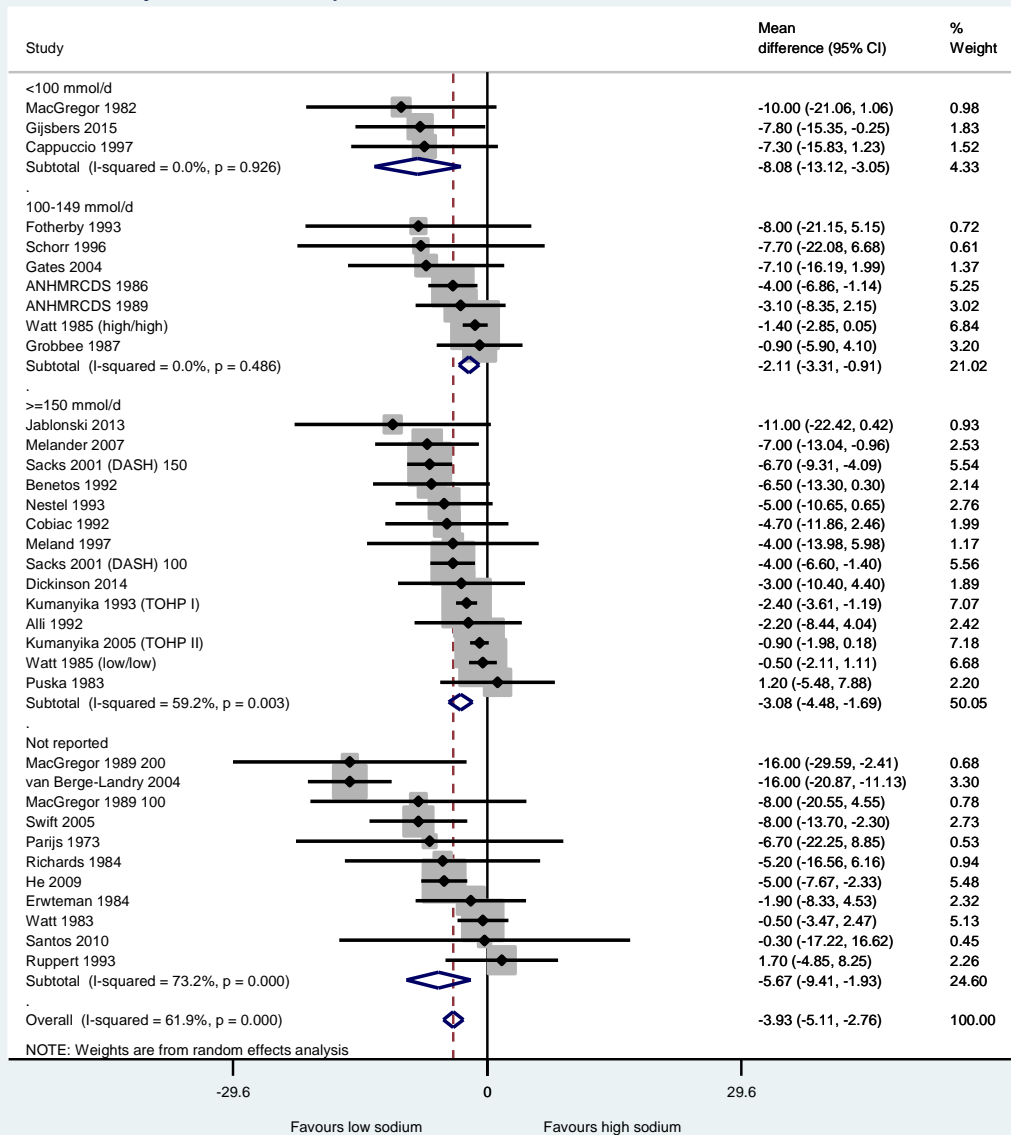

### Systolic blood pressure - Sodium excretion difference across arms

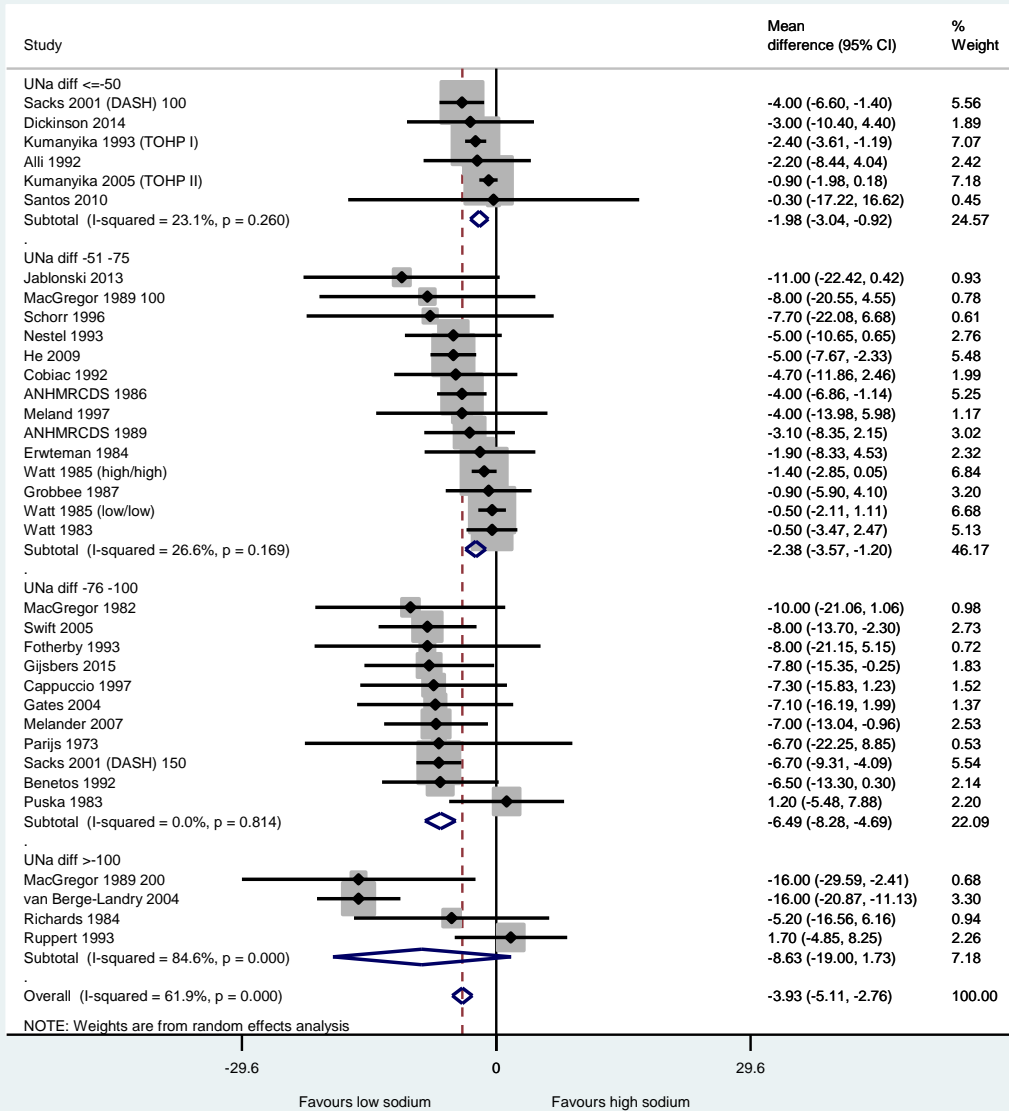

### Systolic blood pressure - Achieved sodium excretion in high Na group

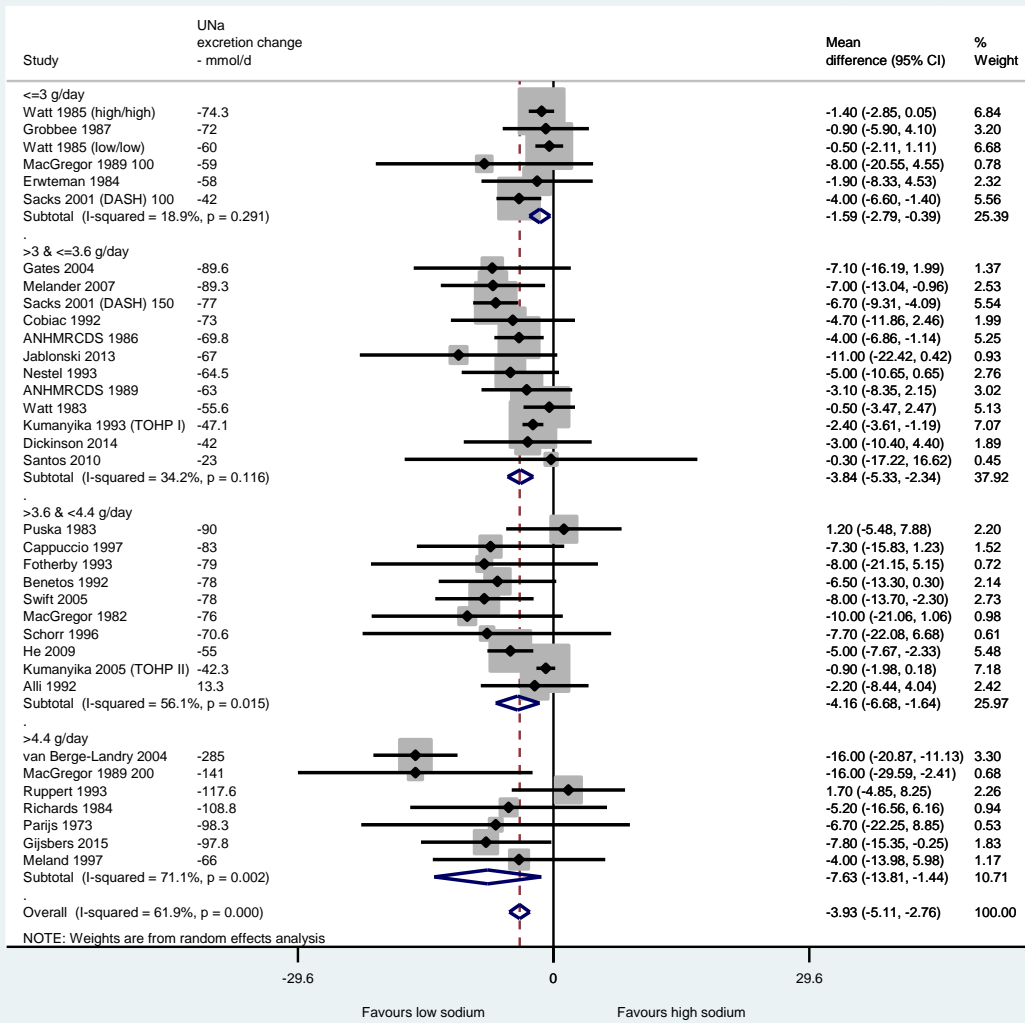

### Systolic blood pressure - Achieved sodium excretion in low Na group

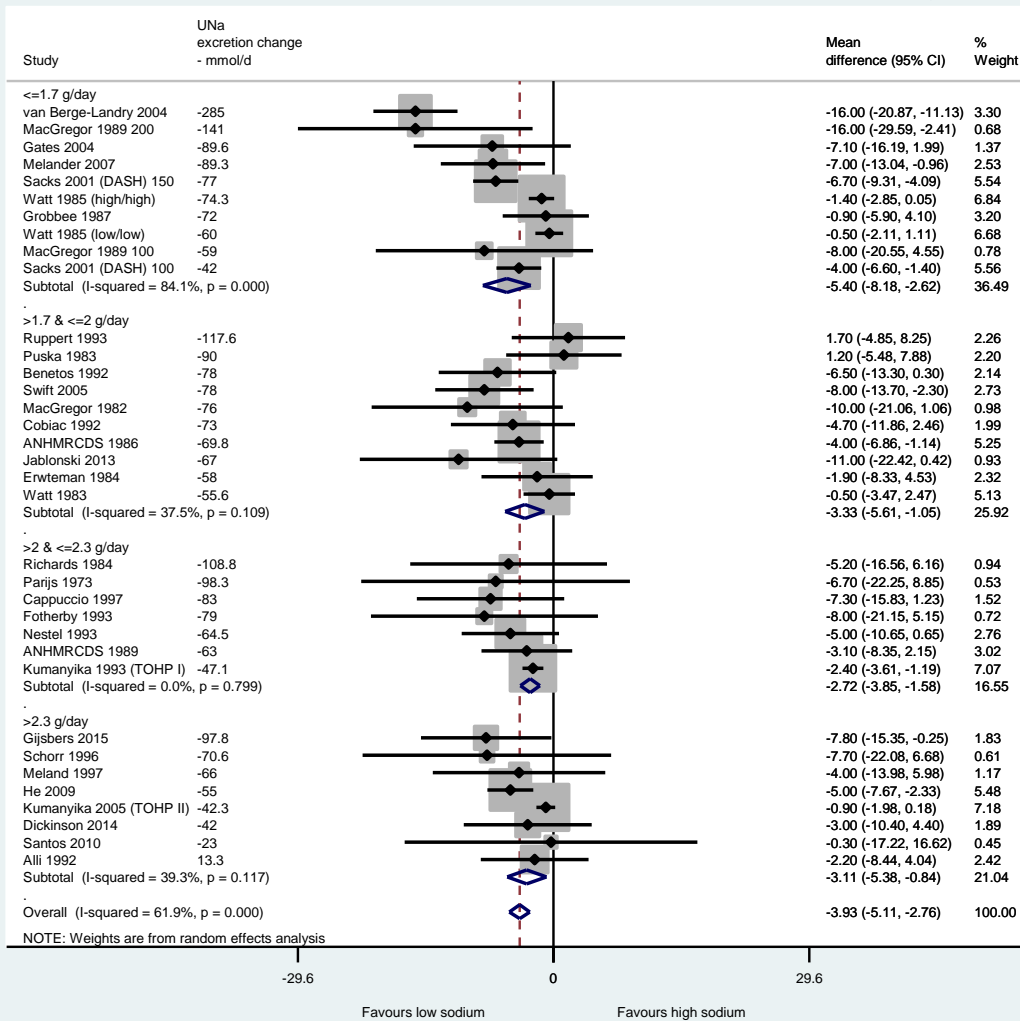

### Systolic blood pressure - Study design

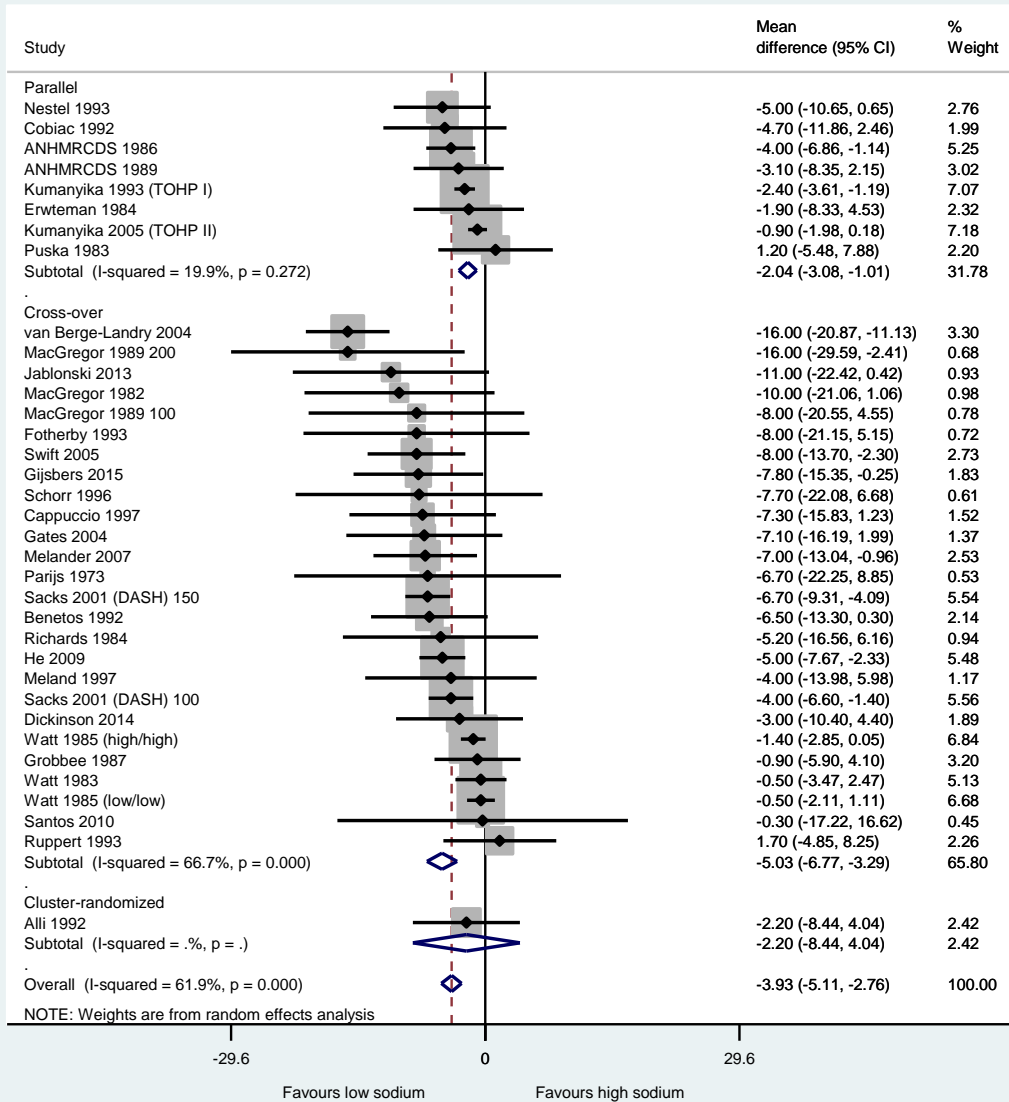

### Systolic blood pressure - Specific design

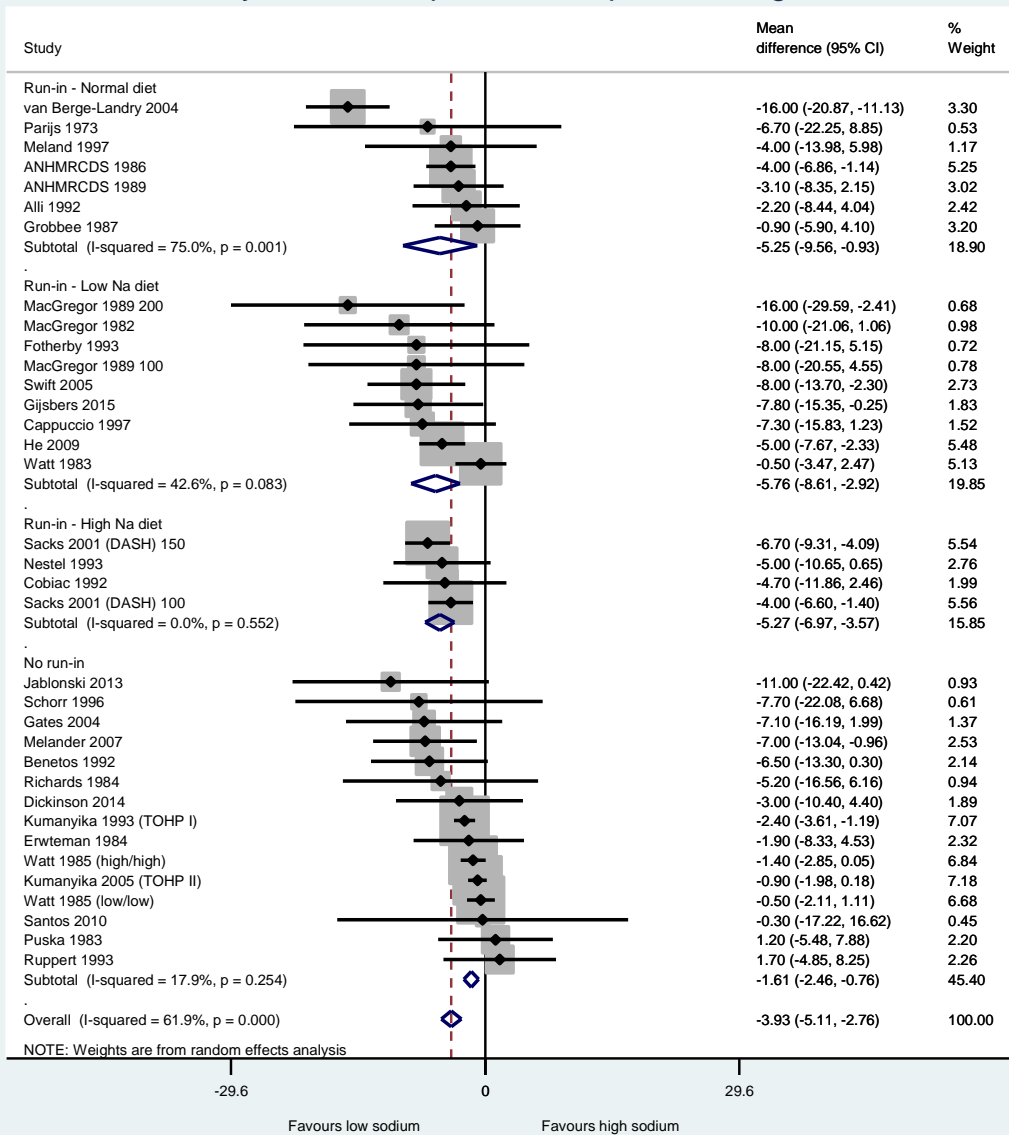



### Systolic blood pressure - Trial duration

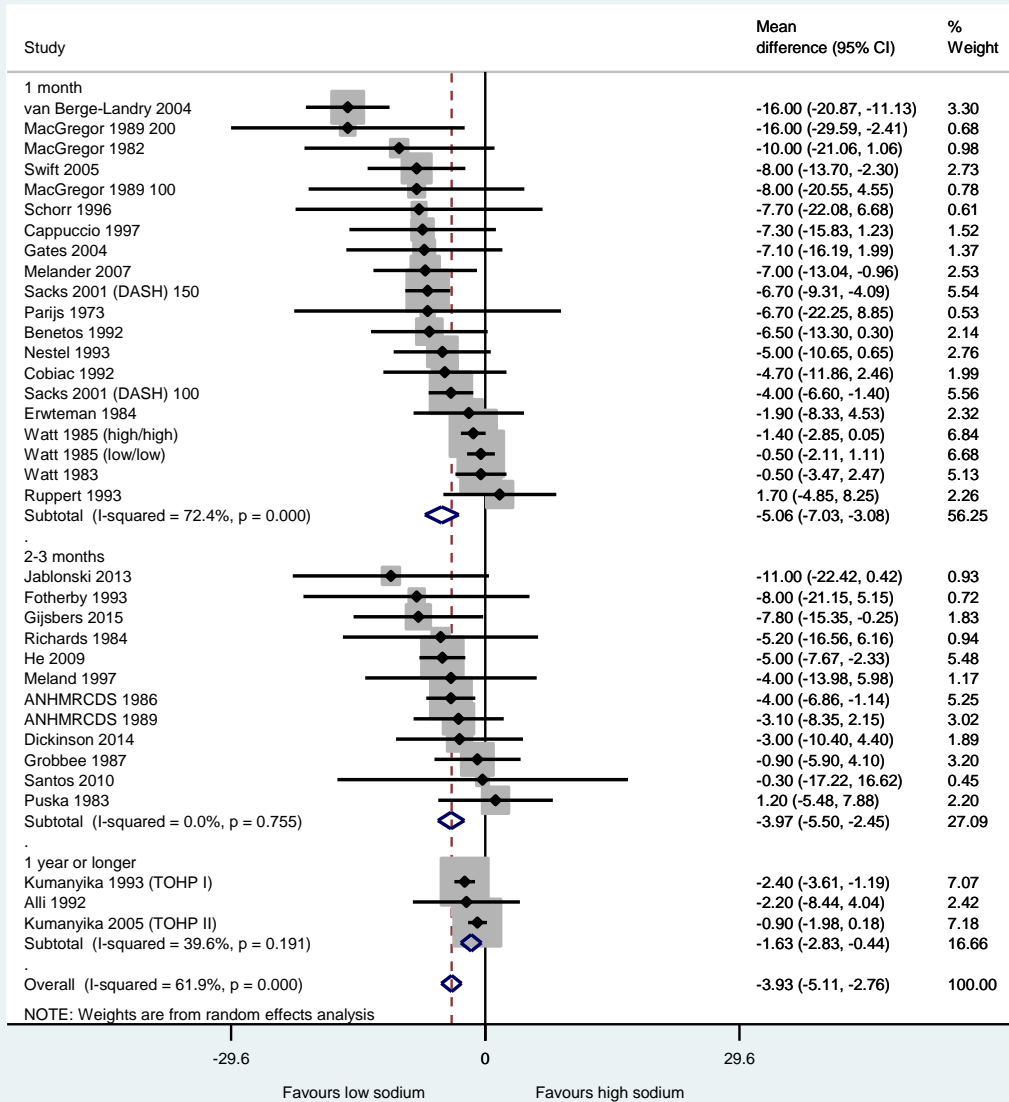

### Systolic blood pressure - Intervention type

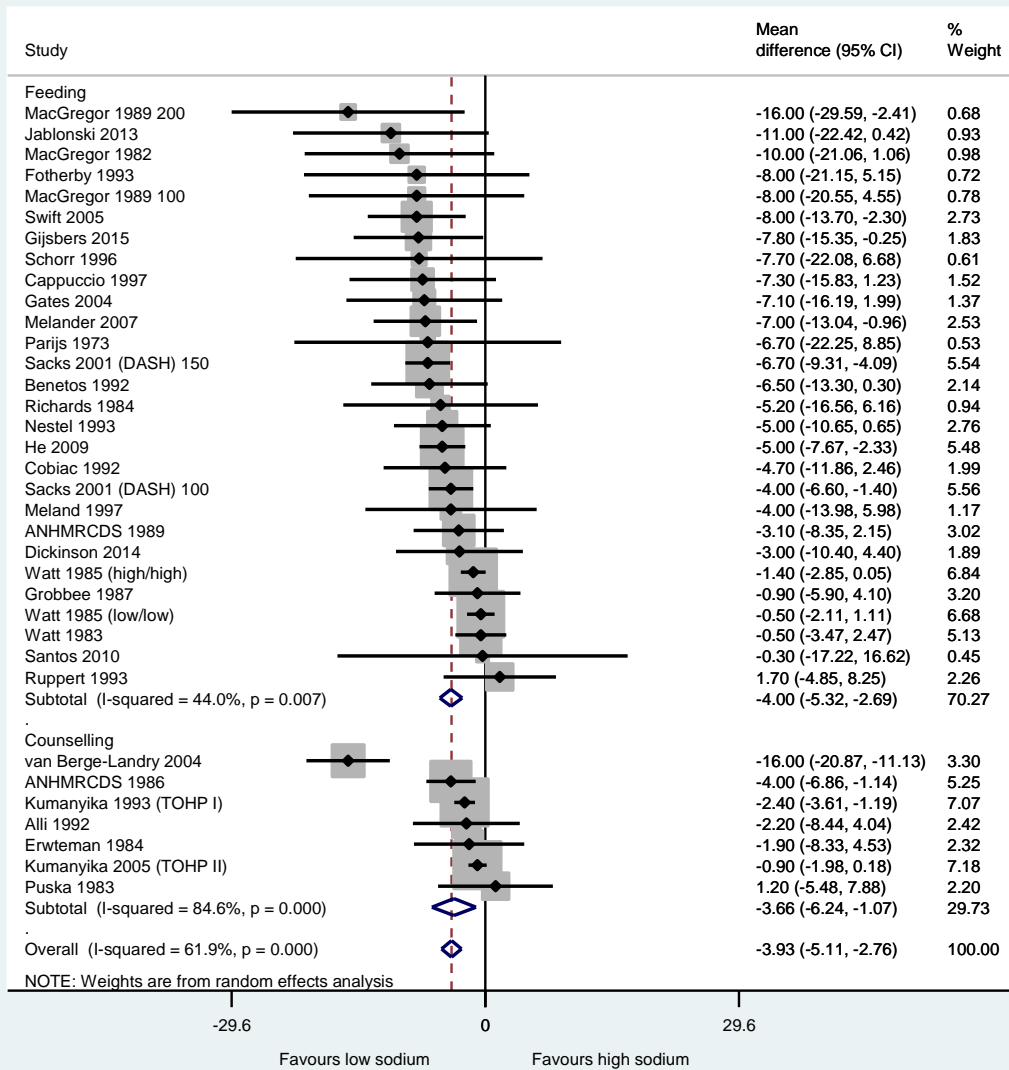

### Systolic blood pressure - BP measurement method

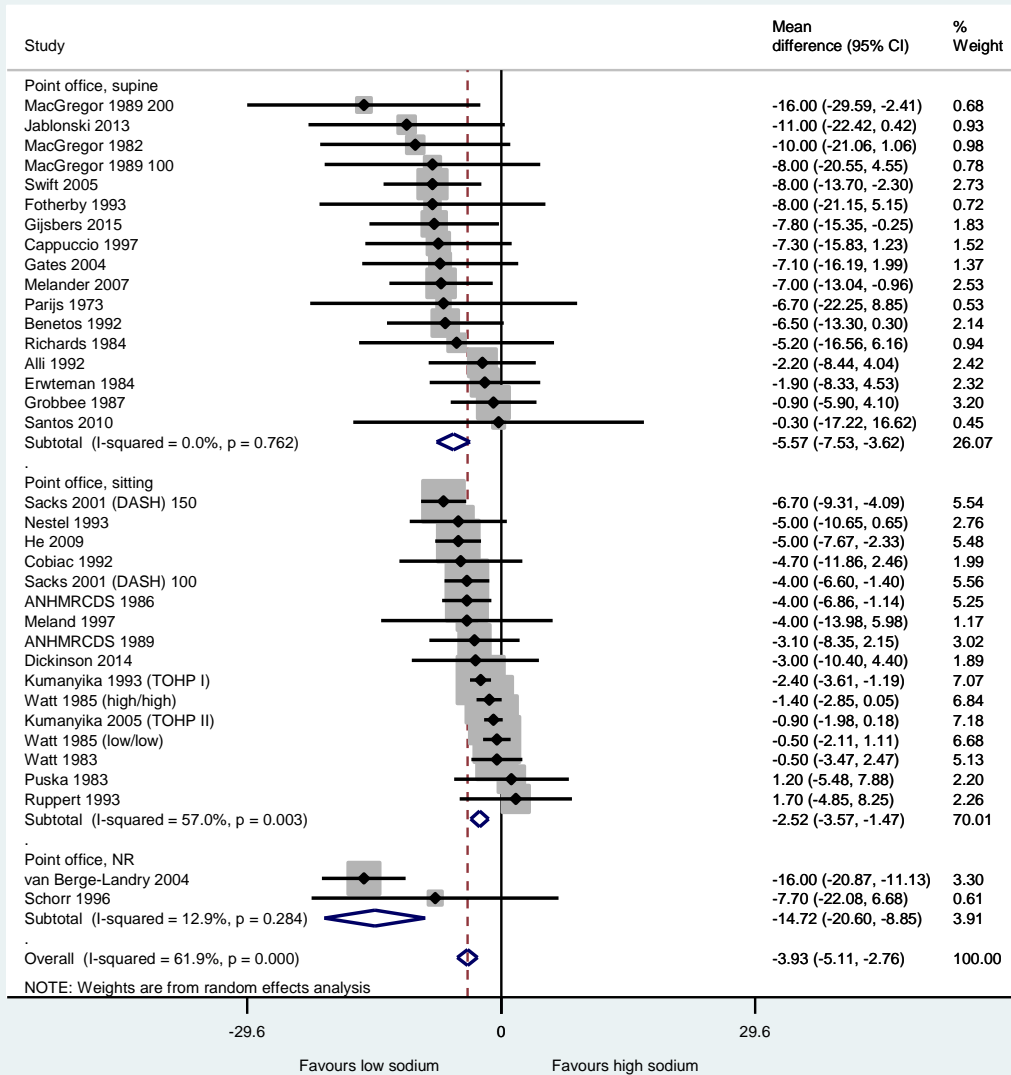

### Systolic blood pressure - Number of urinary collections

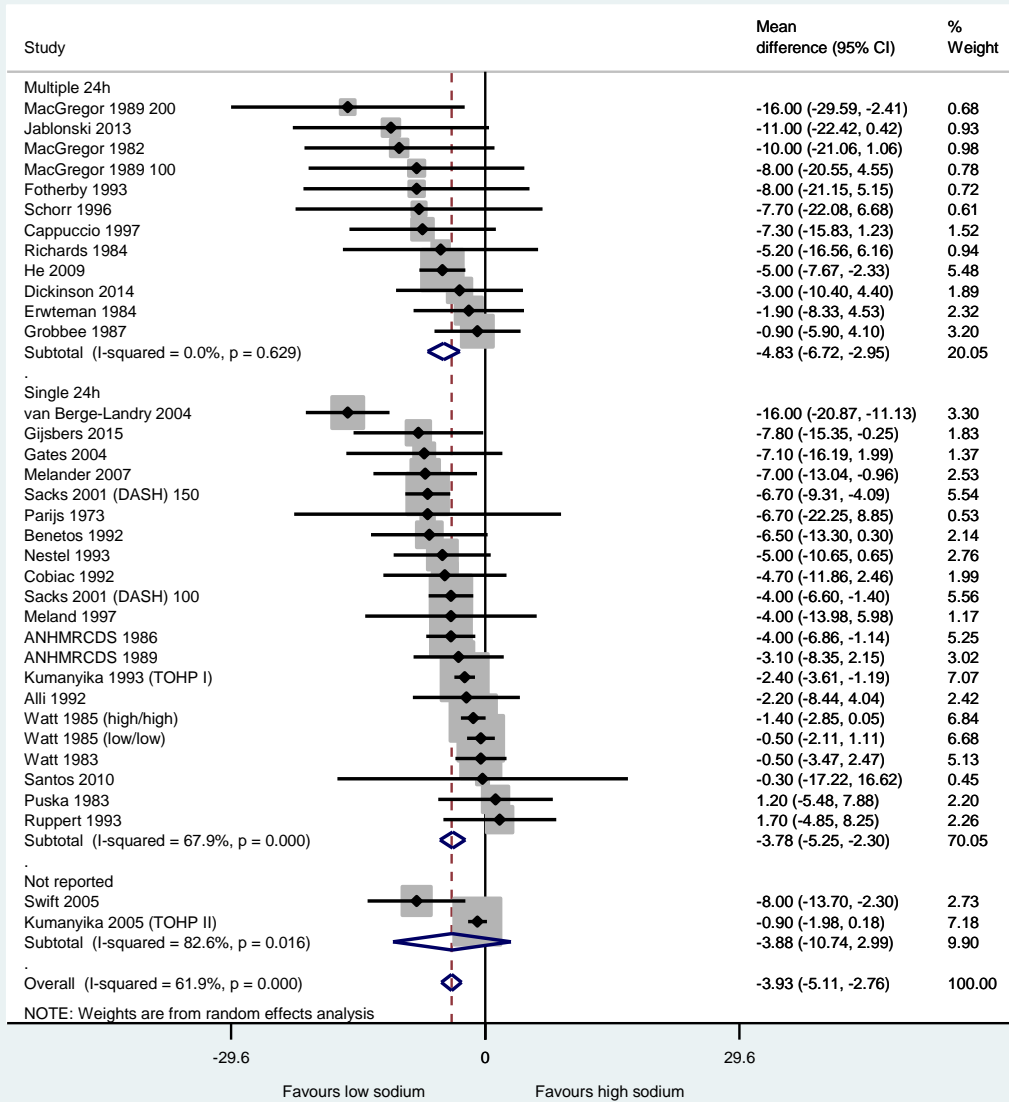

### Systolic blood pressure - Risk of Bias TIER

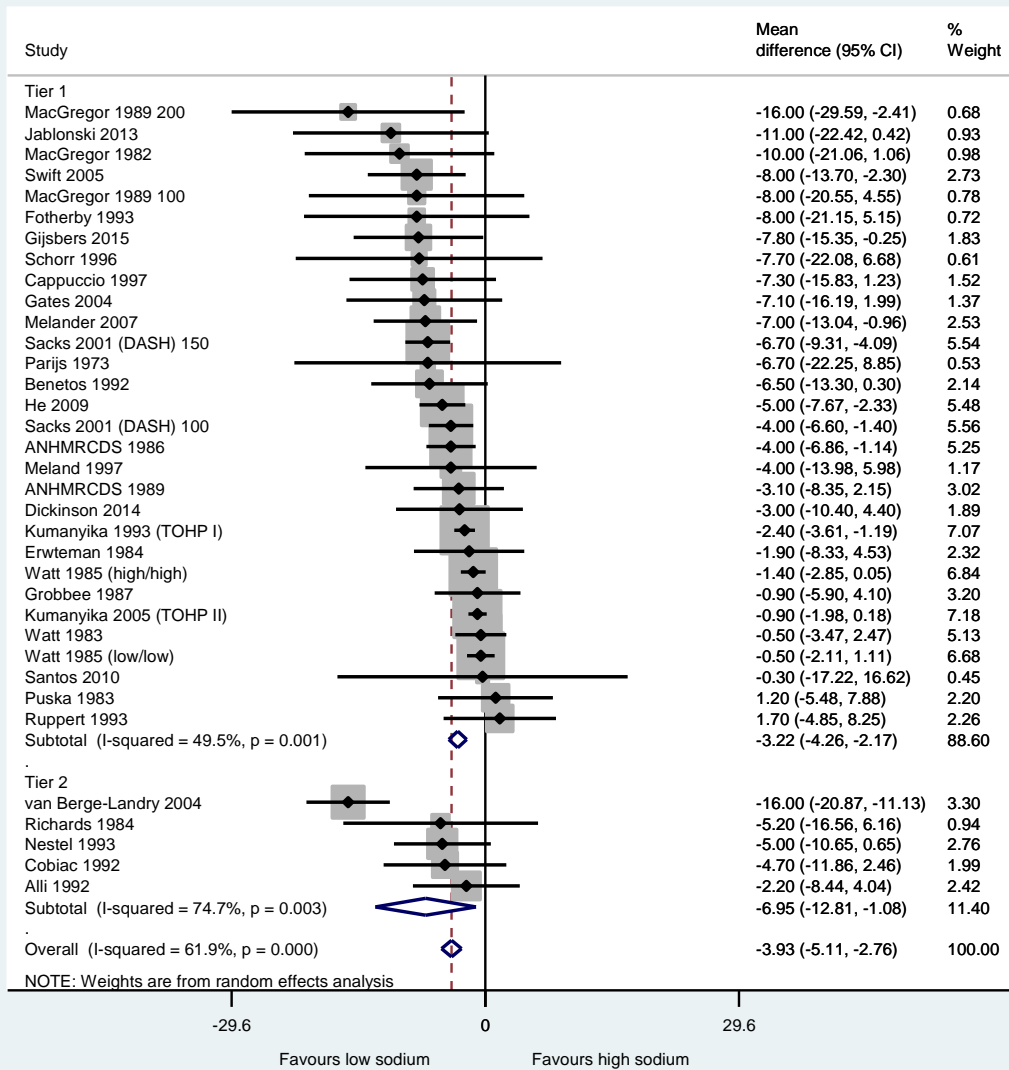

### Systolic blood pressure - Risk of Bias OUTCOME

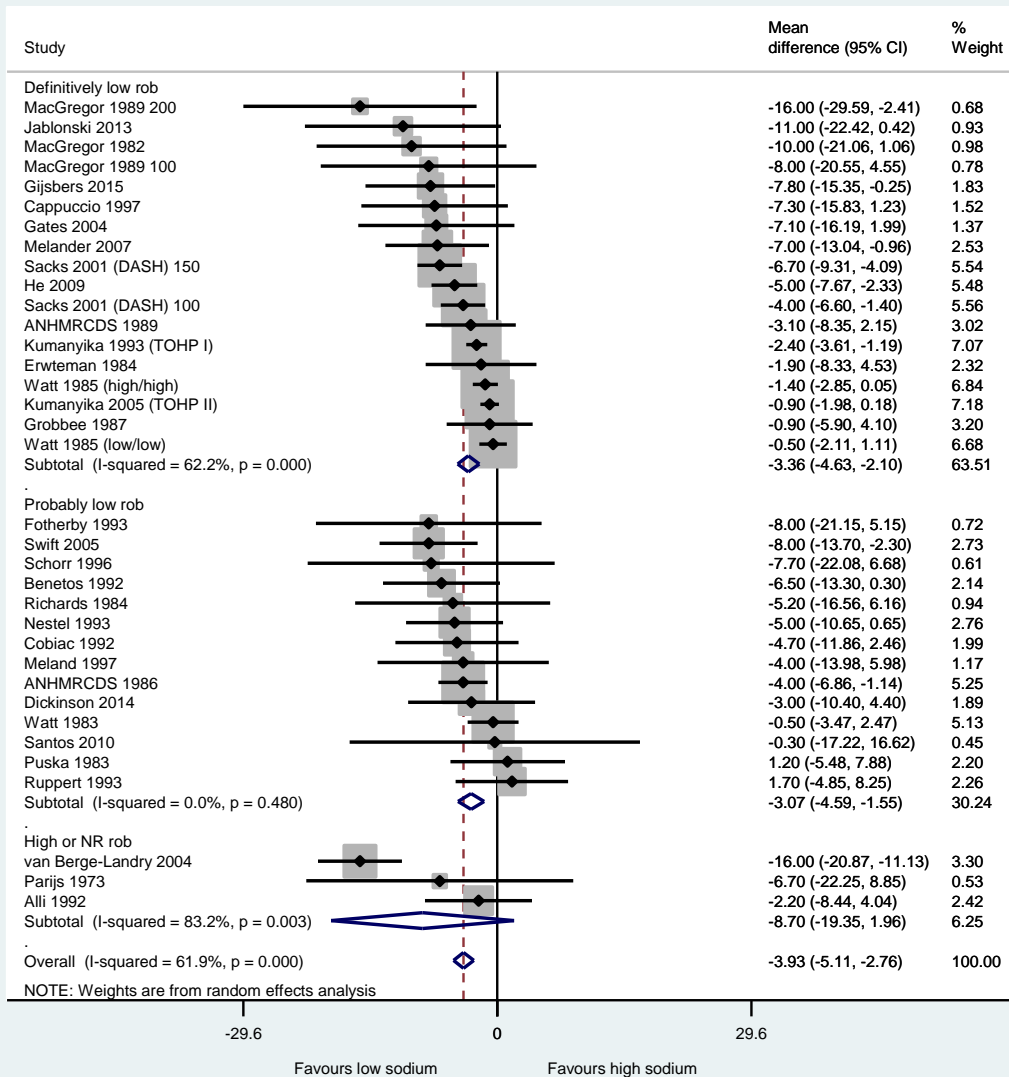

### Systolic blood pressure - Year of publication

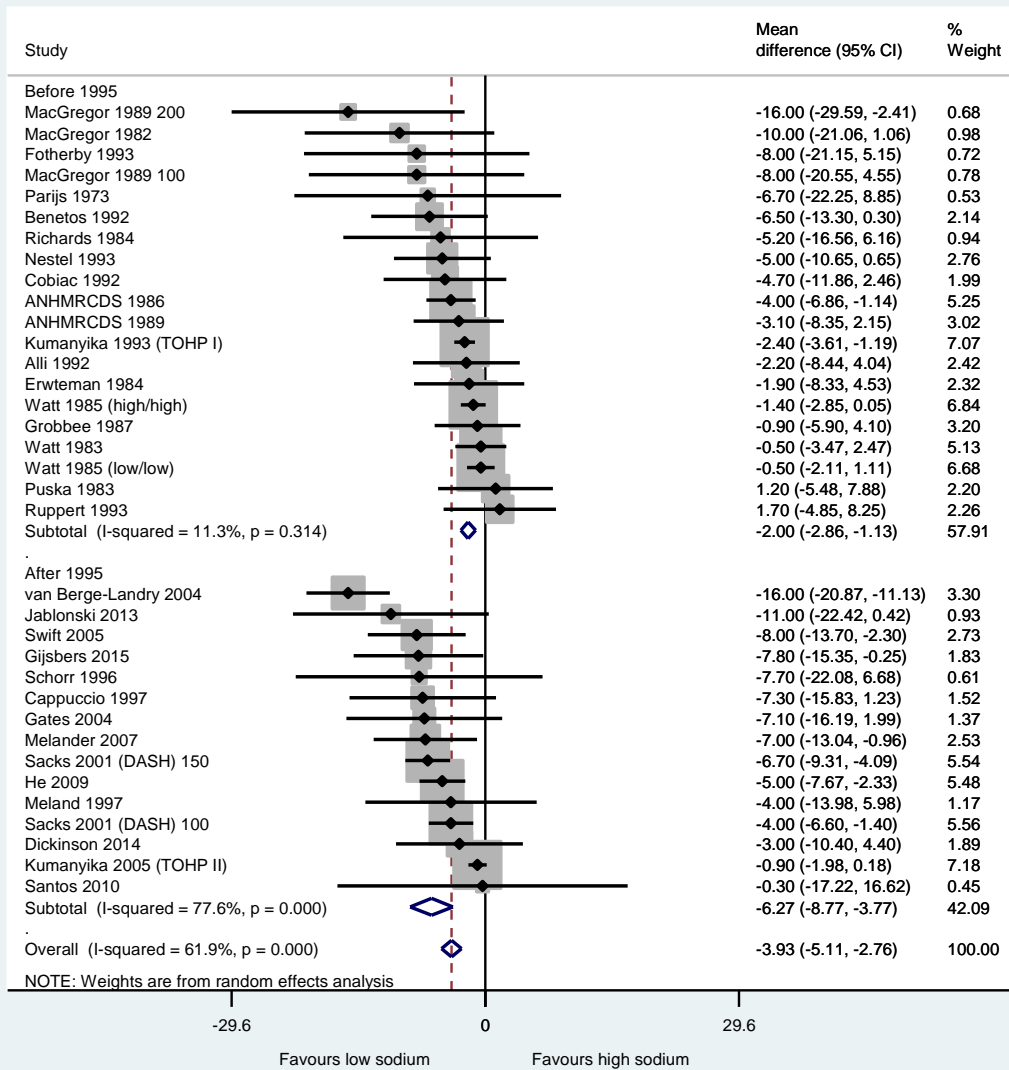

### Systolic blood pressure - Funding

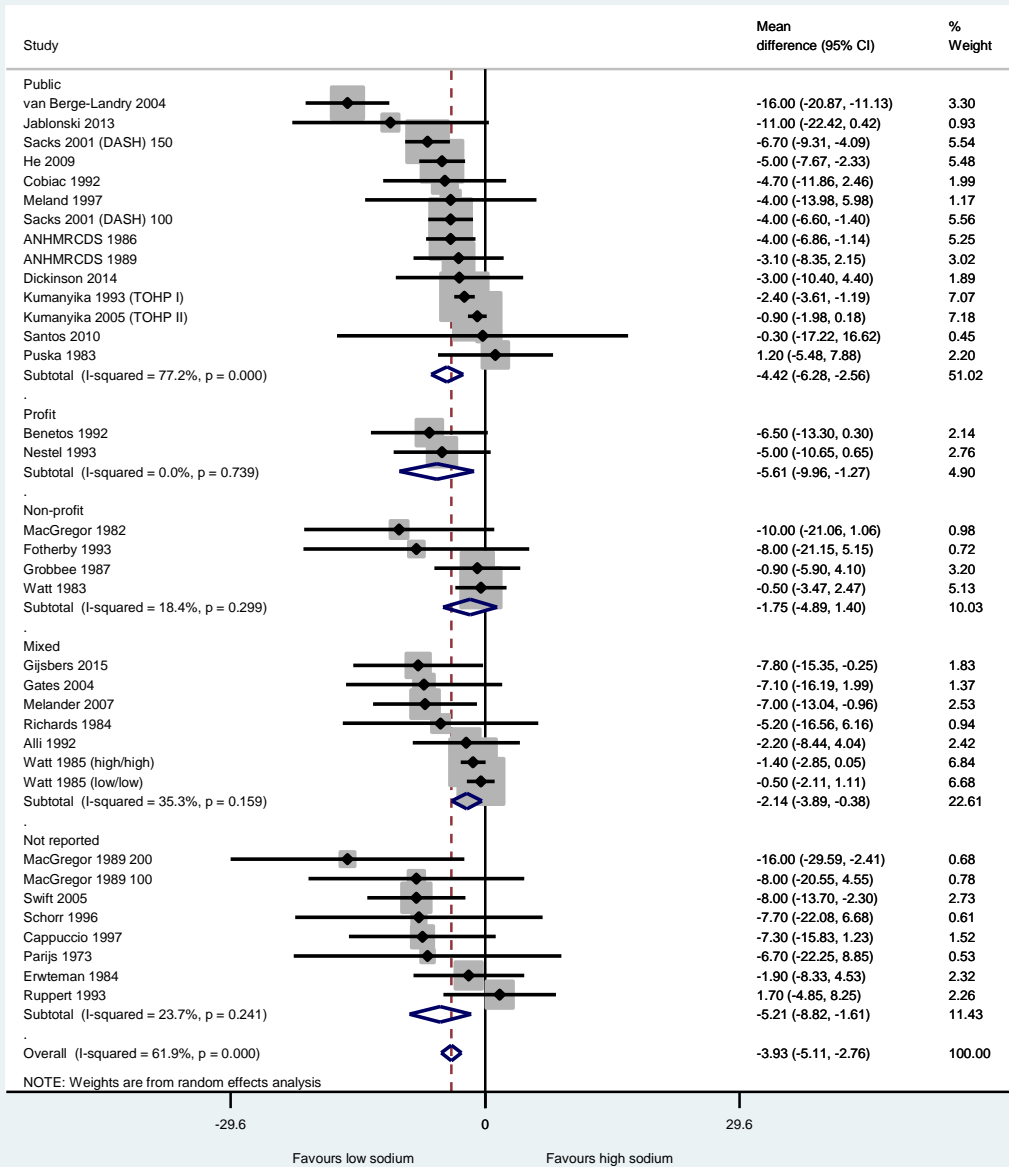



### Diastolic blood pressure - Overall (adults)

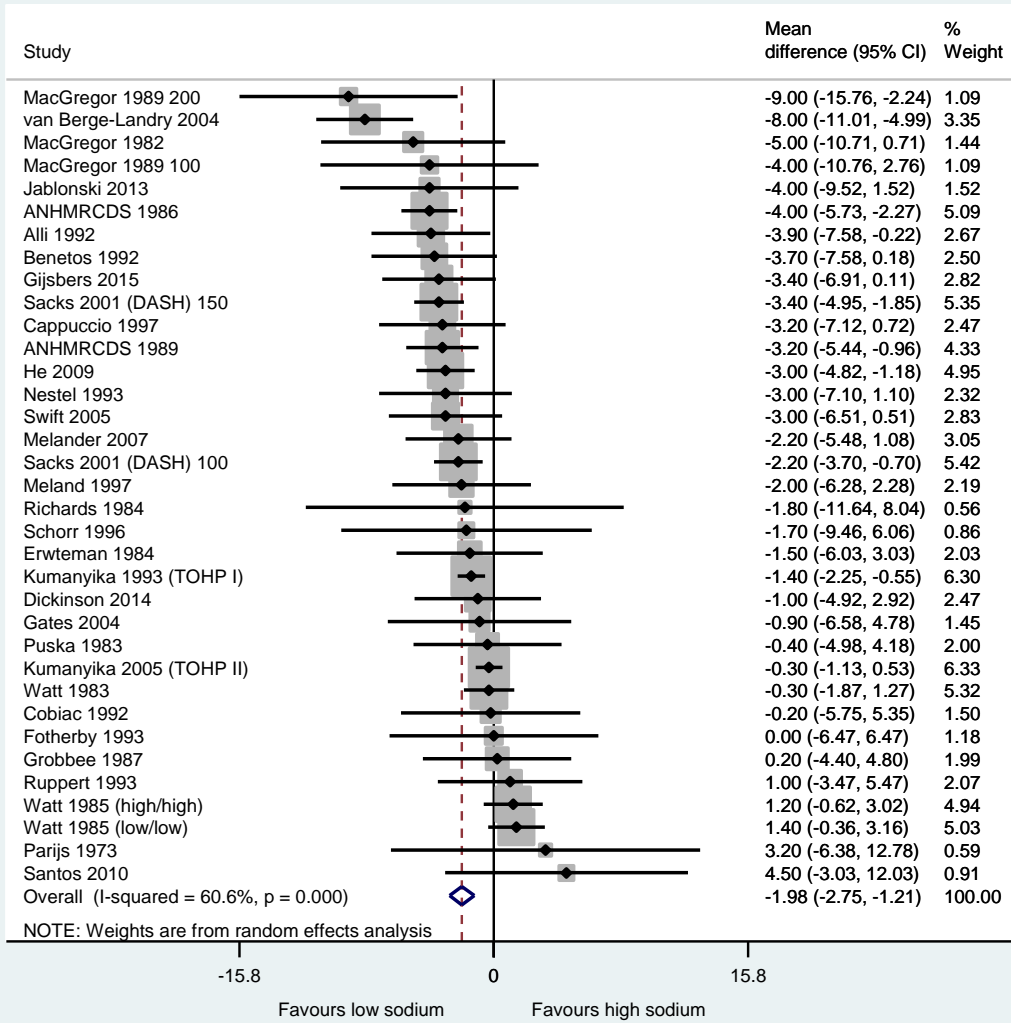

### Diastolic blood pressure - Age < and >= 50 yrs old

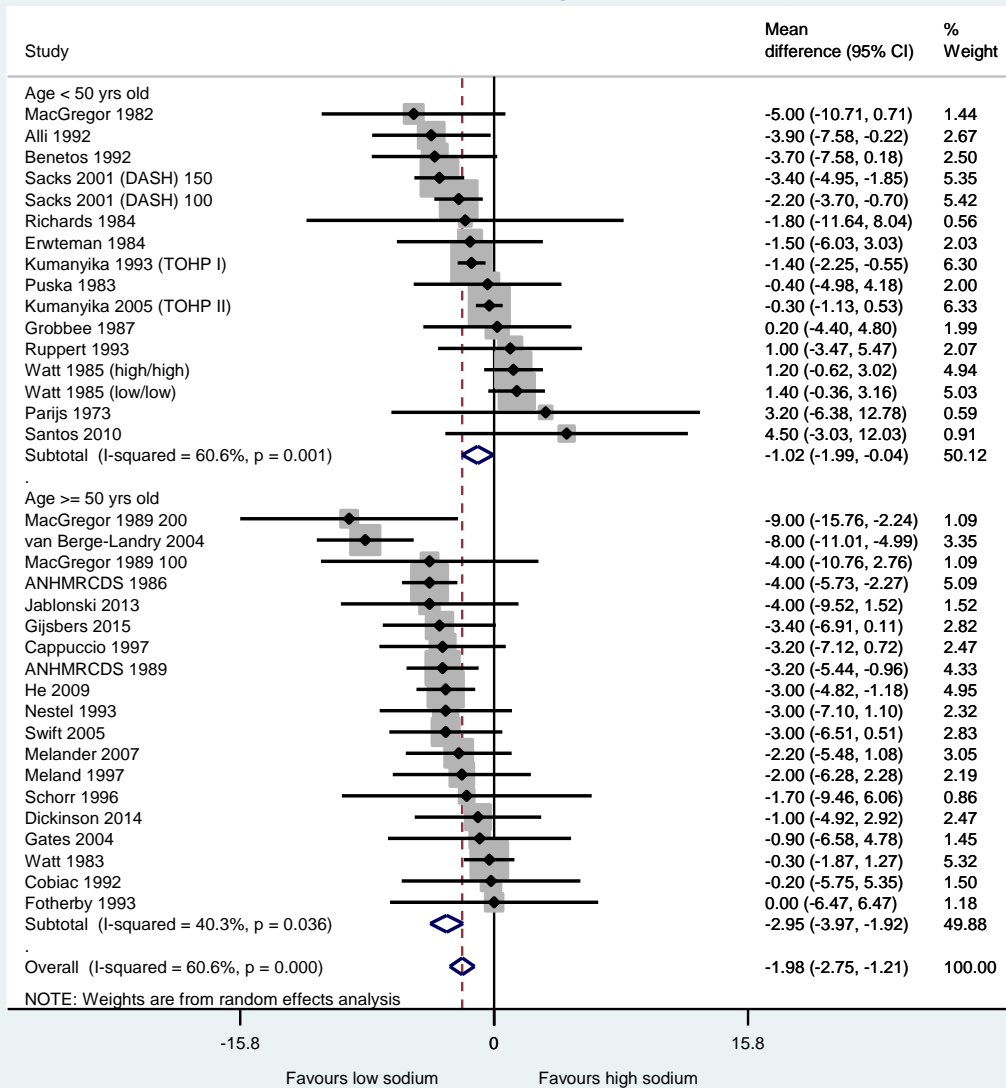

### Diastolic blood pressure - Sex proportion

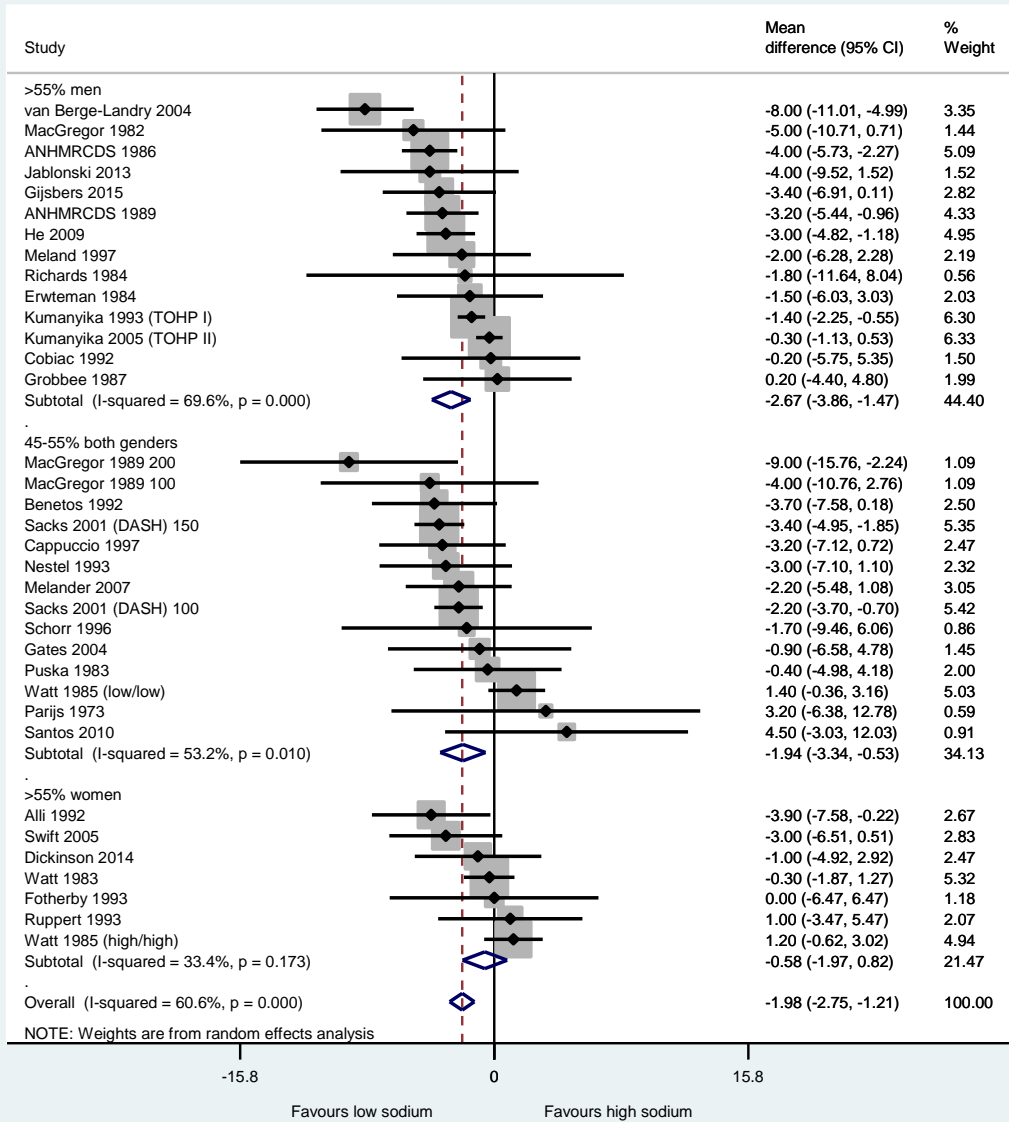

### Diastolic blood pressure - Blood pressure status

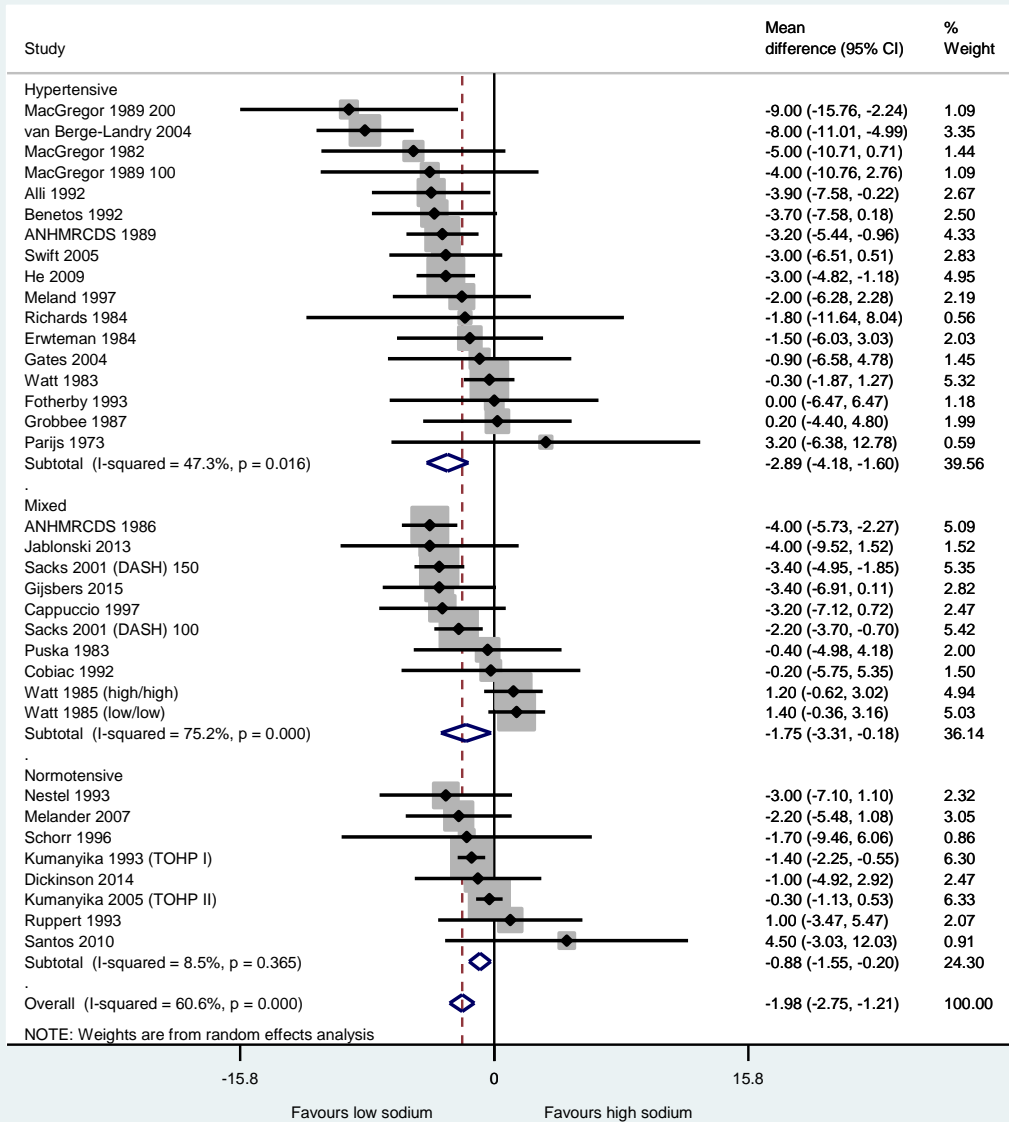

### Diastolic blood pressure - Ethnicity

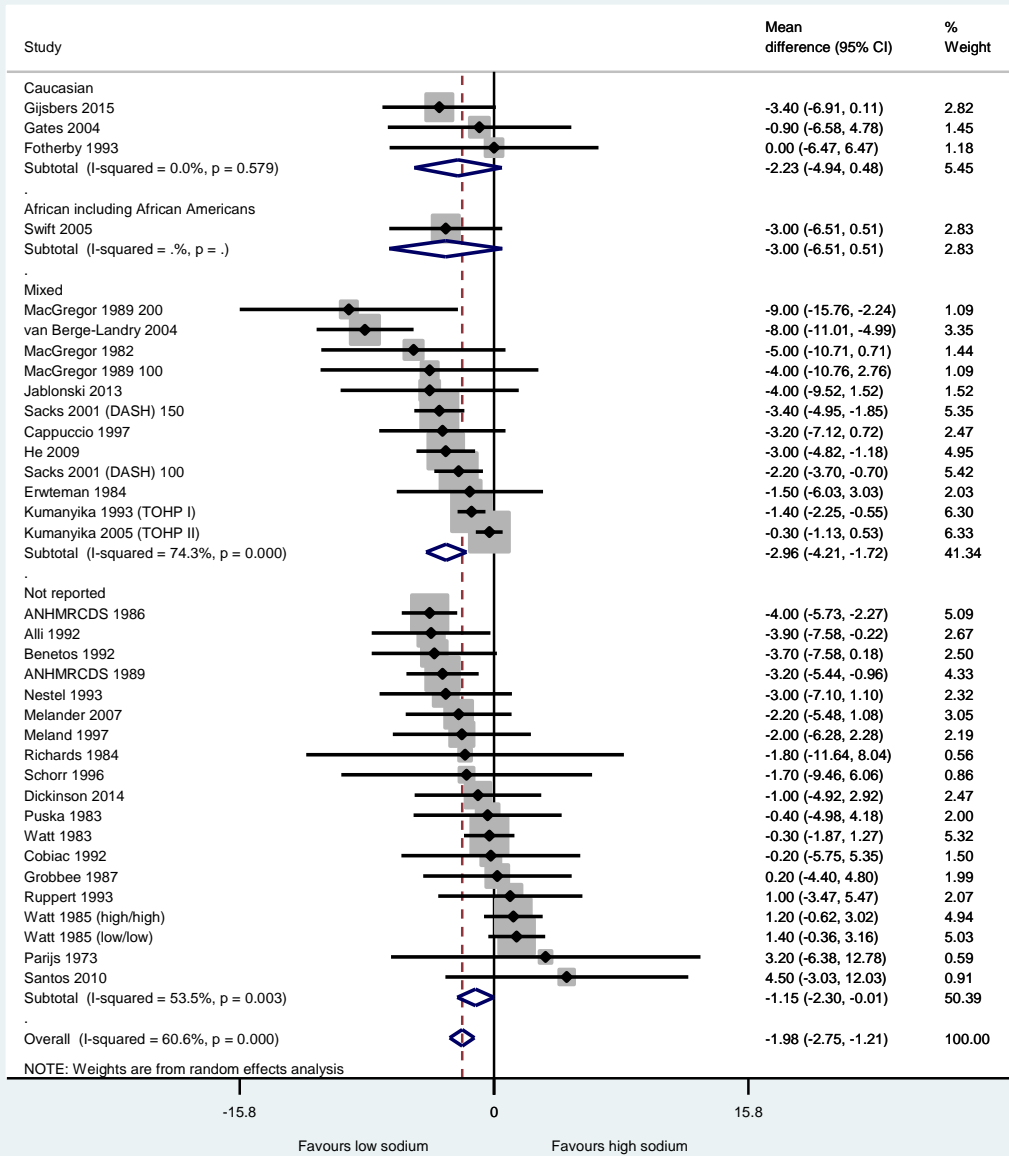

### Diastolic blood pressure - BMI

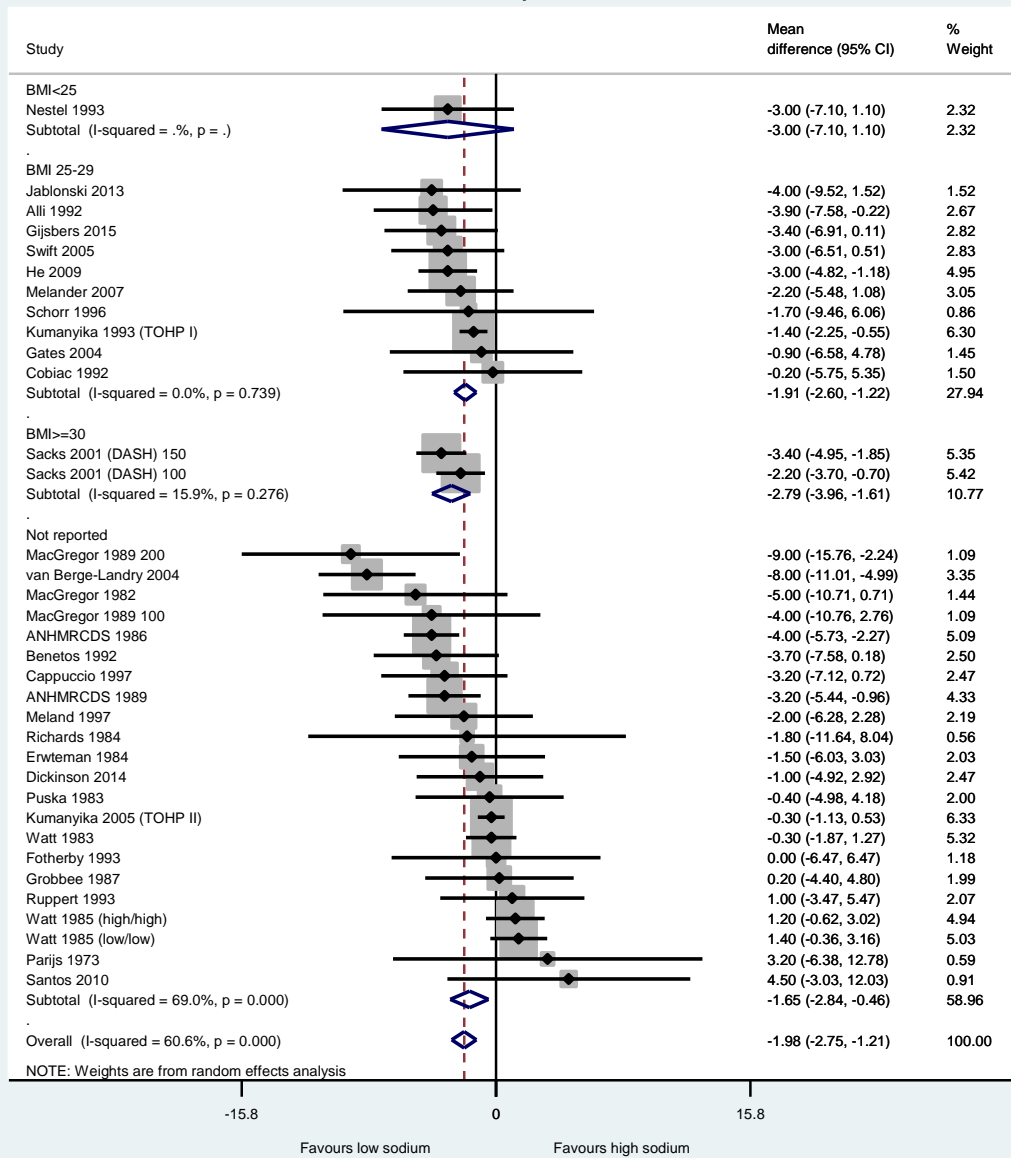

### Diastolic blood pressure - Baseline DBP

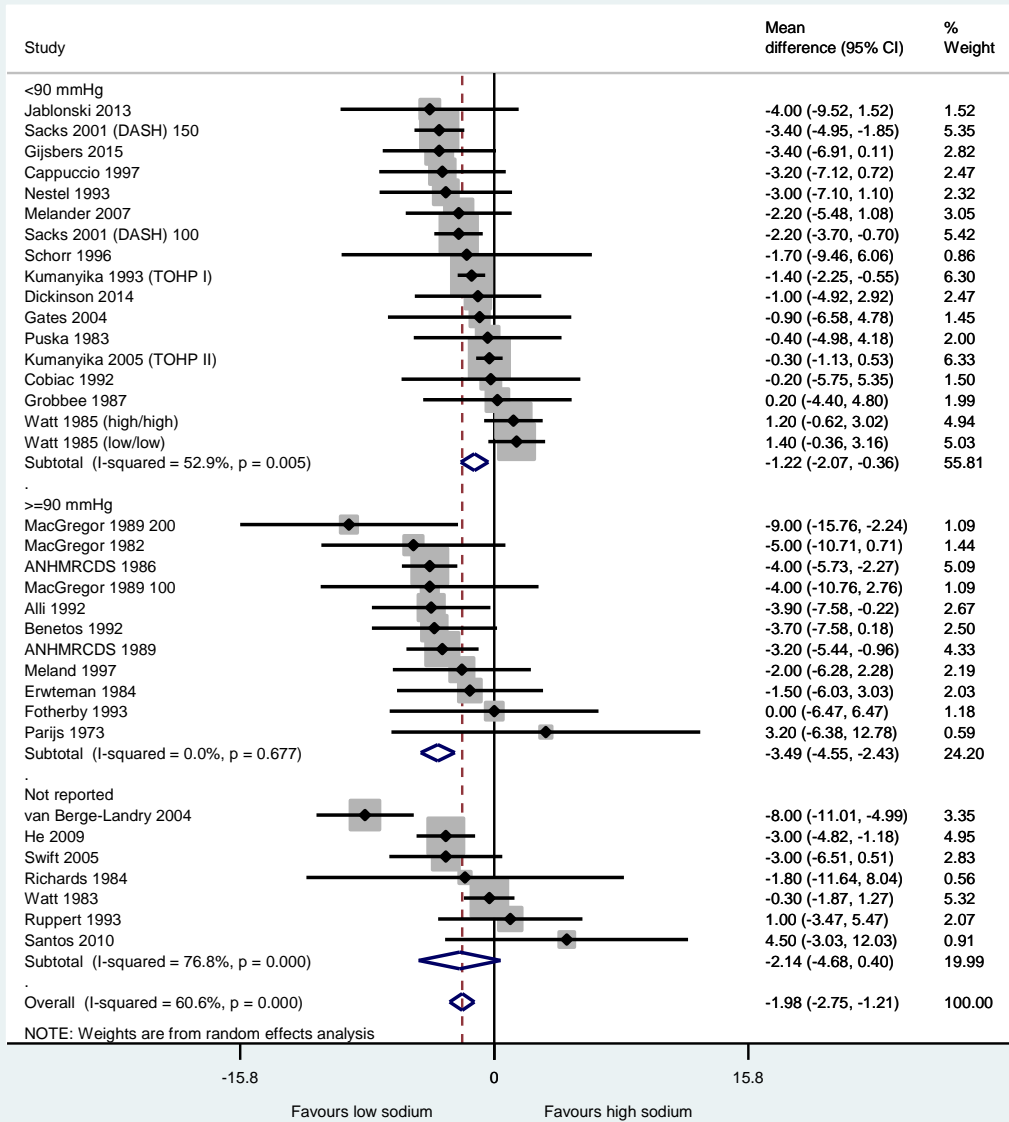

### Diastolic blood pressure - Baseline potassium intake

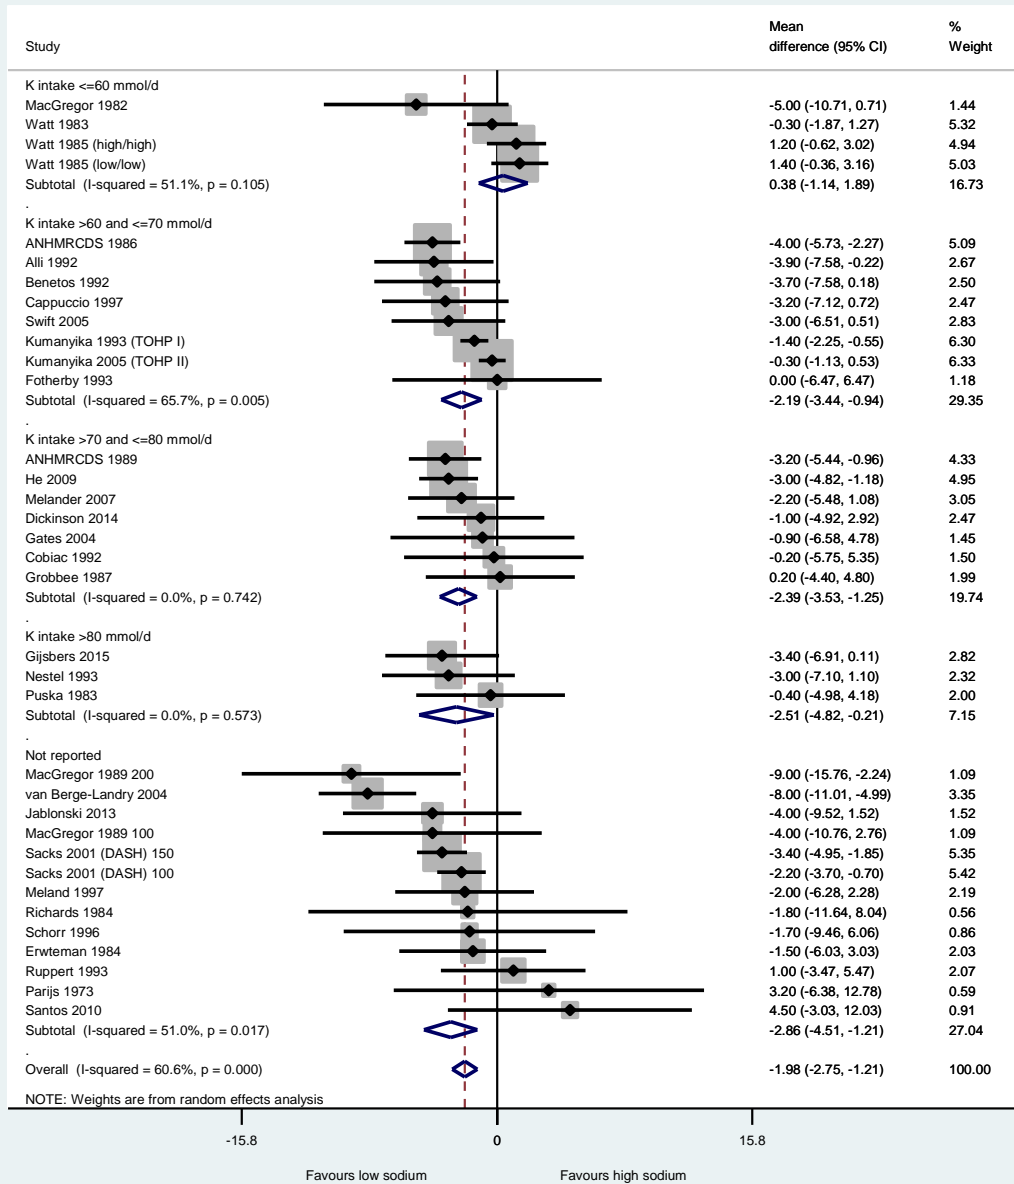



### Diastolic blood pressure - Sodium excretion at baseline

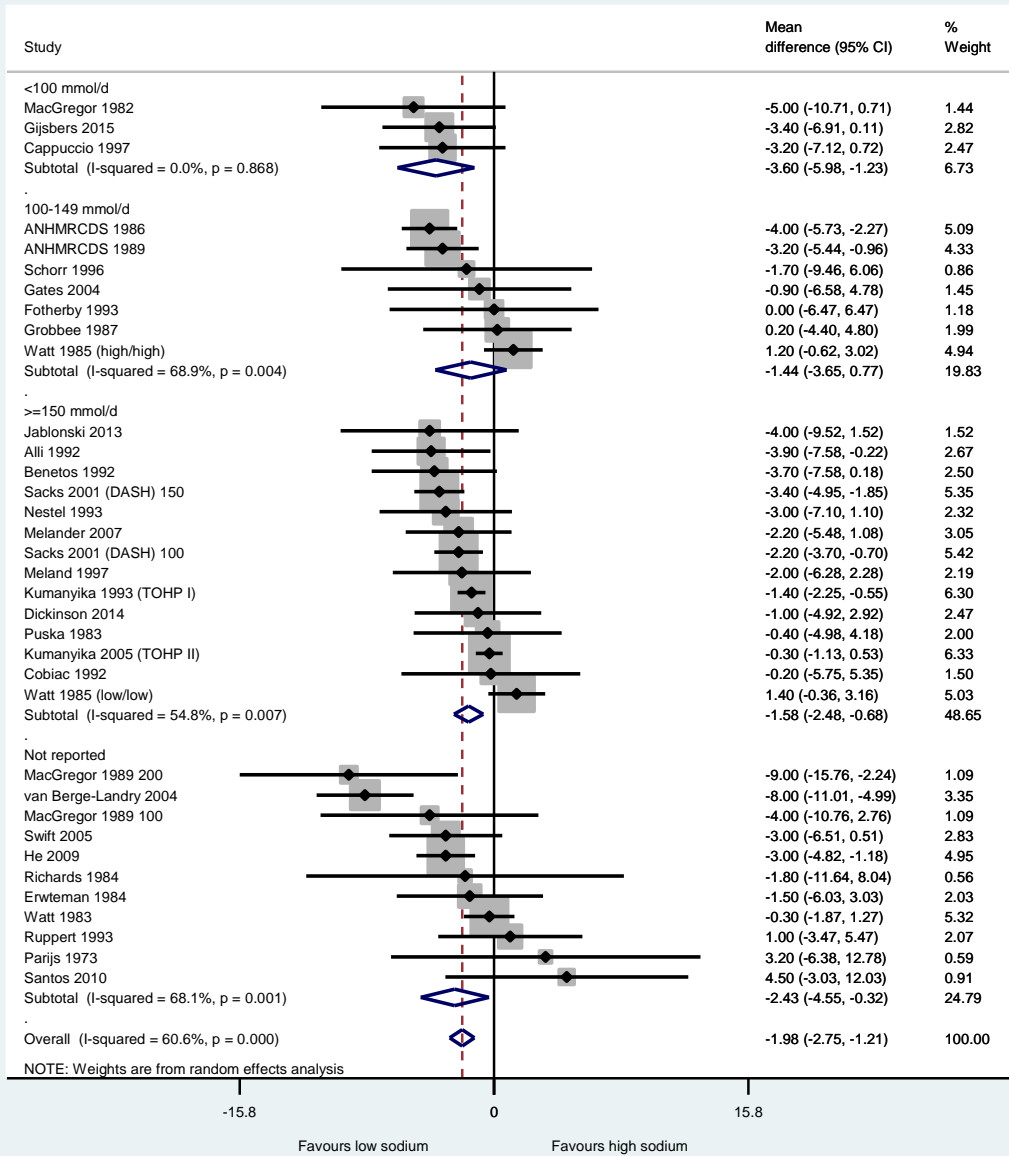

### Diastolic blood pressure - Sodium excretion difference across arms

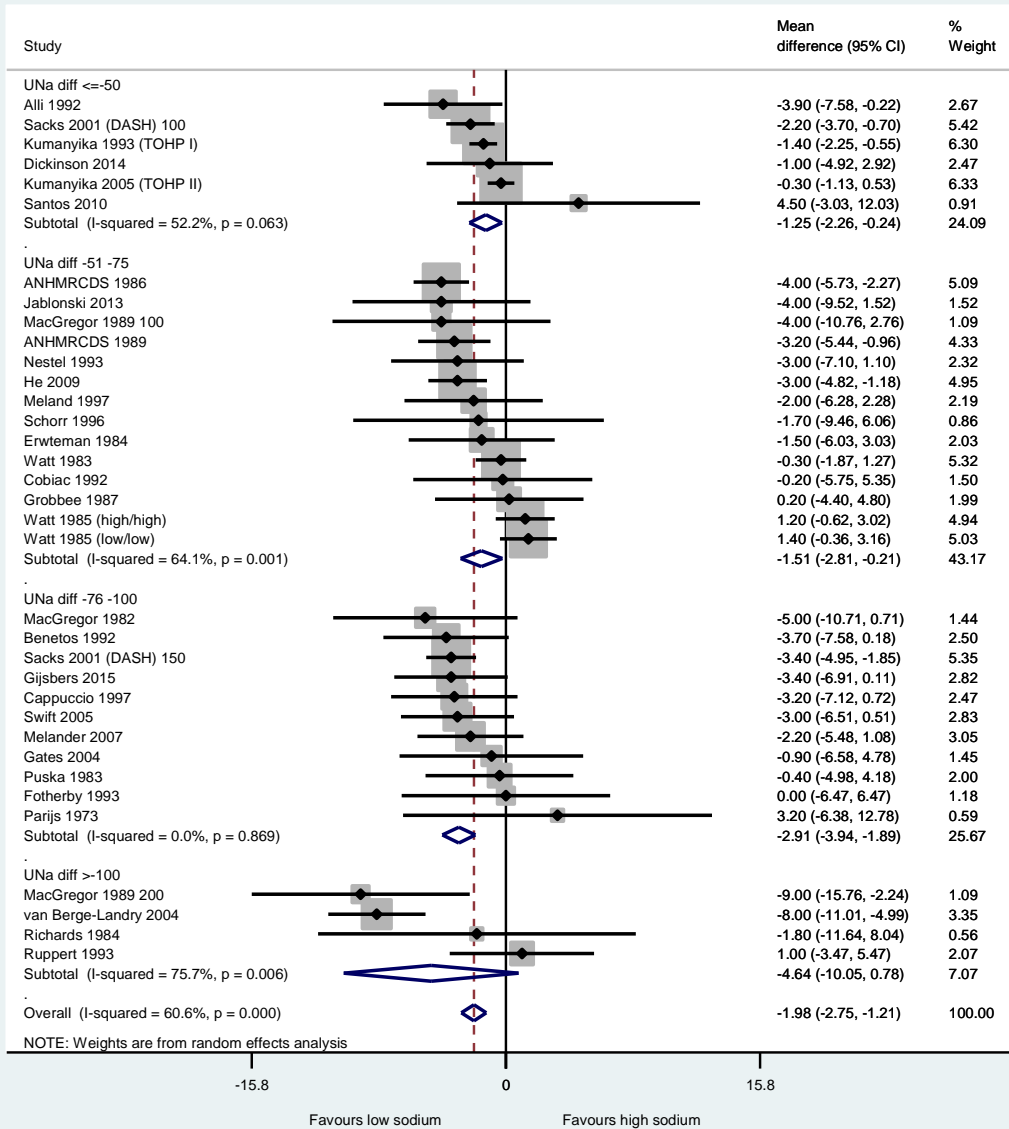

### Diastolic blood pressure - Achieved sodium excretion in high Na group

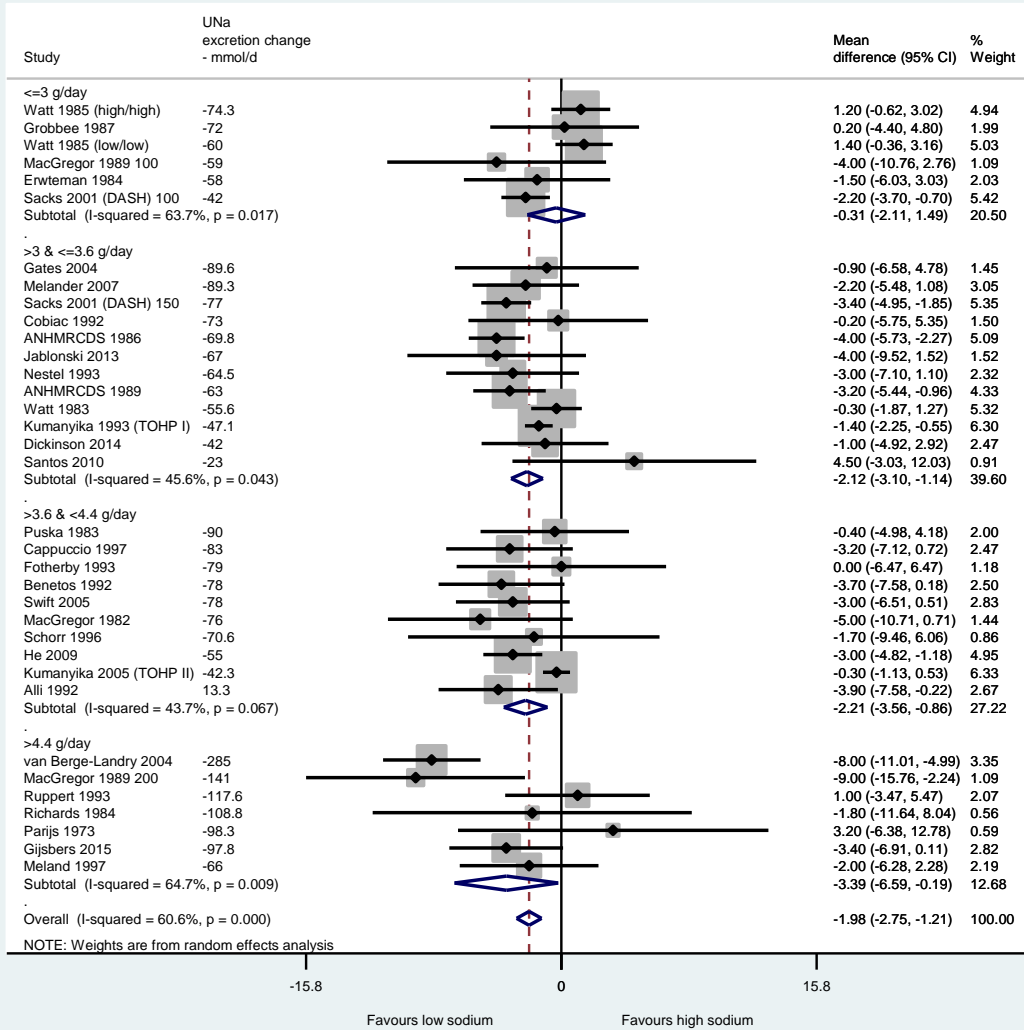

### Diastolic blood pressure - Achieved sodium excretion in low Na group

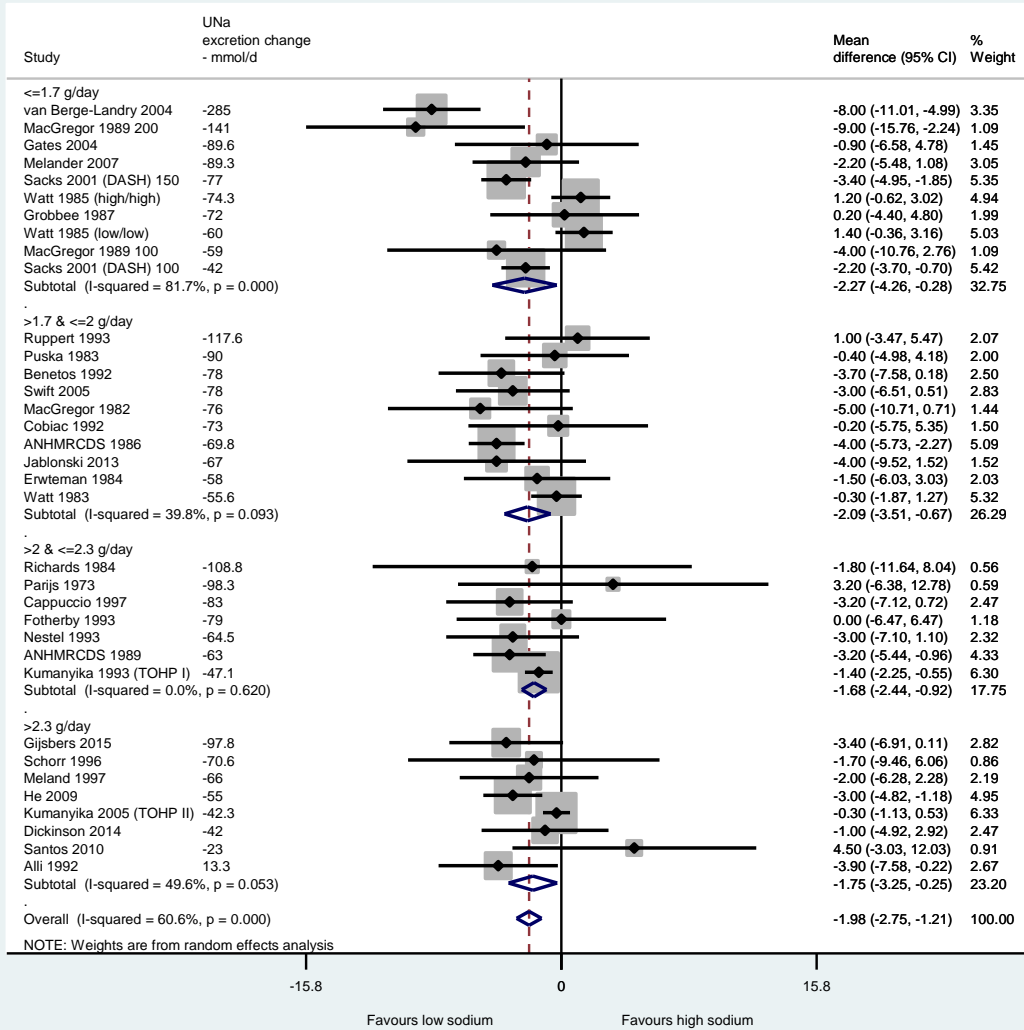

### Diastolic blood pressure - Study design

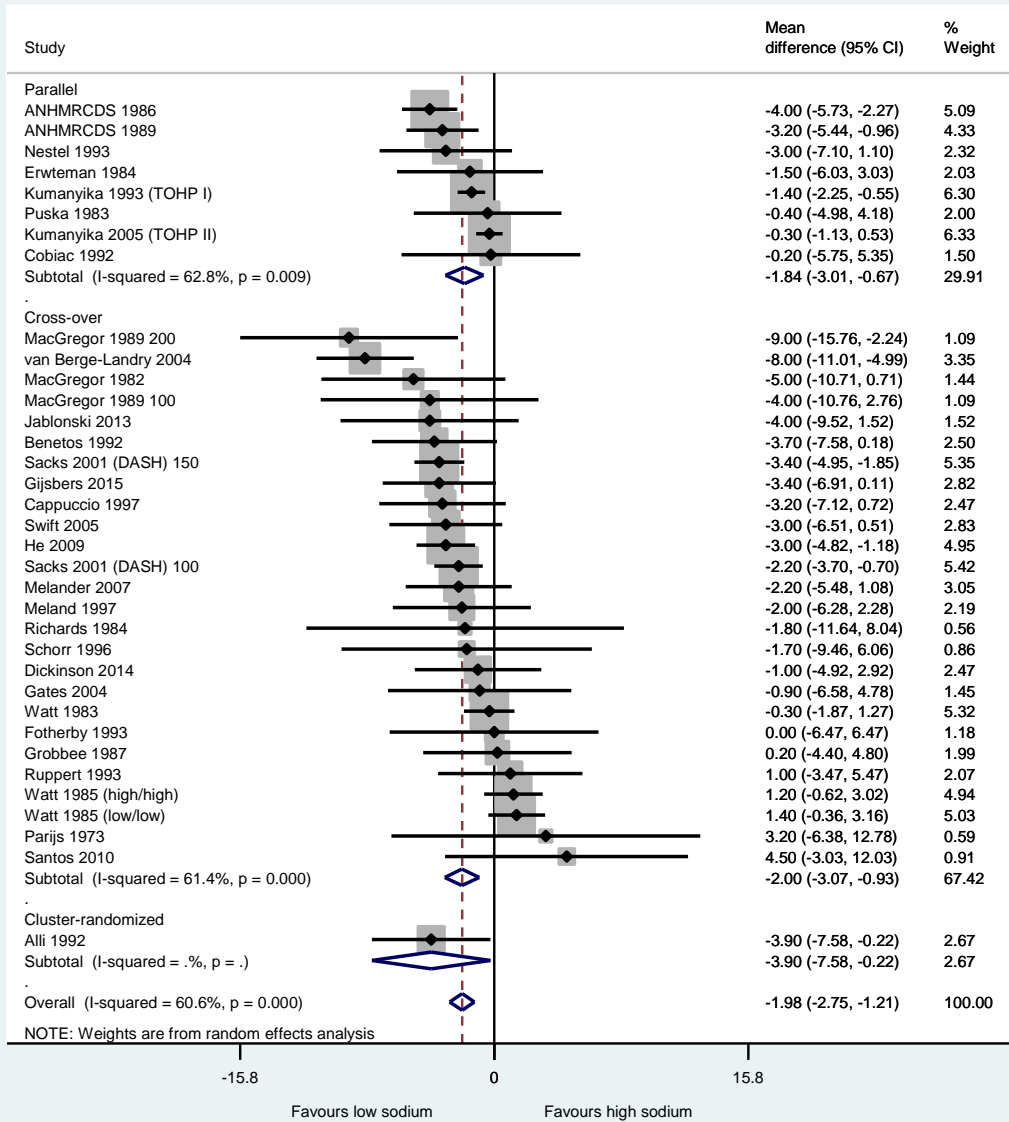

### Diastolic blood pressure - Specific design

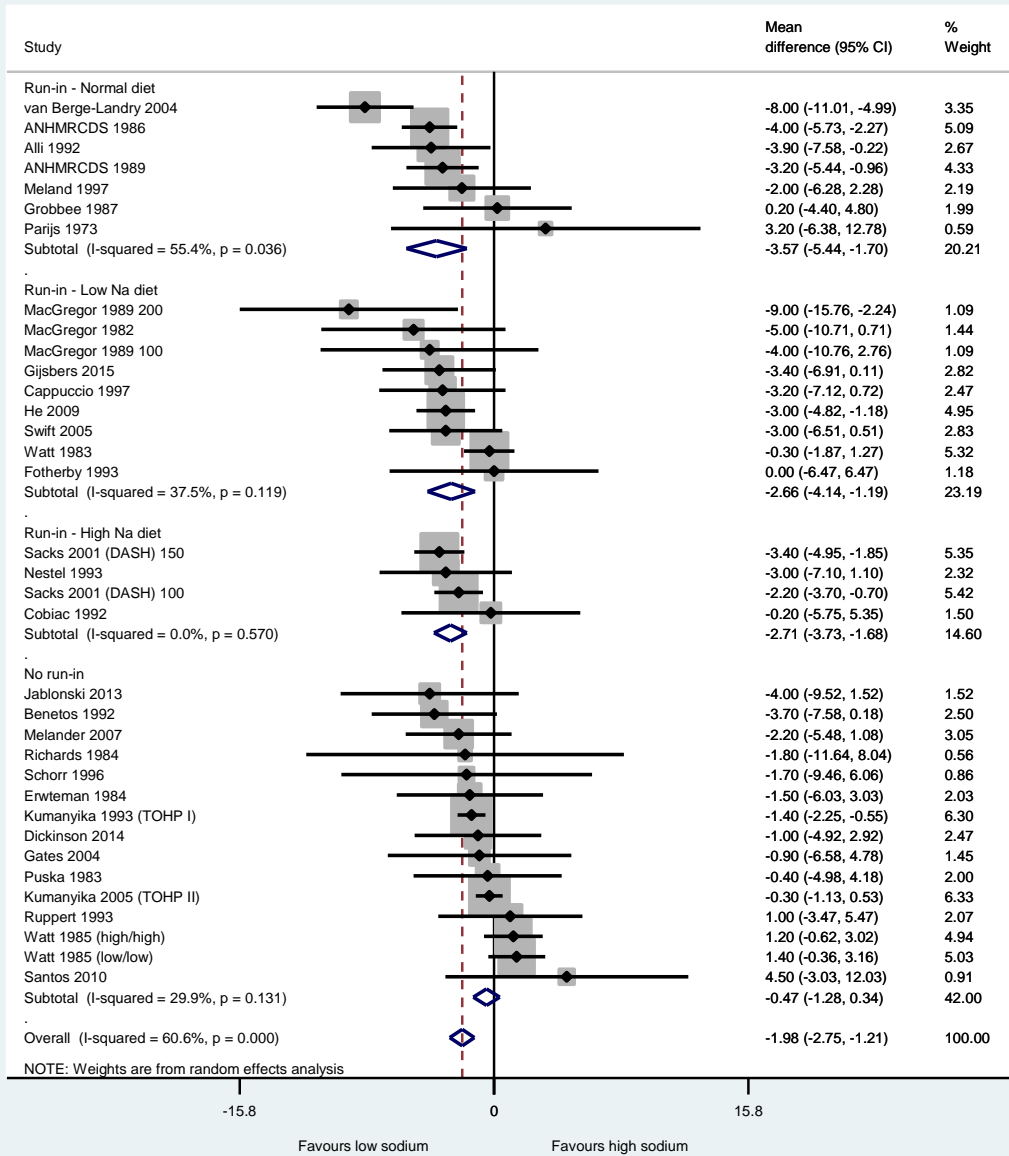

### Diastolic blood pressure - Trial duration

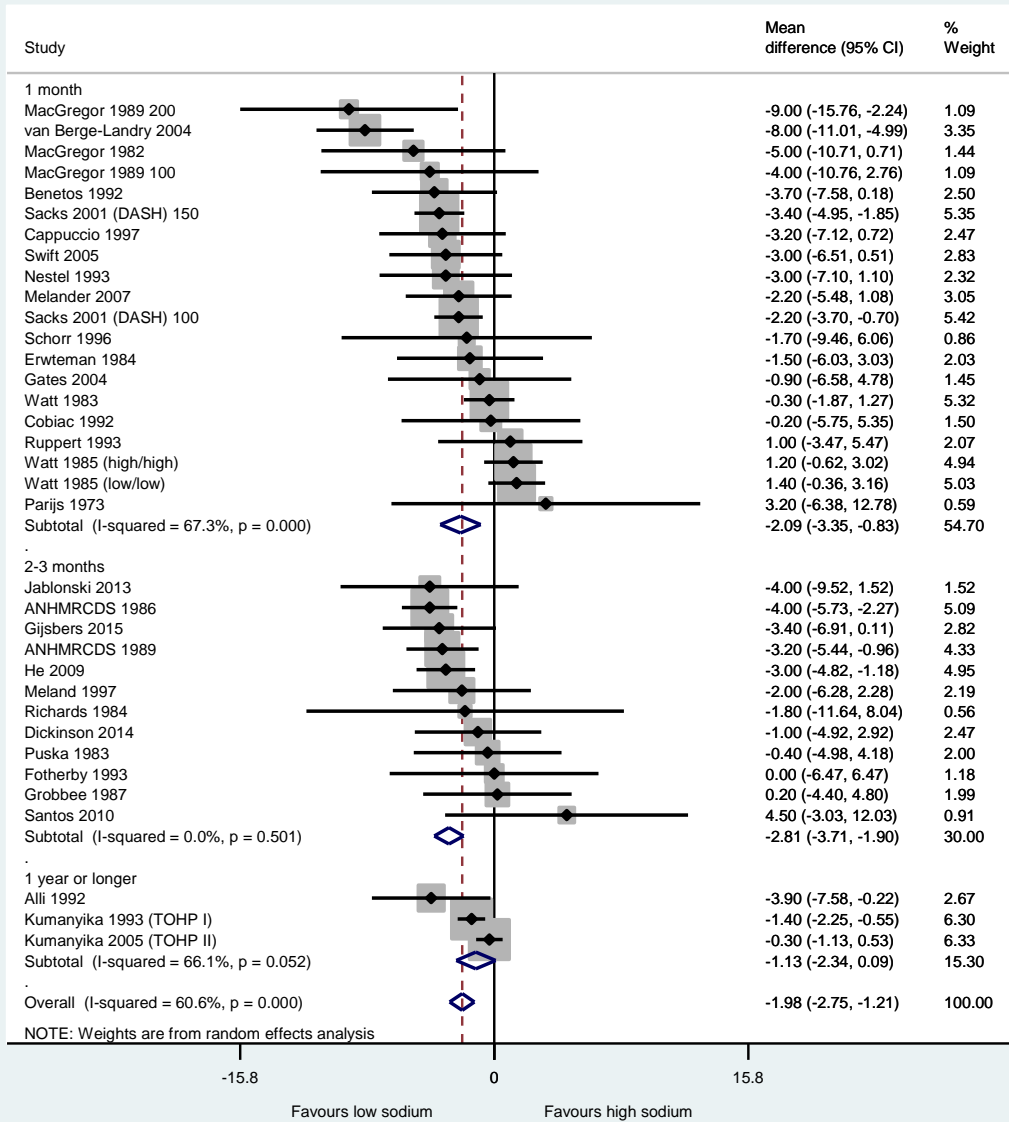

### Diastolic blood pressure - Intervention type

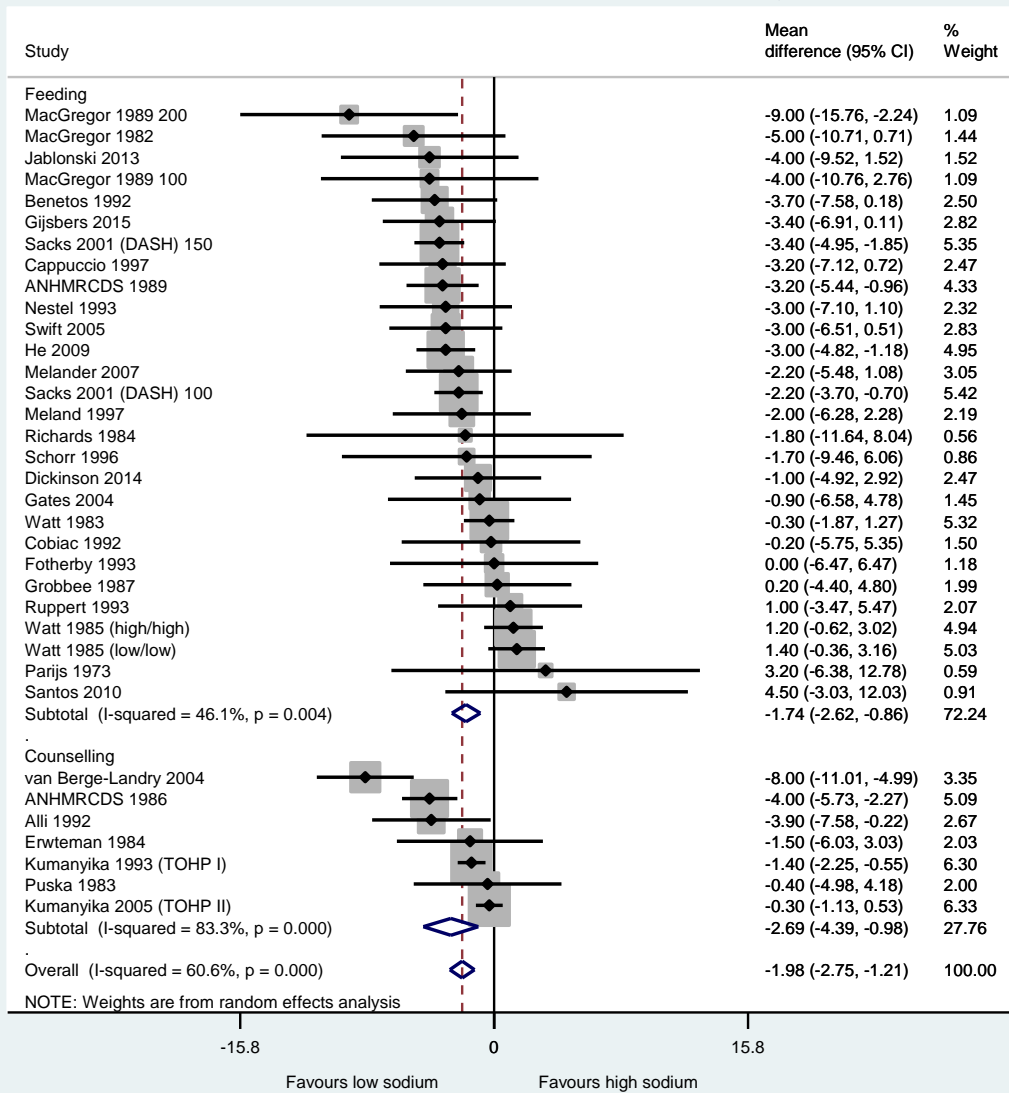



### Diastolic blood pressure - BP measurement method

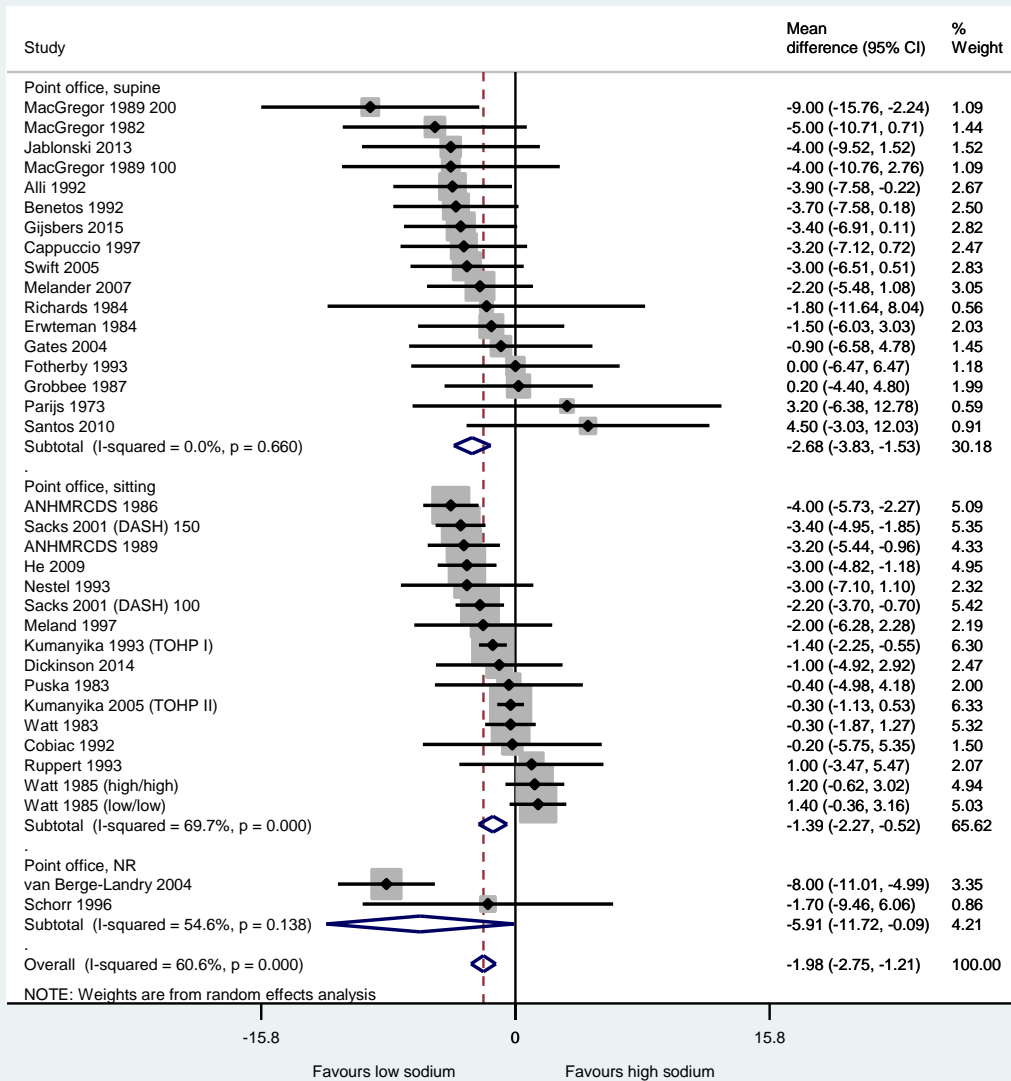

### Diastolic blood pressure - Number of urinary collections

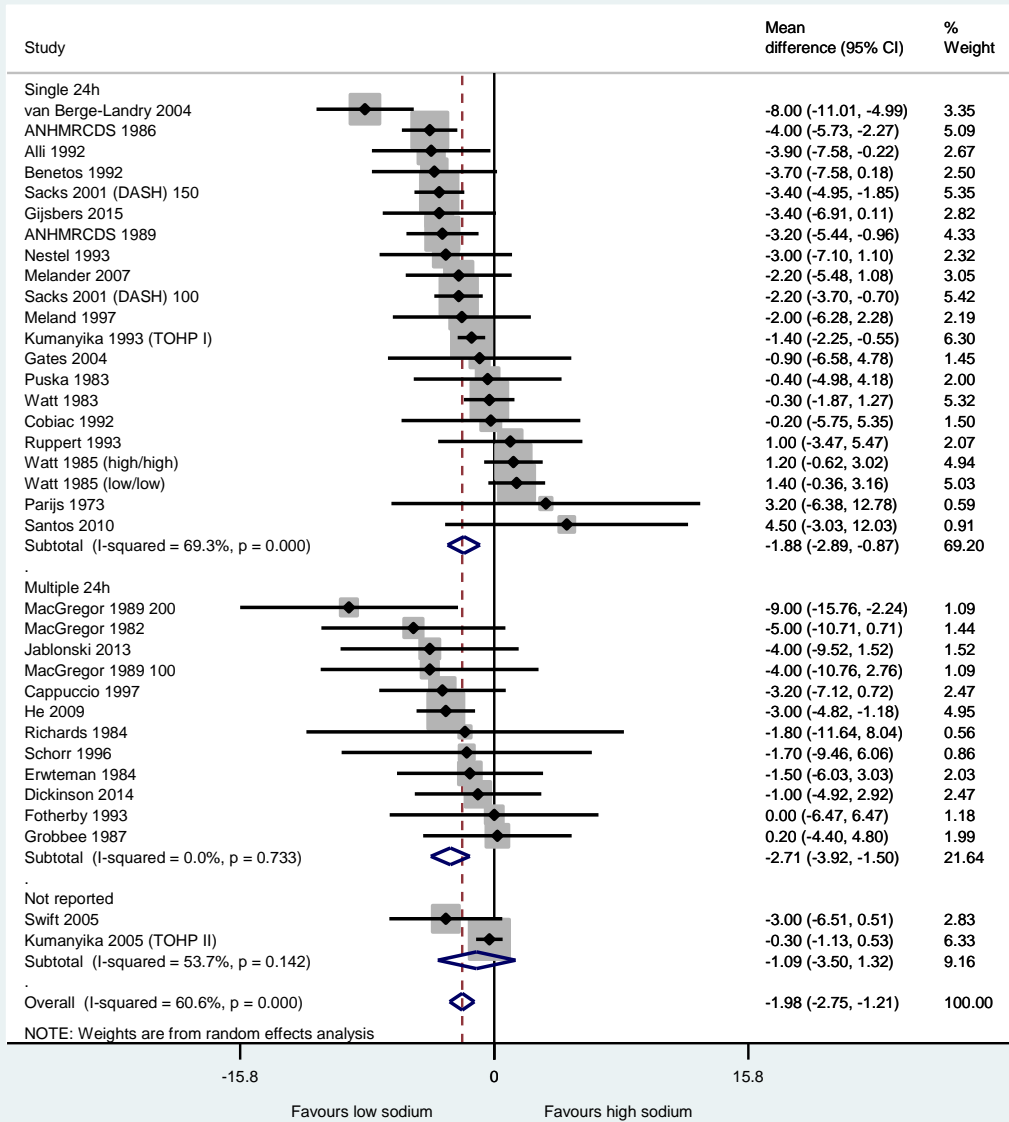

### Diastolic blood pressure - Risk of Bias TIER

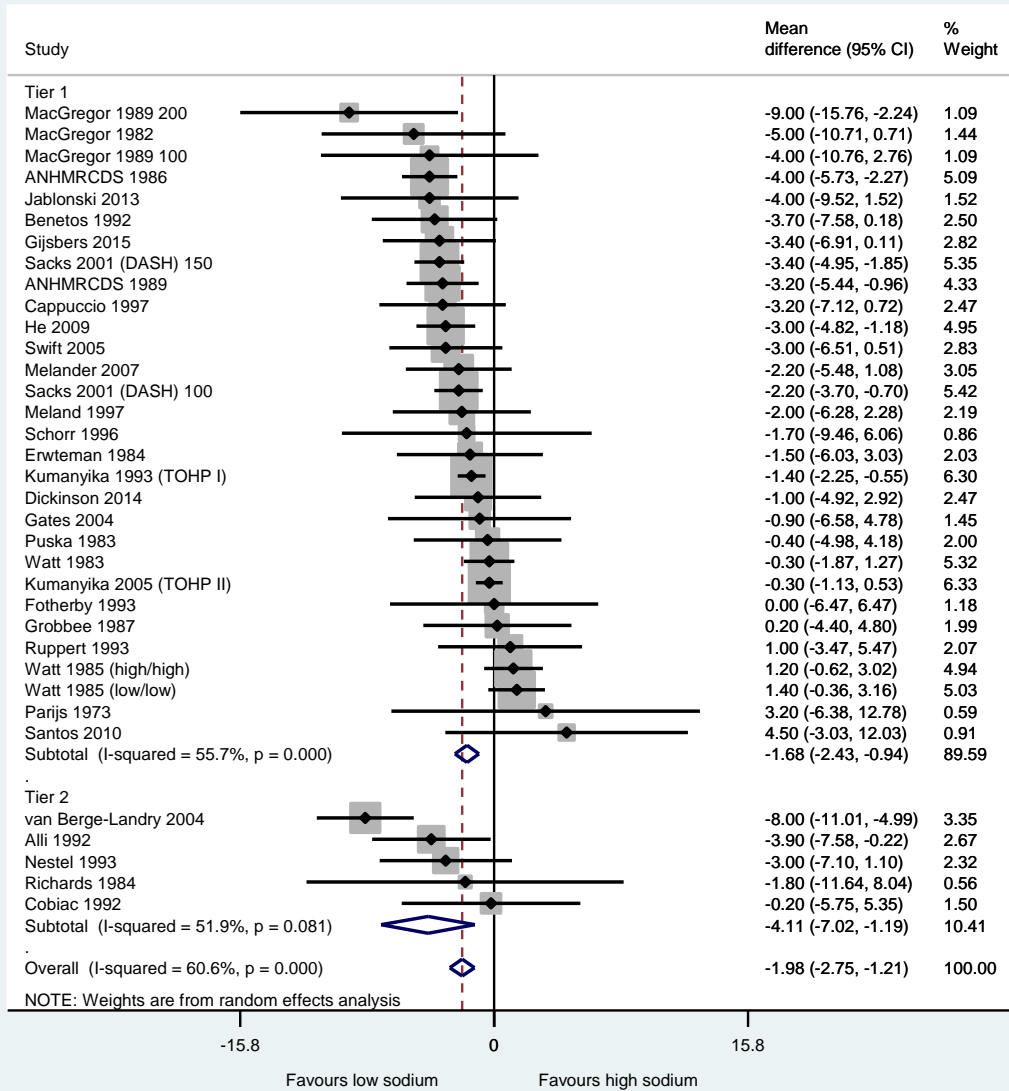

### Diastolic blood pressure - Risk of Bias OUTCOME

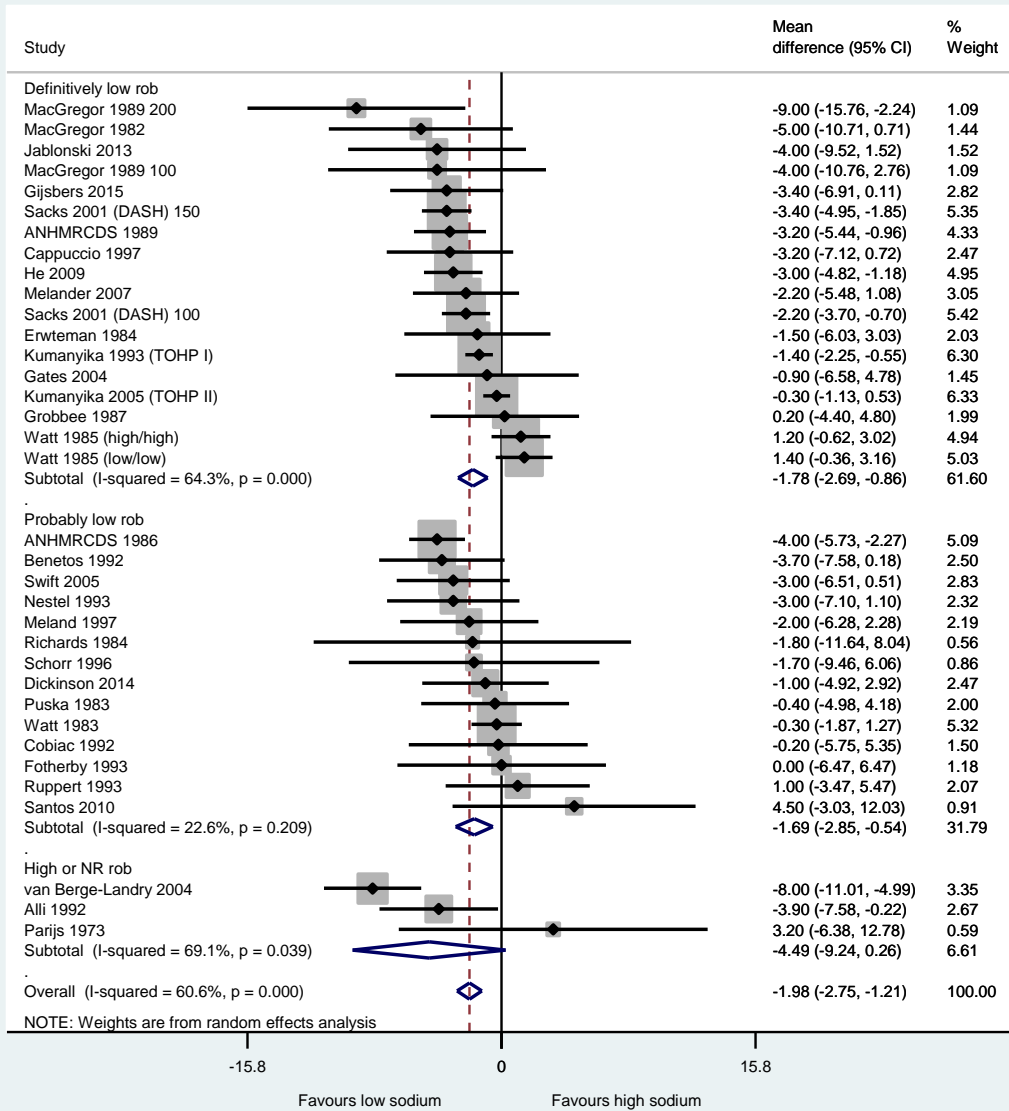

### Diastolic blood pressure - Year of publication

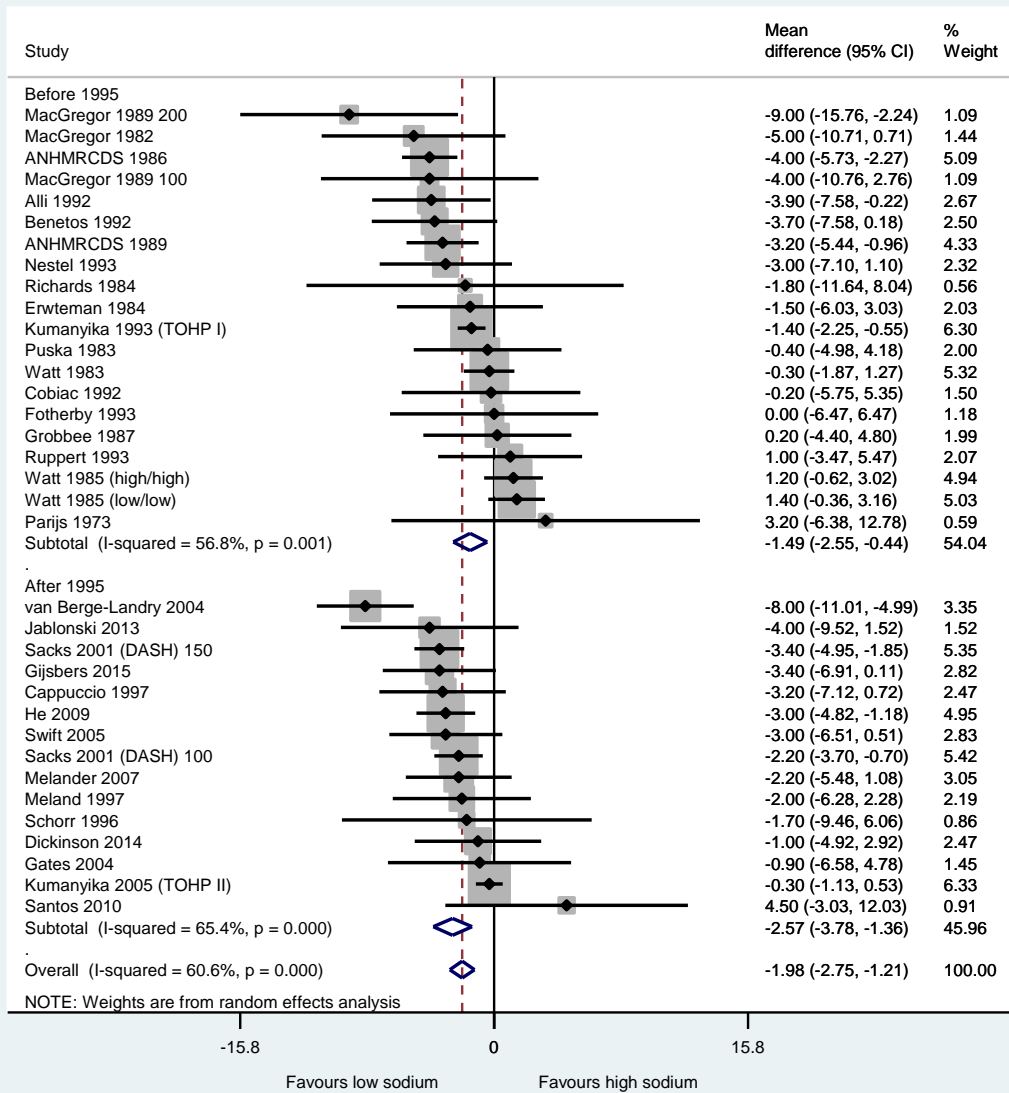

### Diastolic blood pressure - Funding

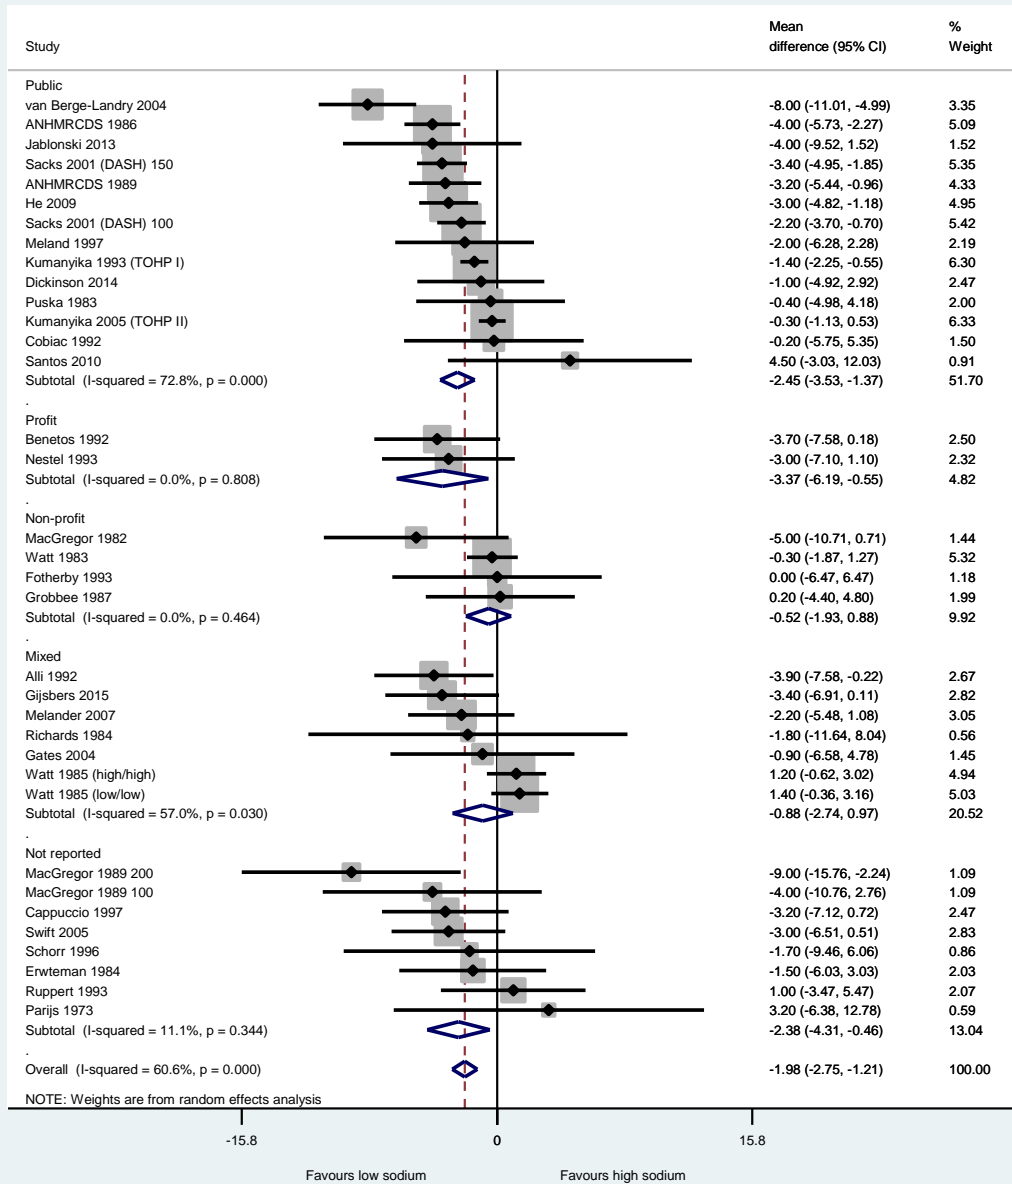

## Appendix I - Forest plots at arm level: subgroup analyses

The first overall plot reports all mean BP absolute values by trial's arm, while in the subgroup analyses plots only pooled estimates by subgroup are reported together with their 95% confidence and prediction intervals (arms not reported for sake of visualisation). Correspondent subgroup variable values can be found in Appendix A, where study-level characteristics are described.

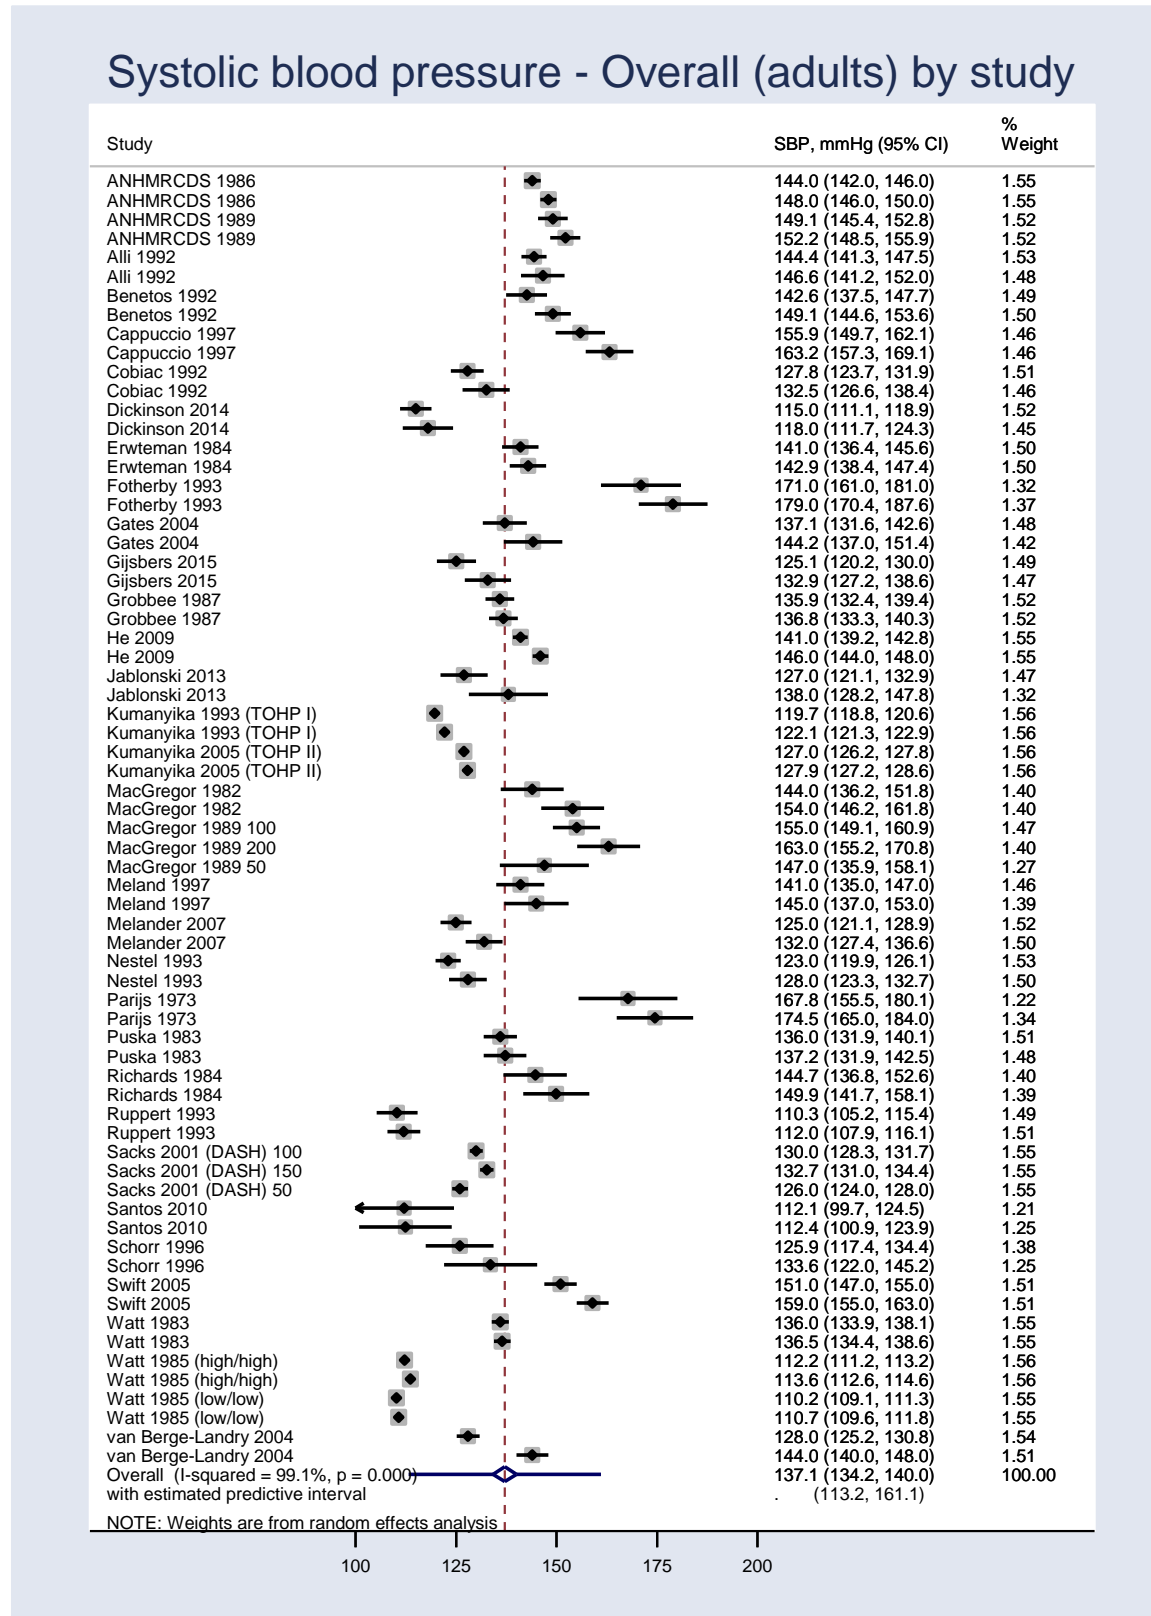

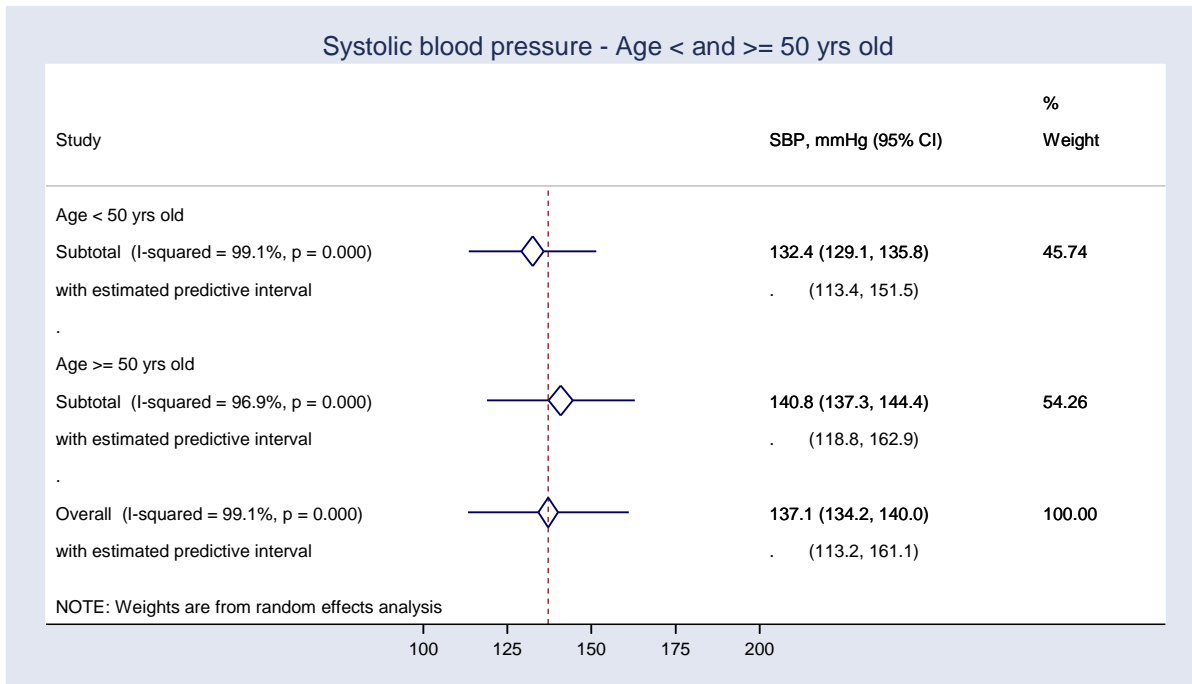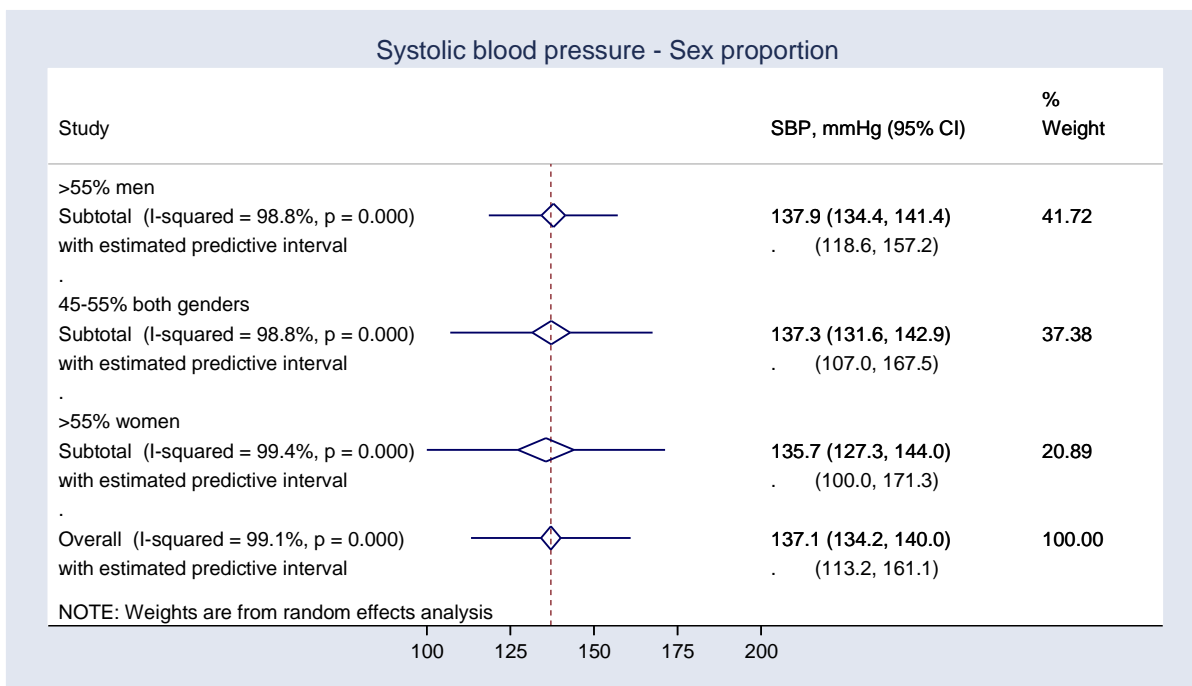



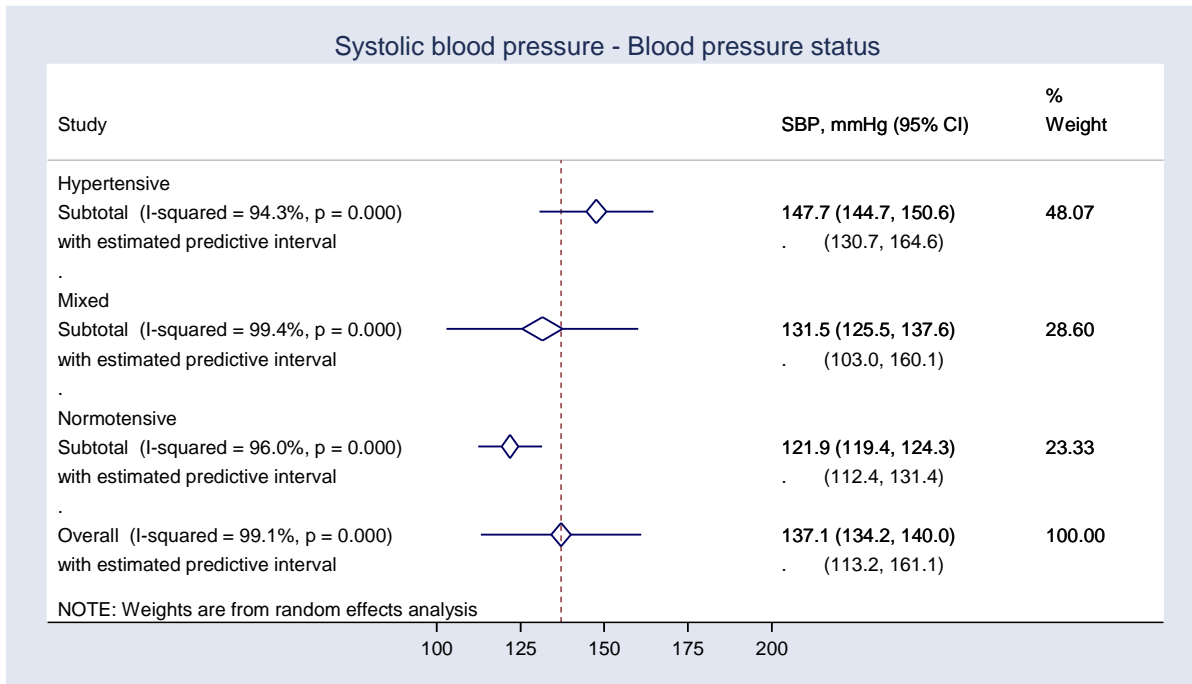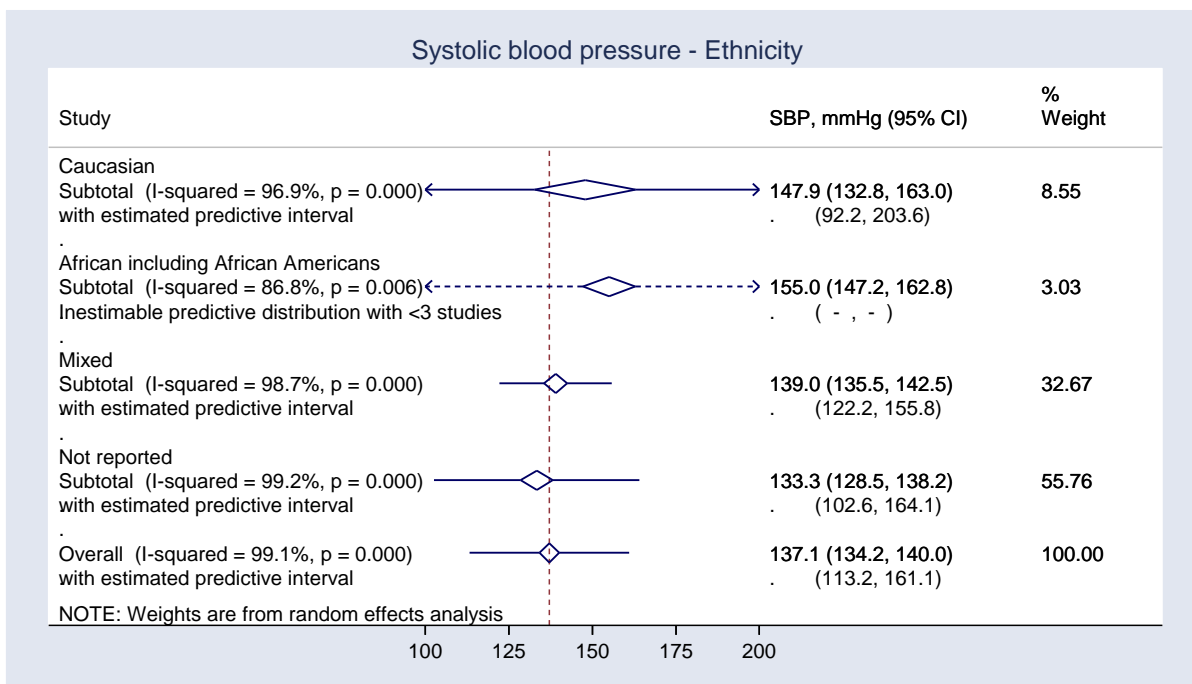

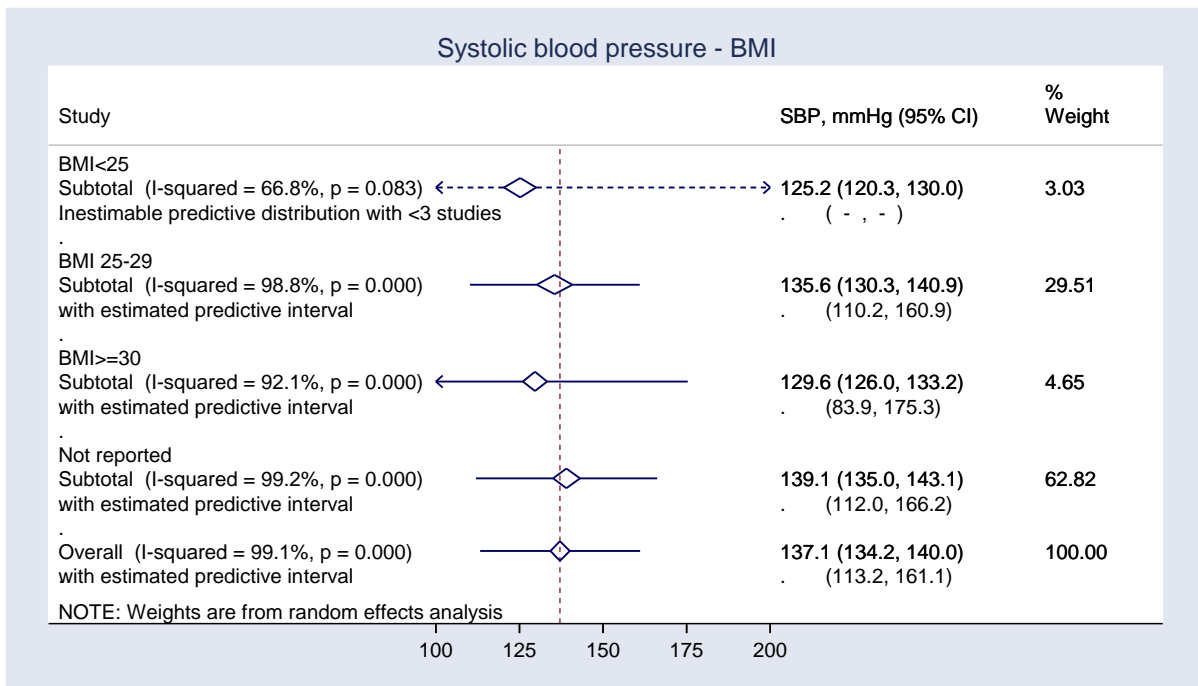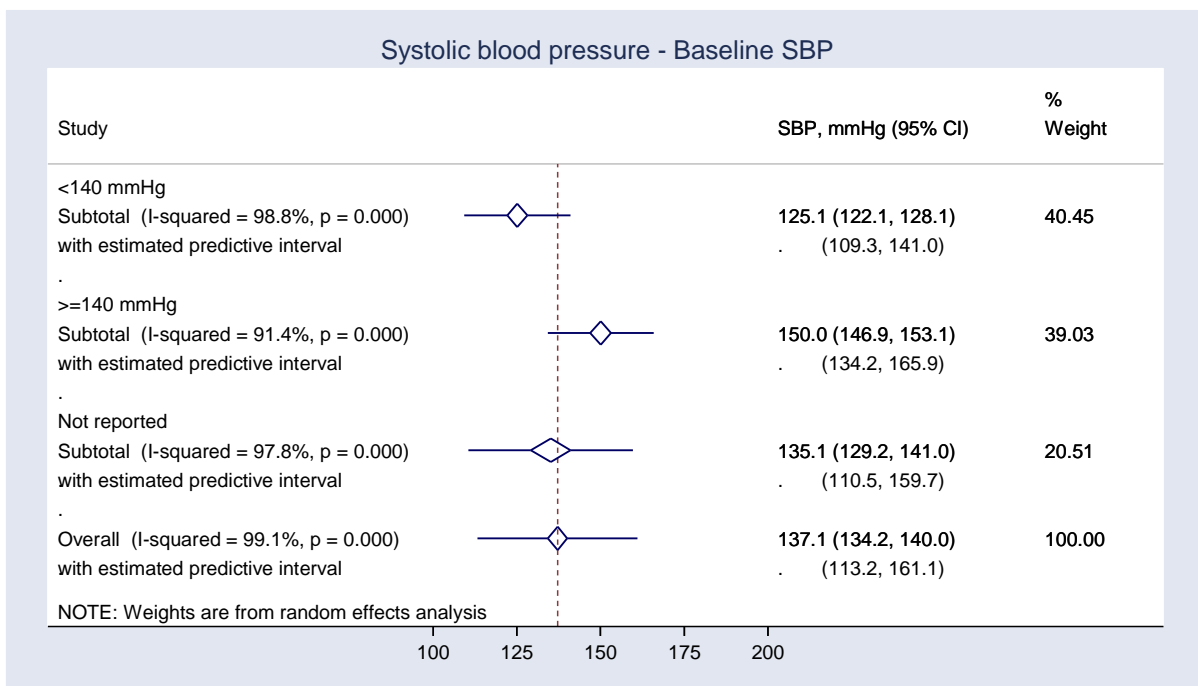

Systolic blood pressure - Baseline potassium intake

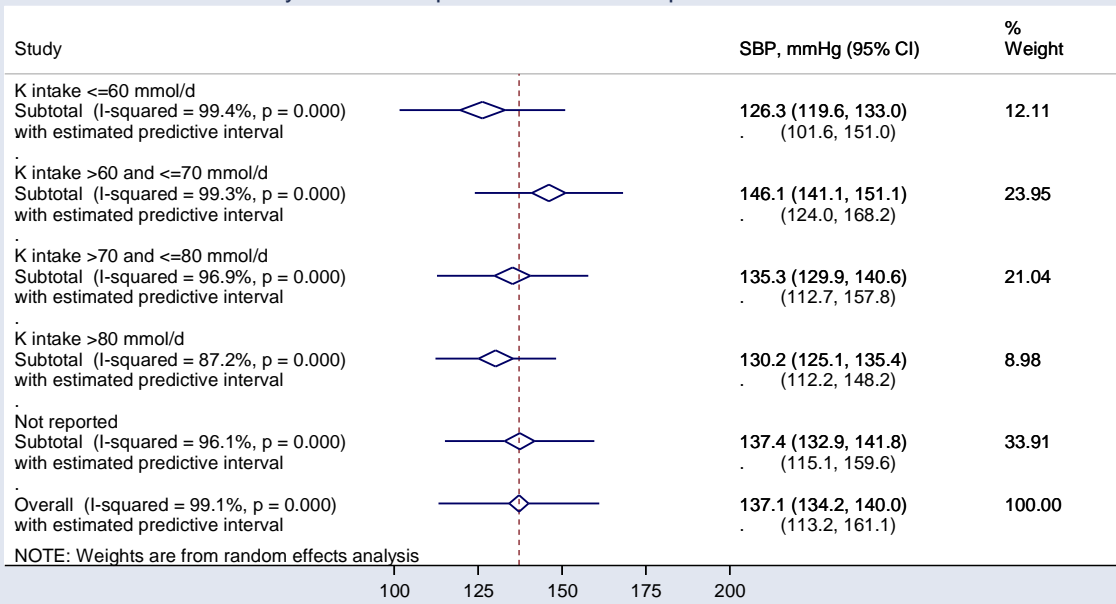

Systolic blood pressure - UNa excretion at baseline

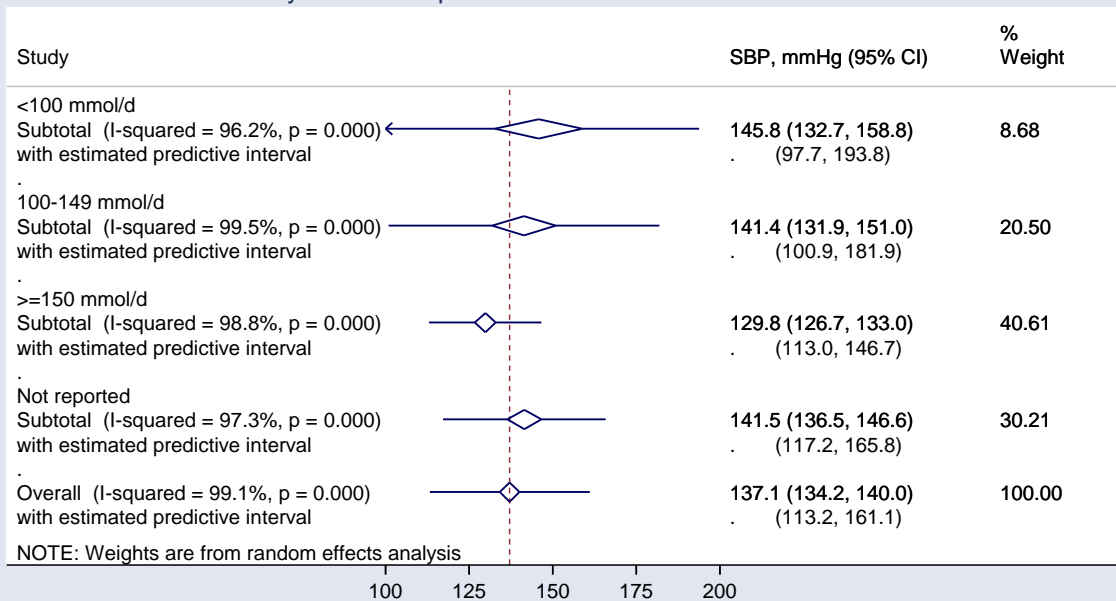

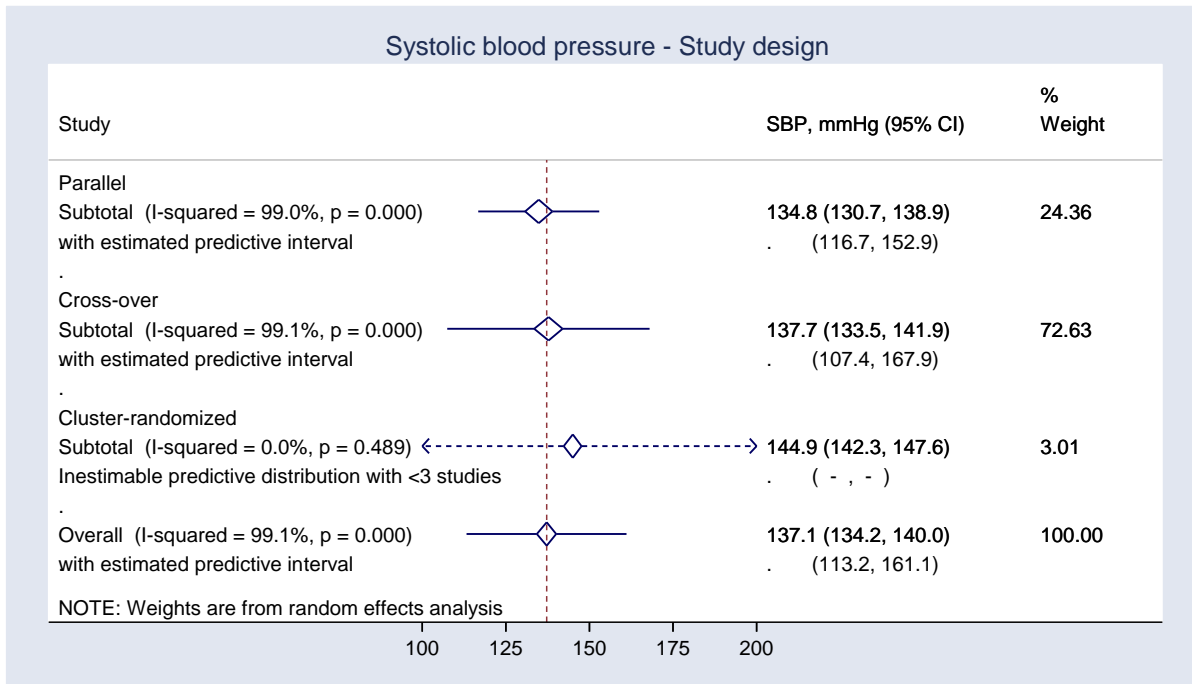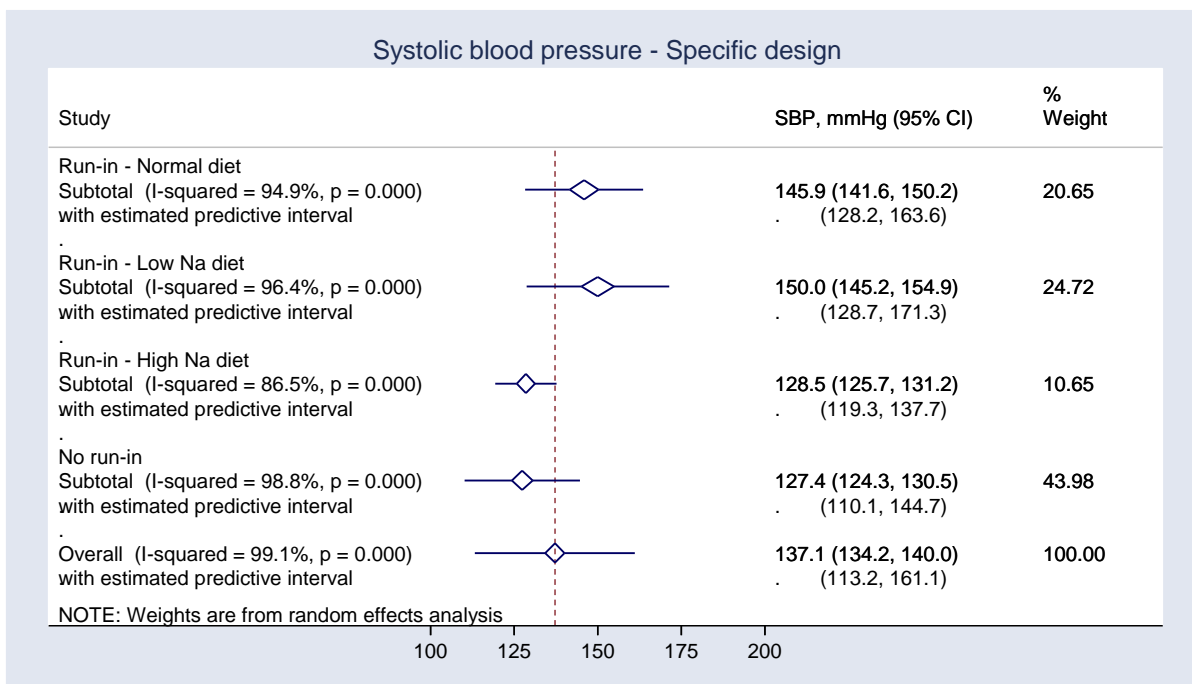

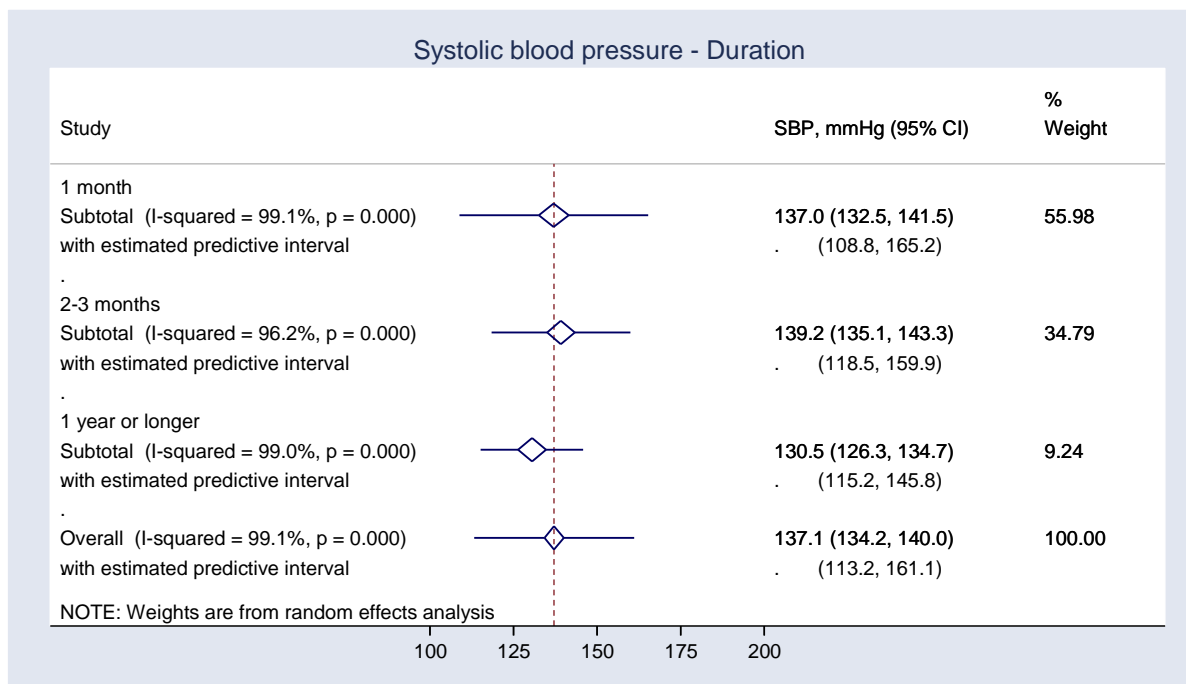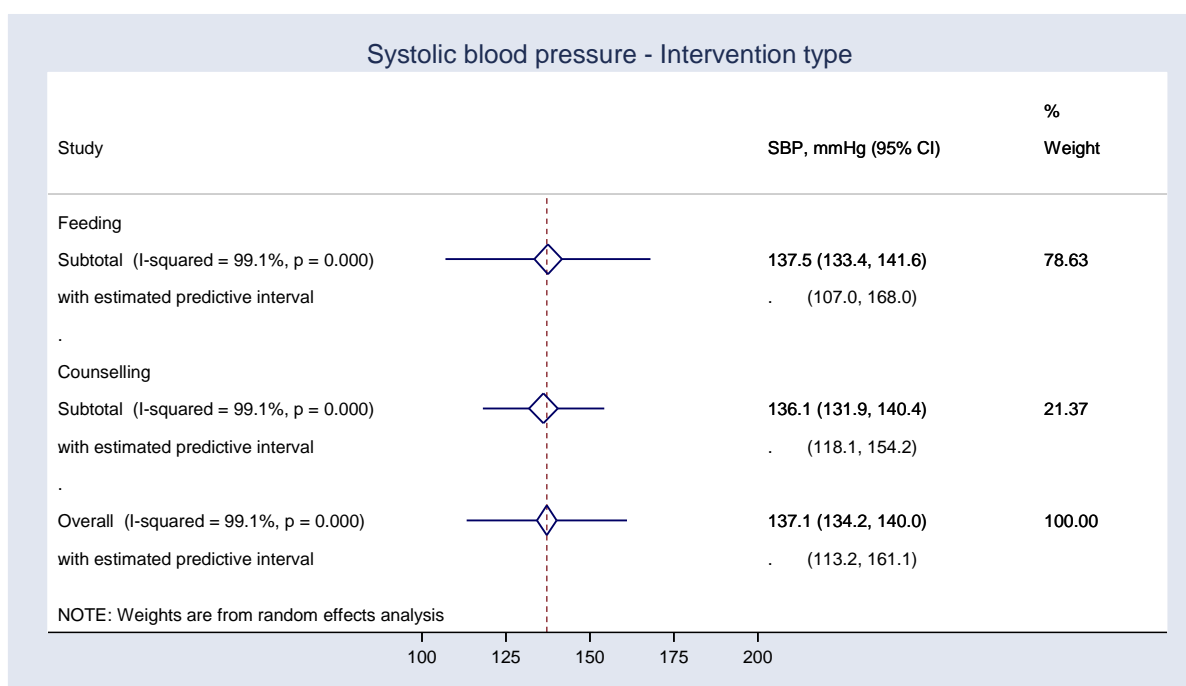

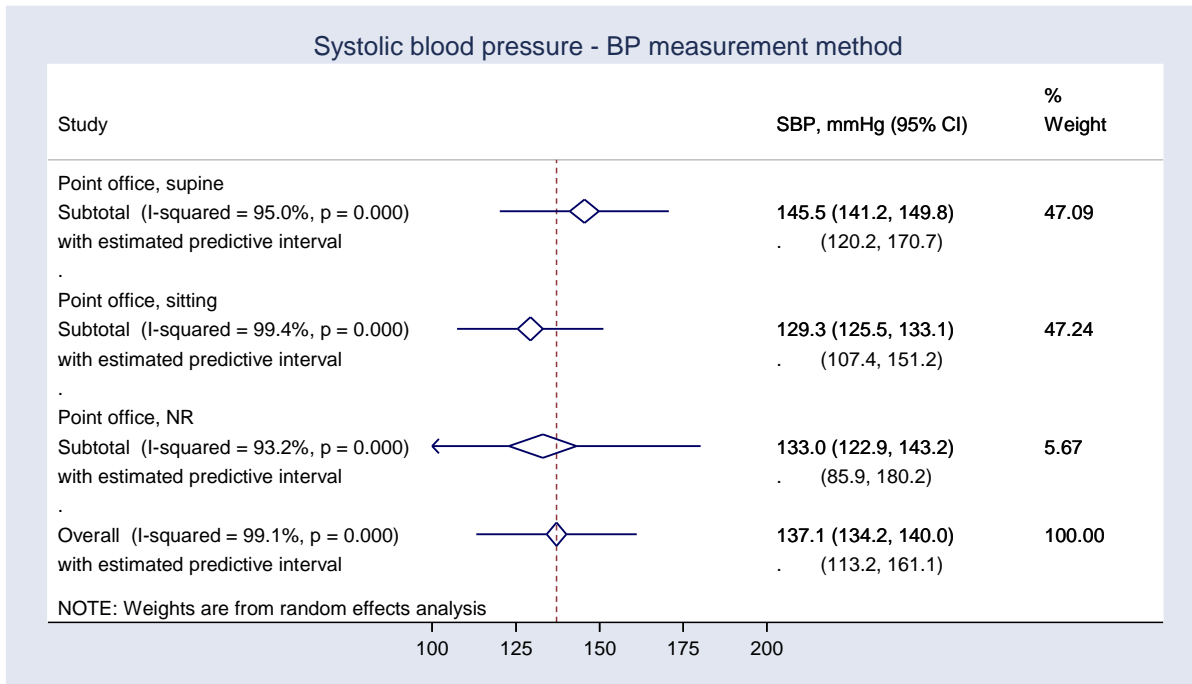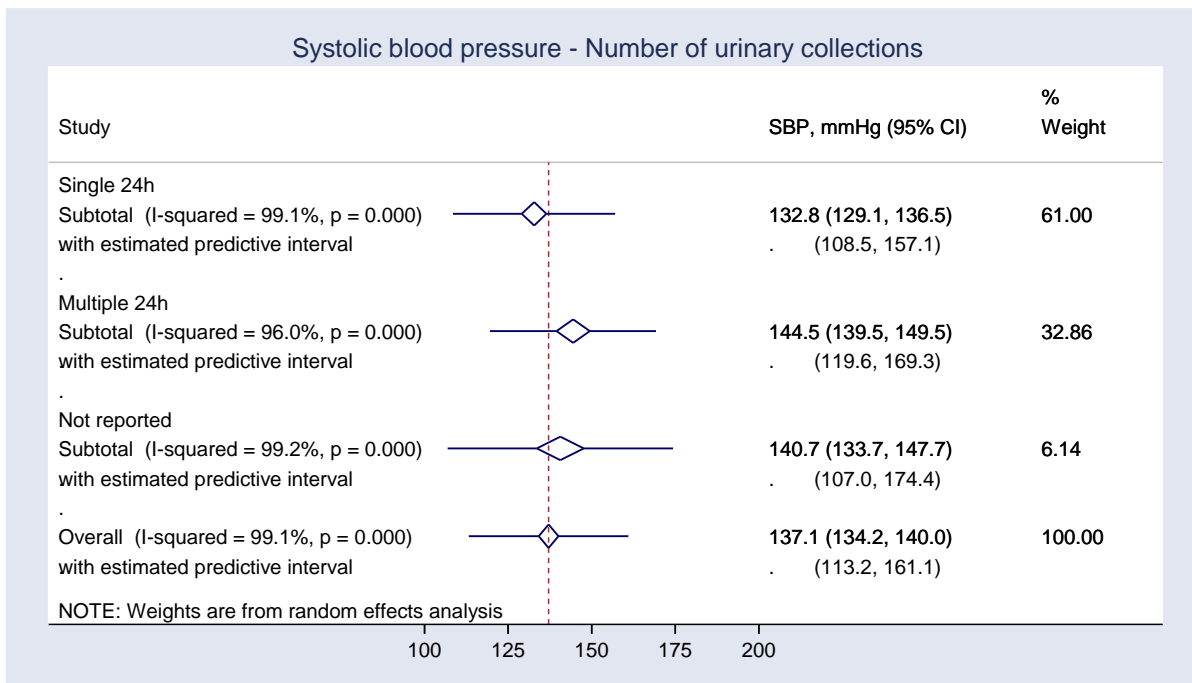

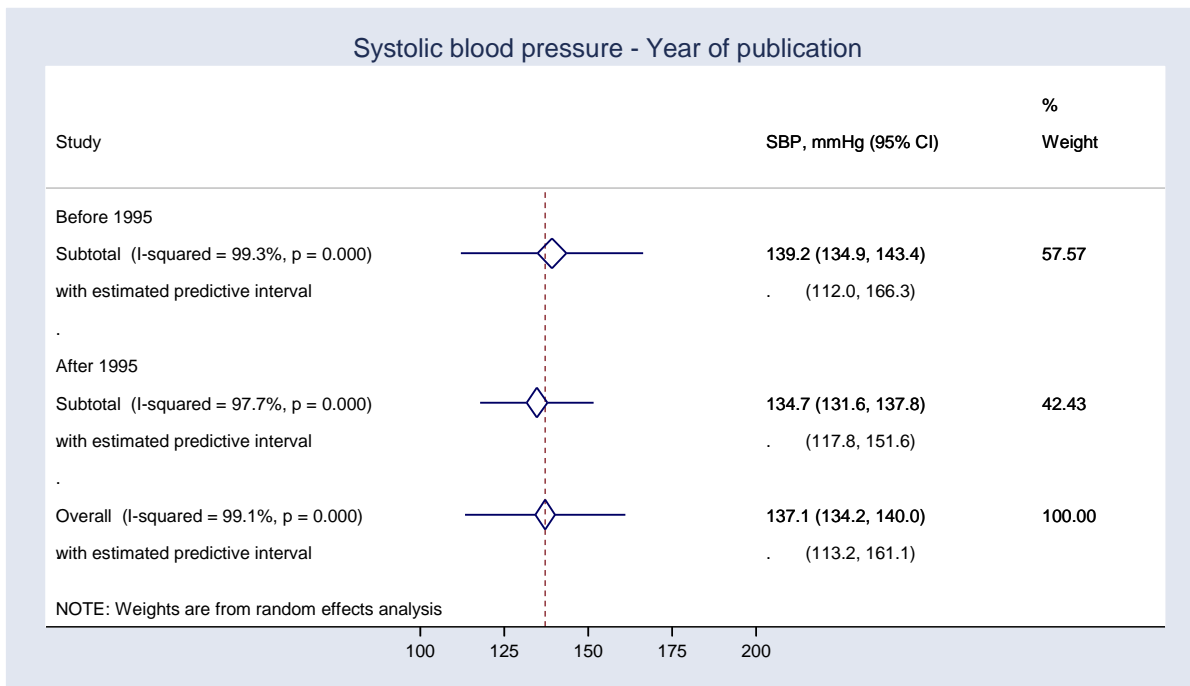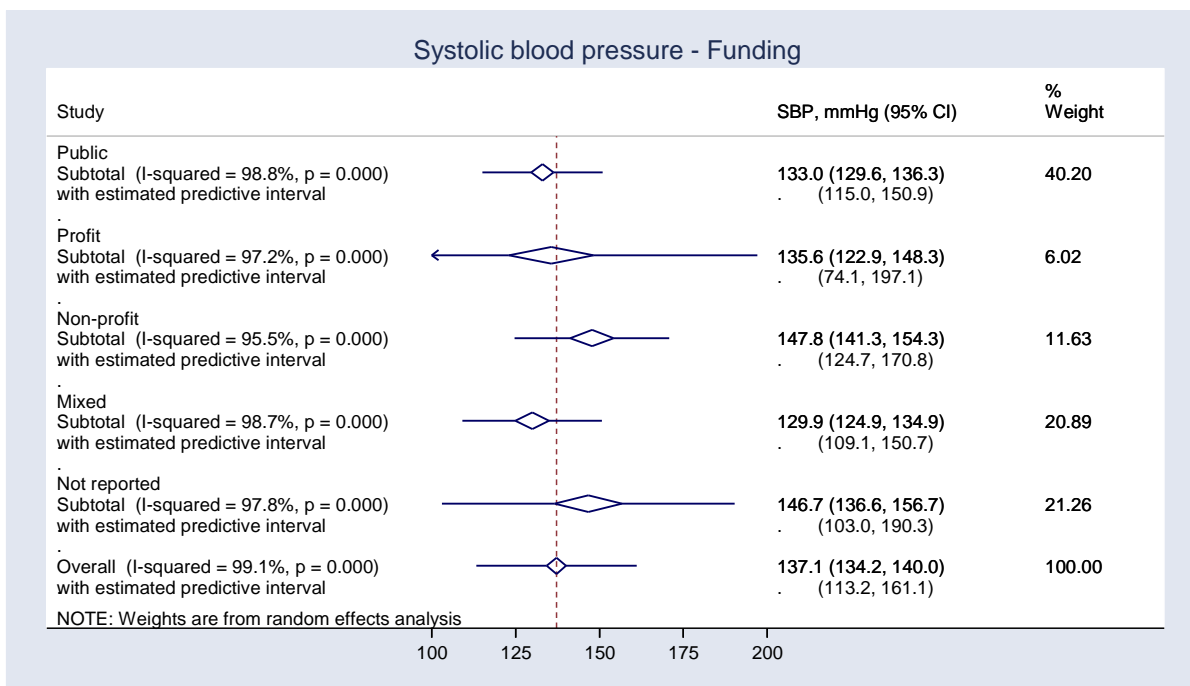

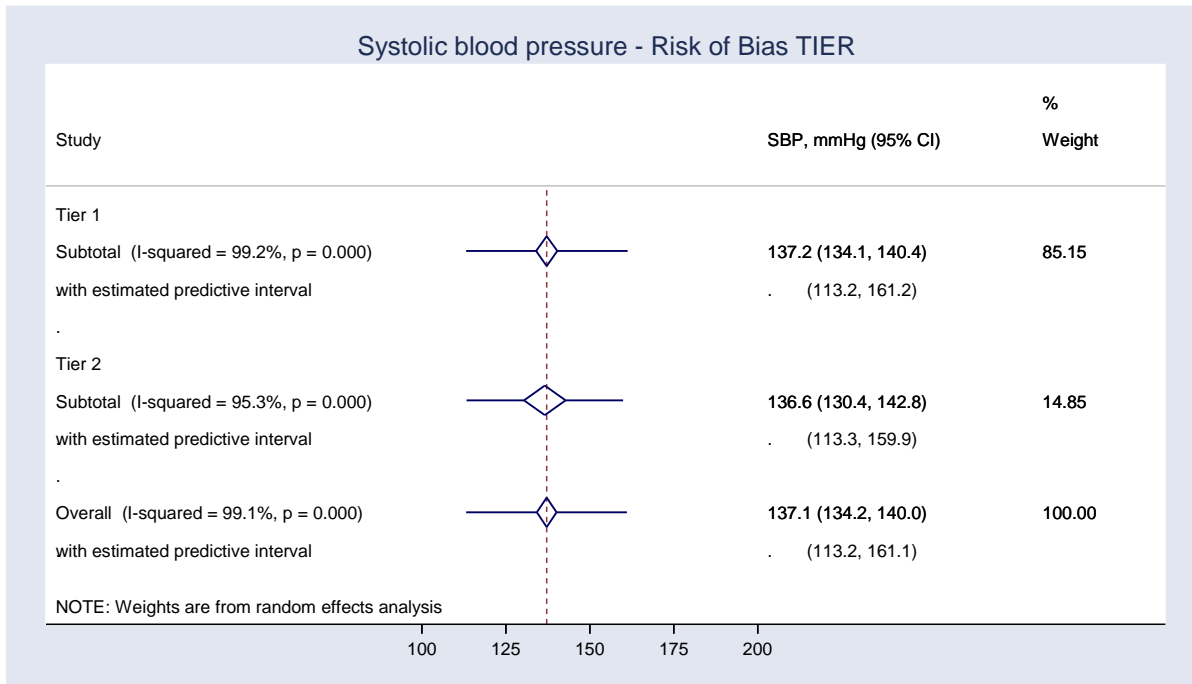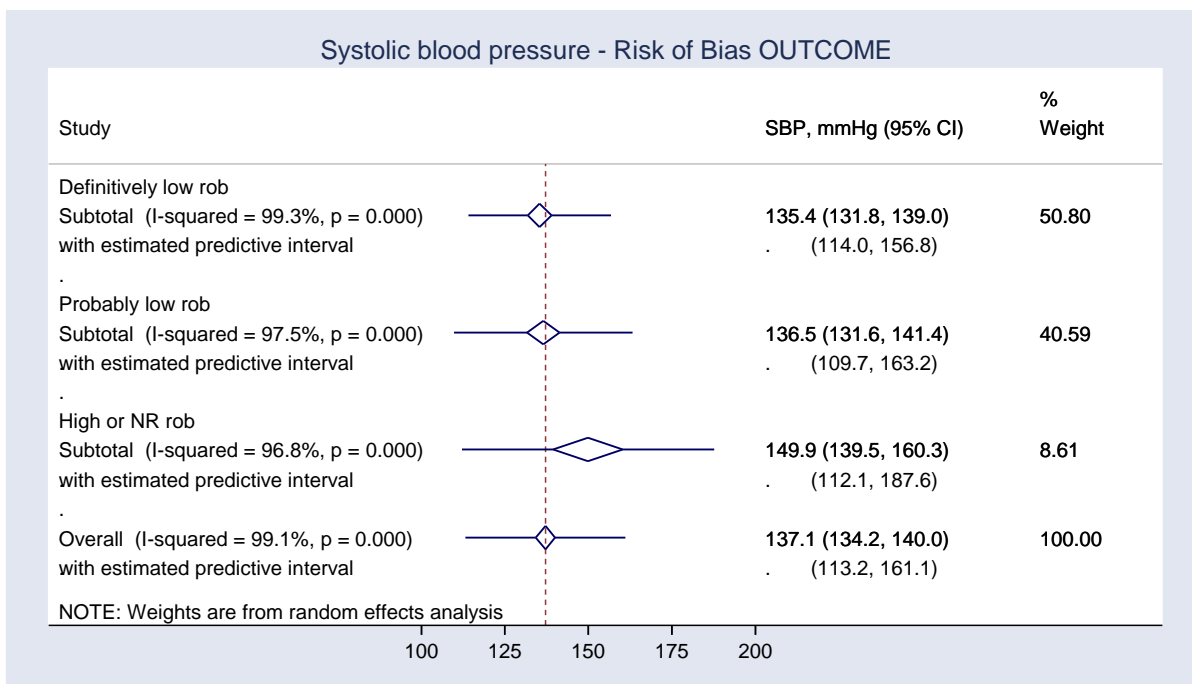



## Diastolic blood pressure - Overall (adults) by study

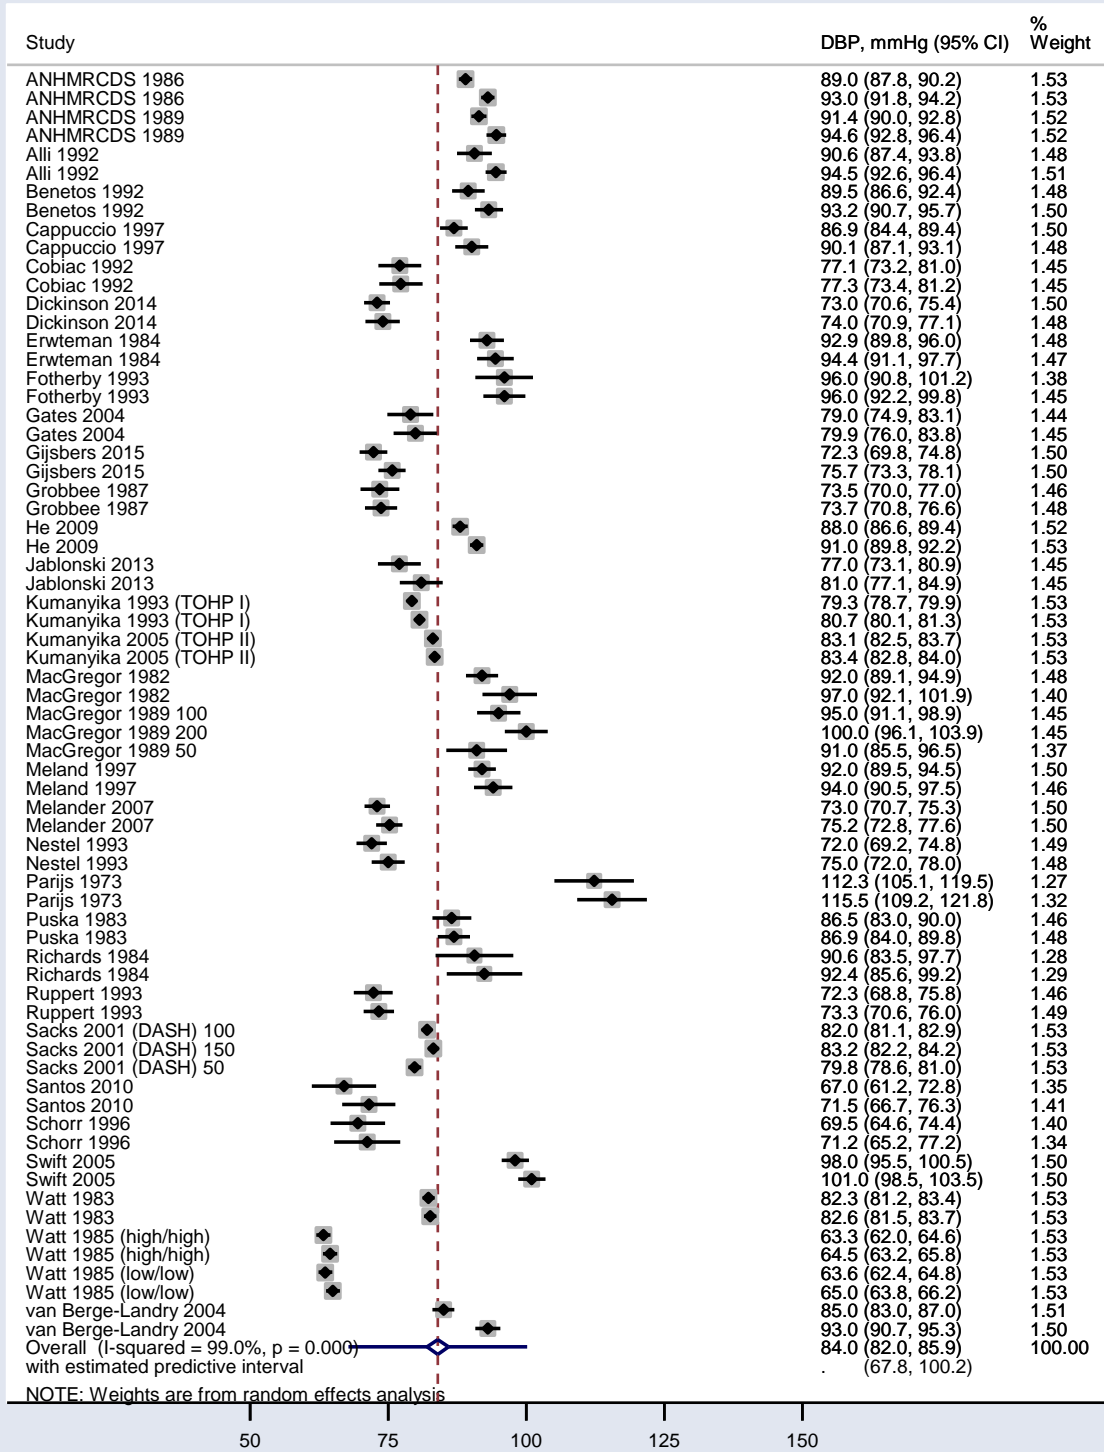

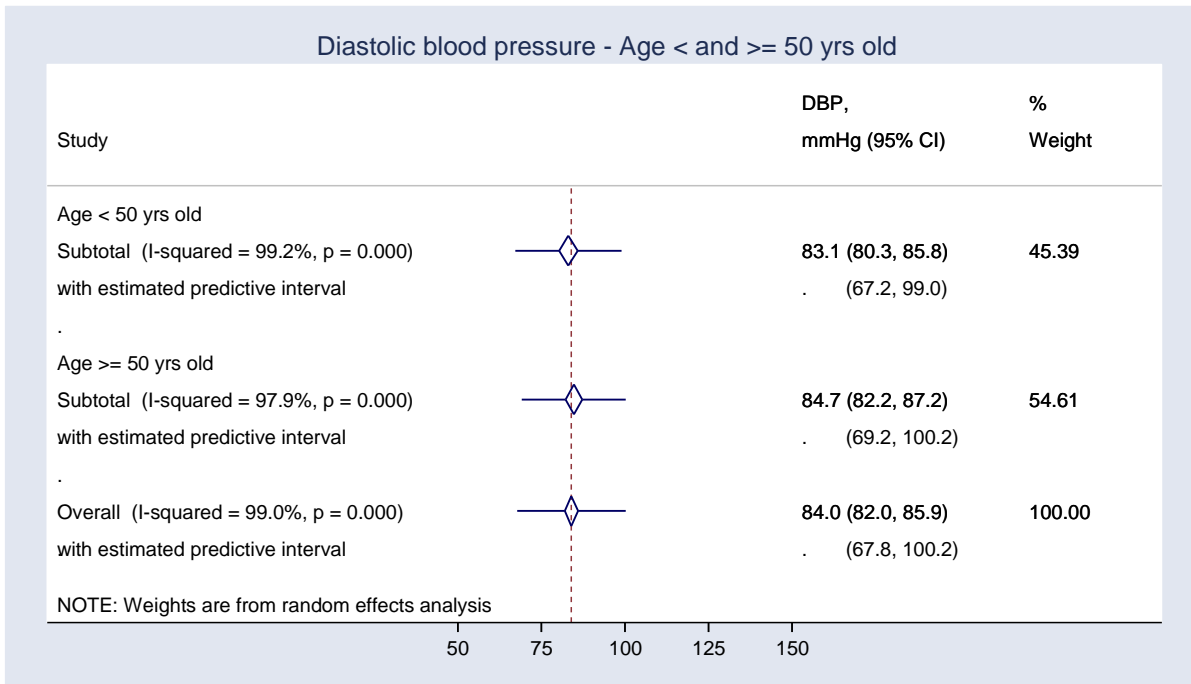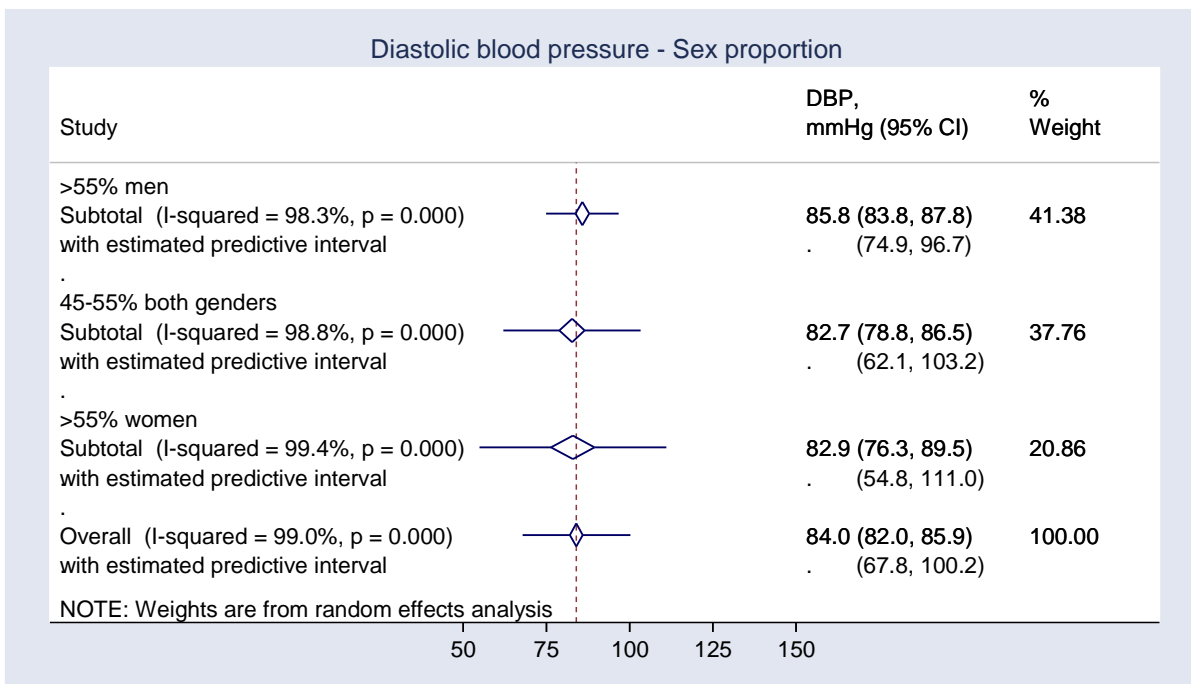

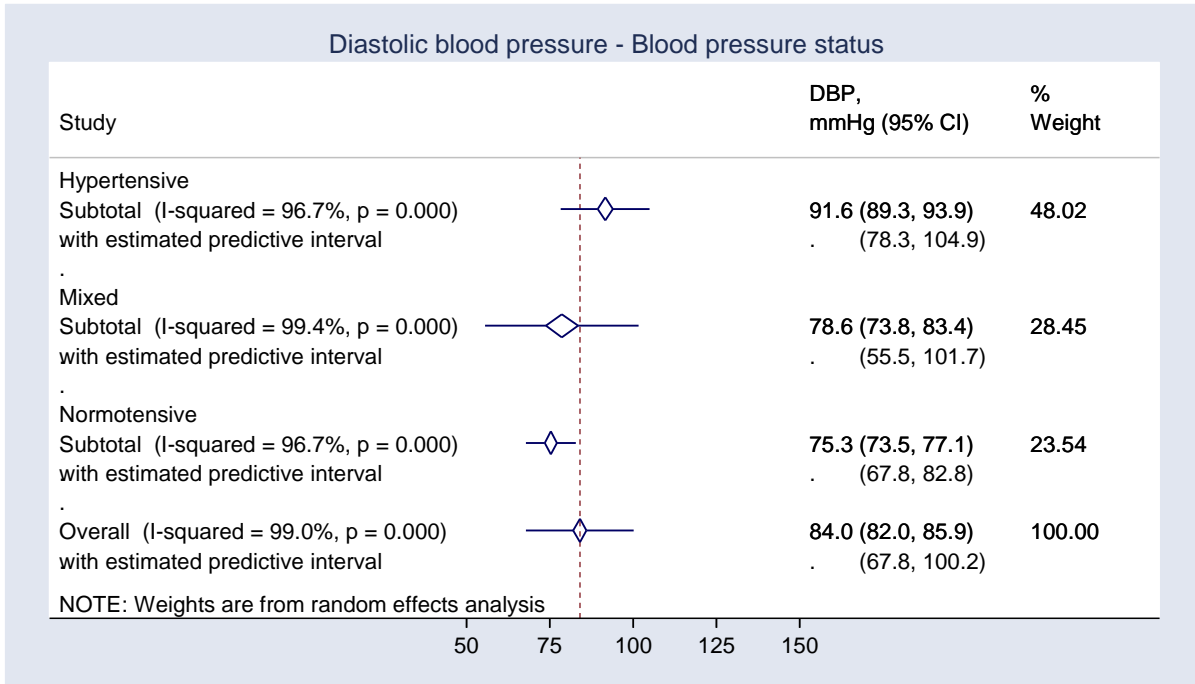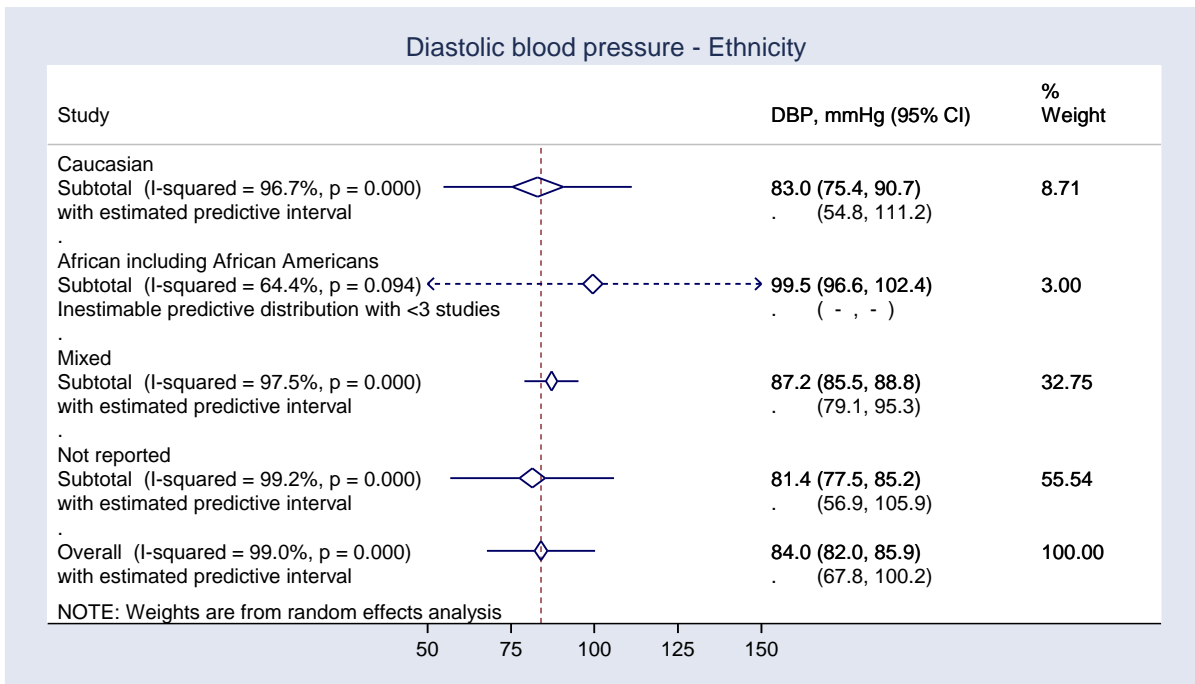

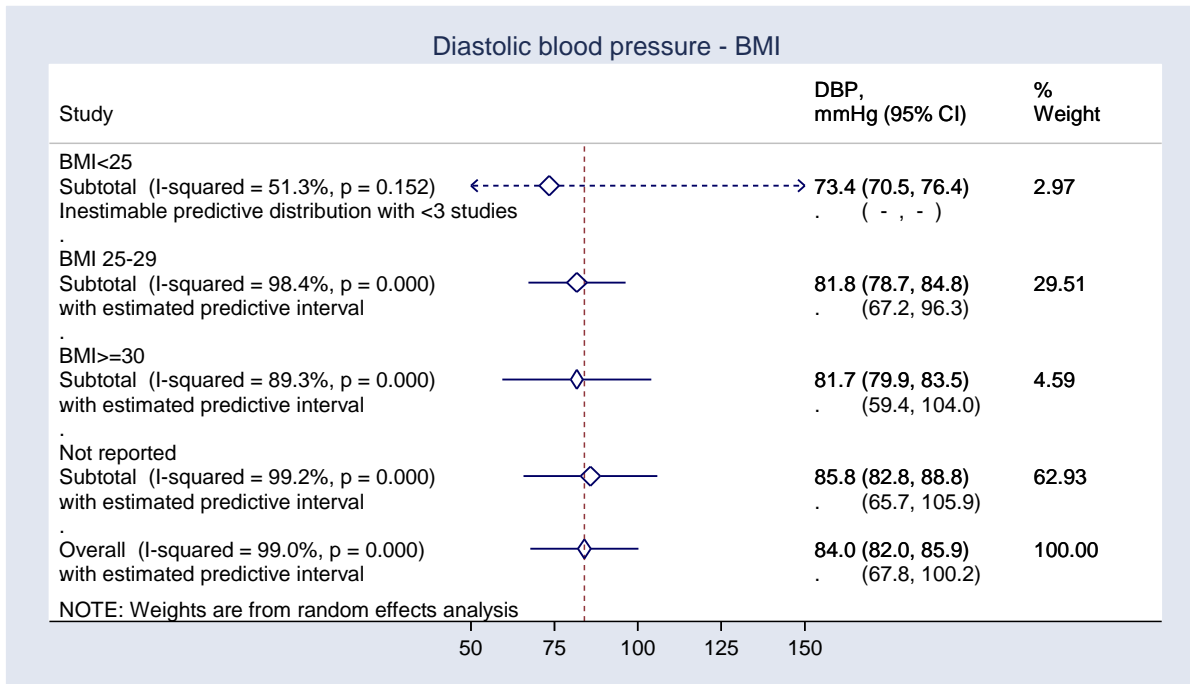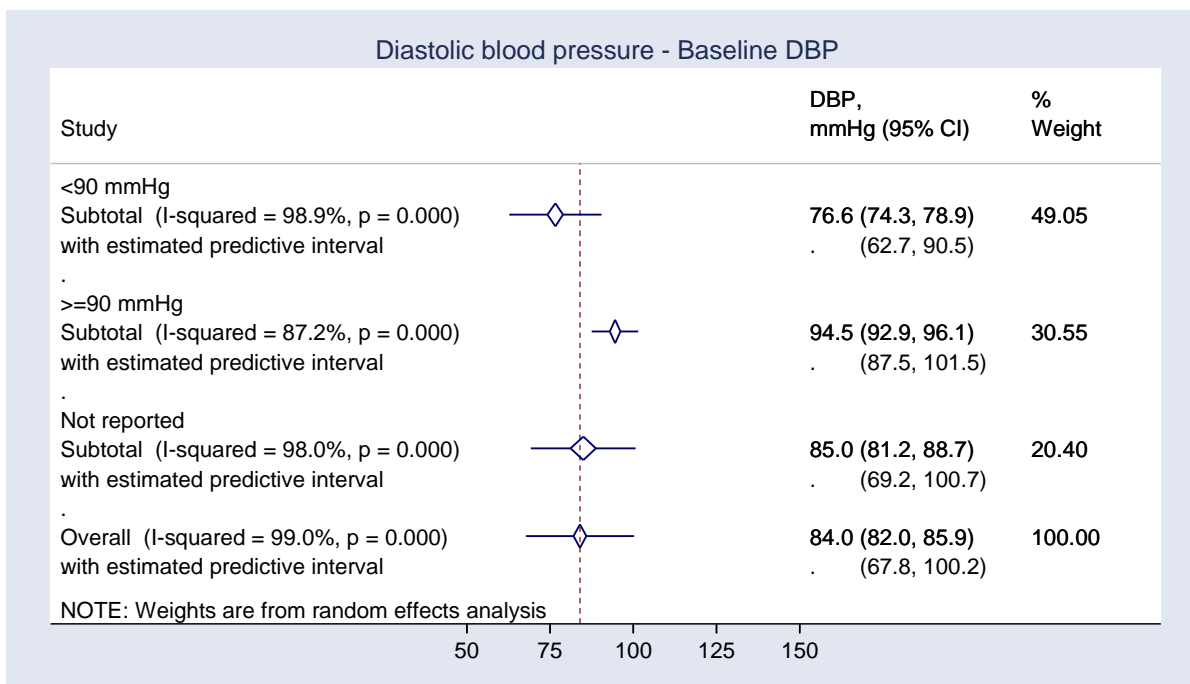

Diastolic blood pressure - Baseline potassium intake

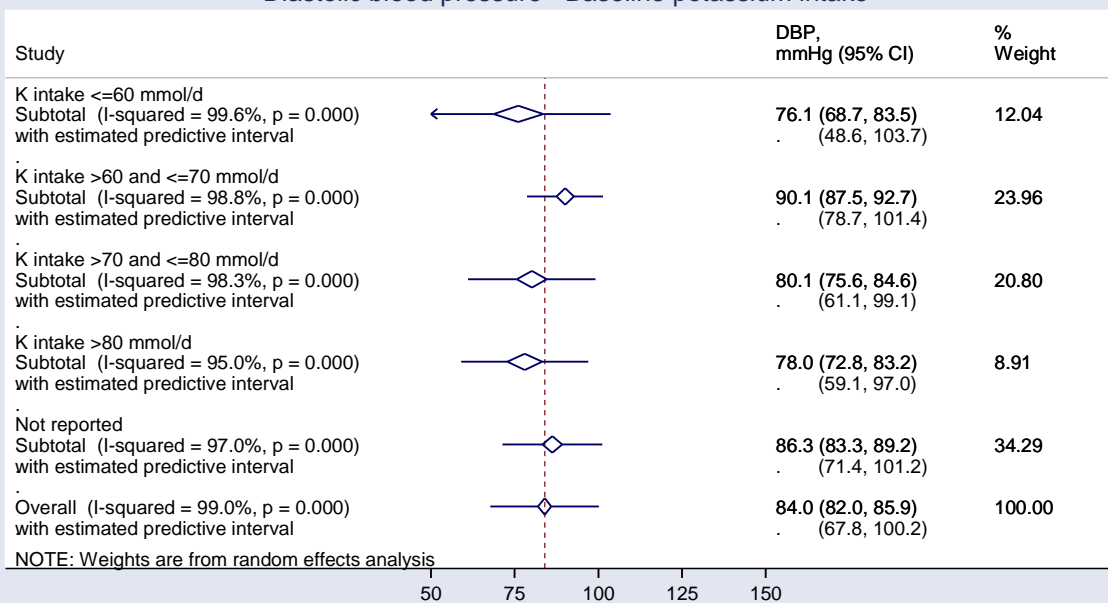

Diastolic blood pressure - UNa excretion at baseline

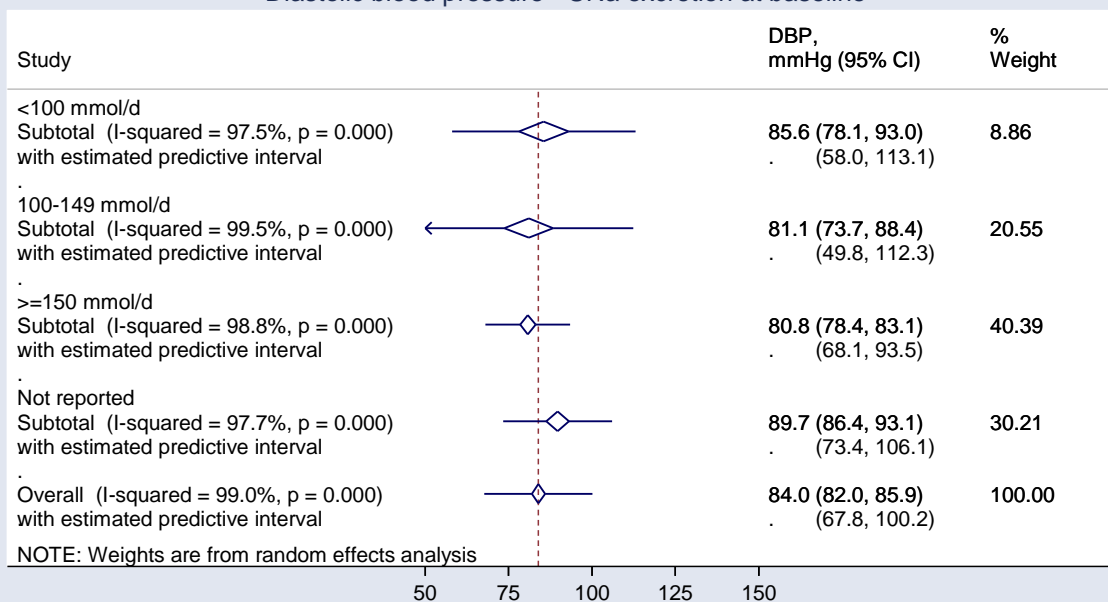

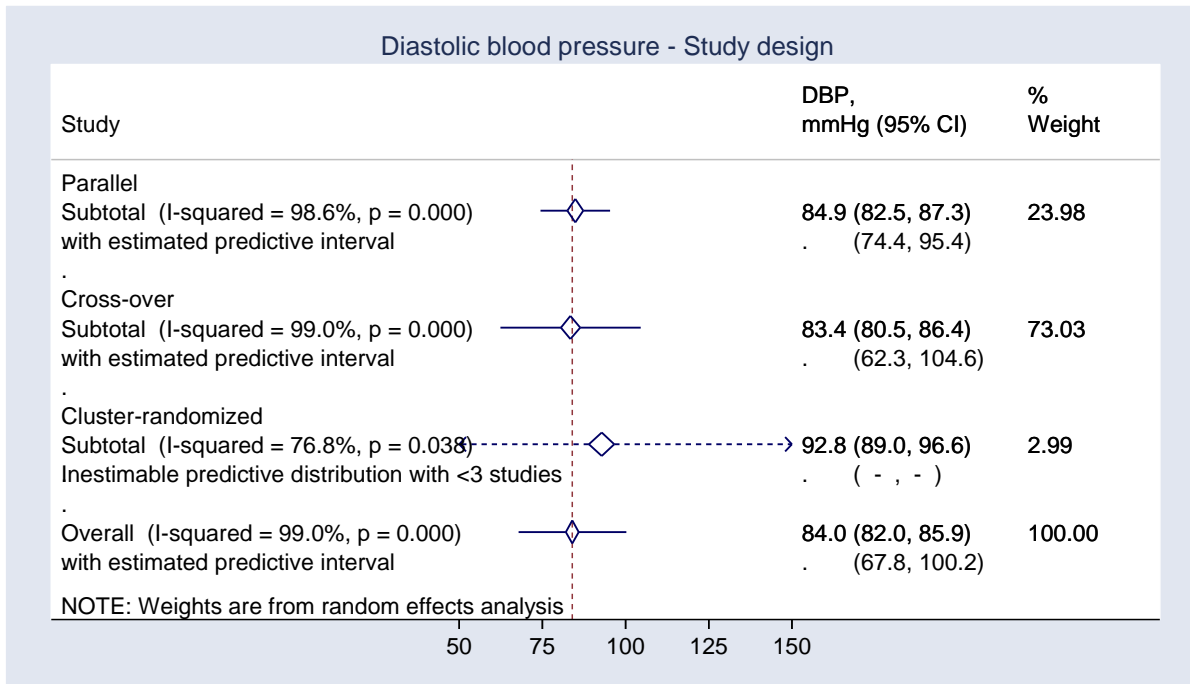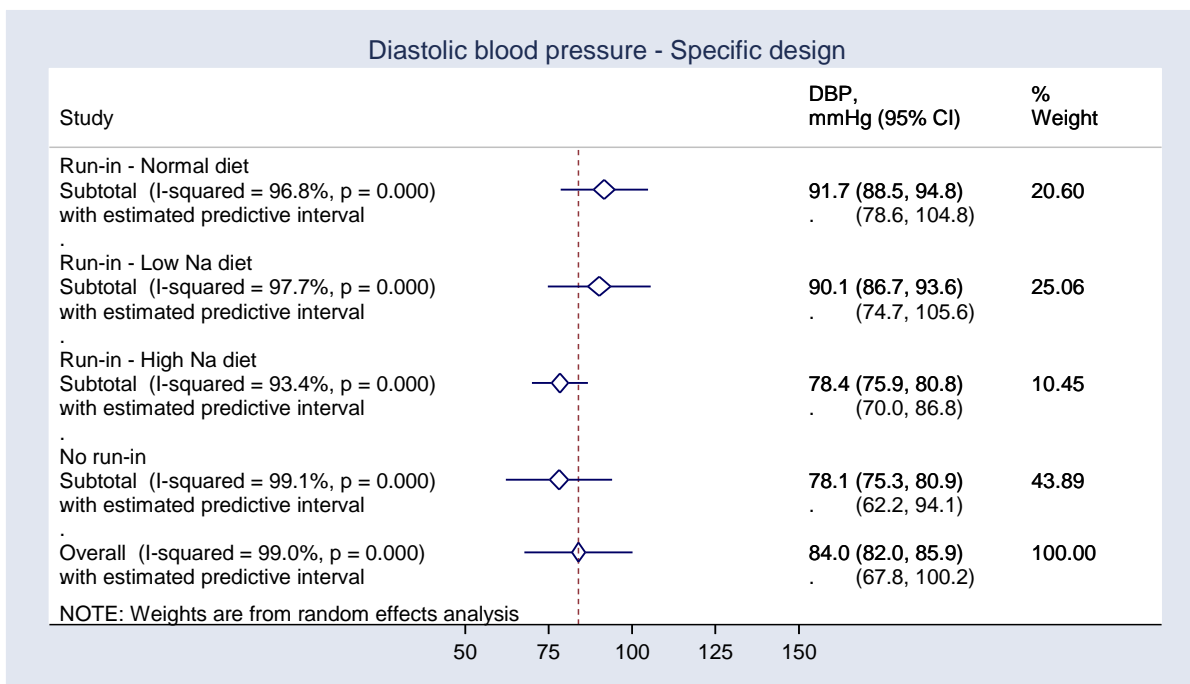

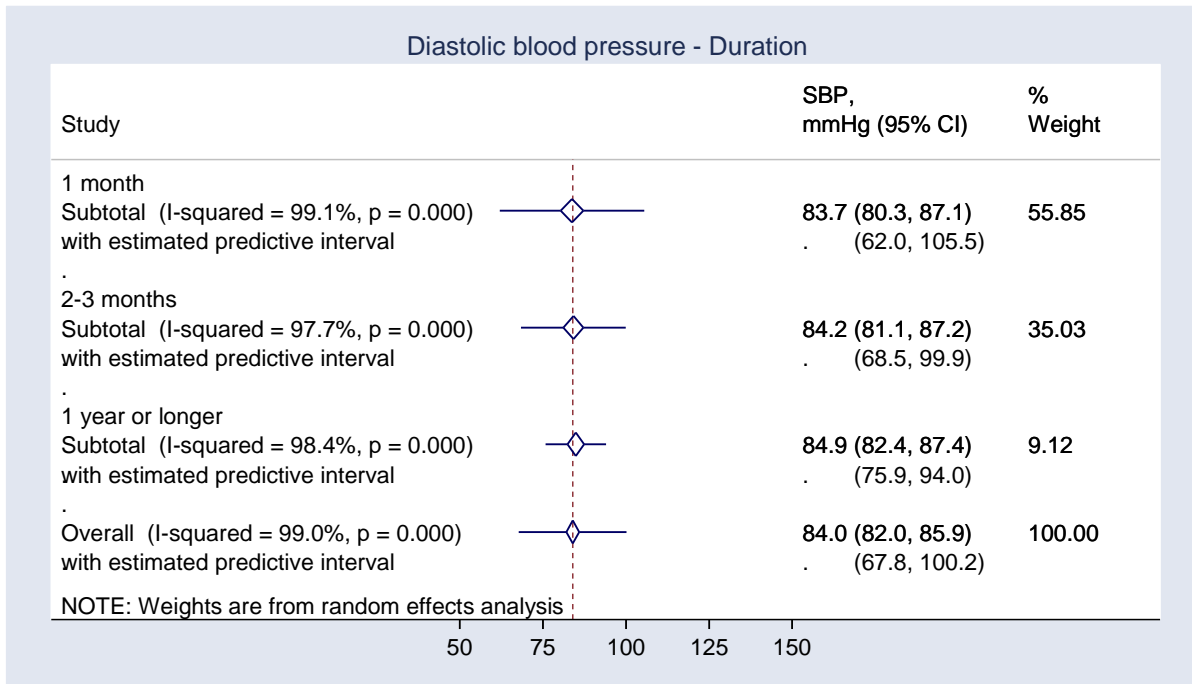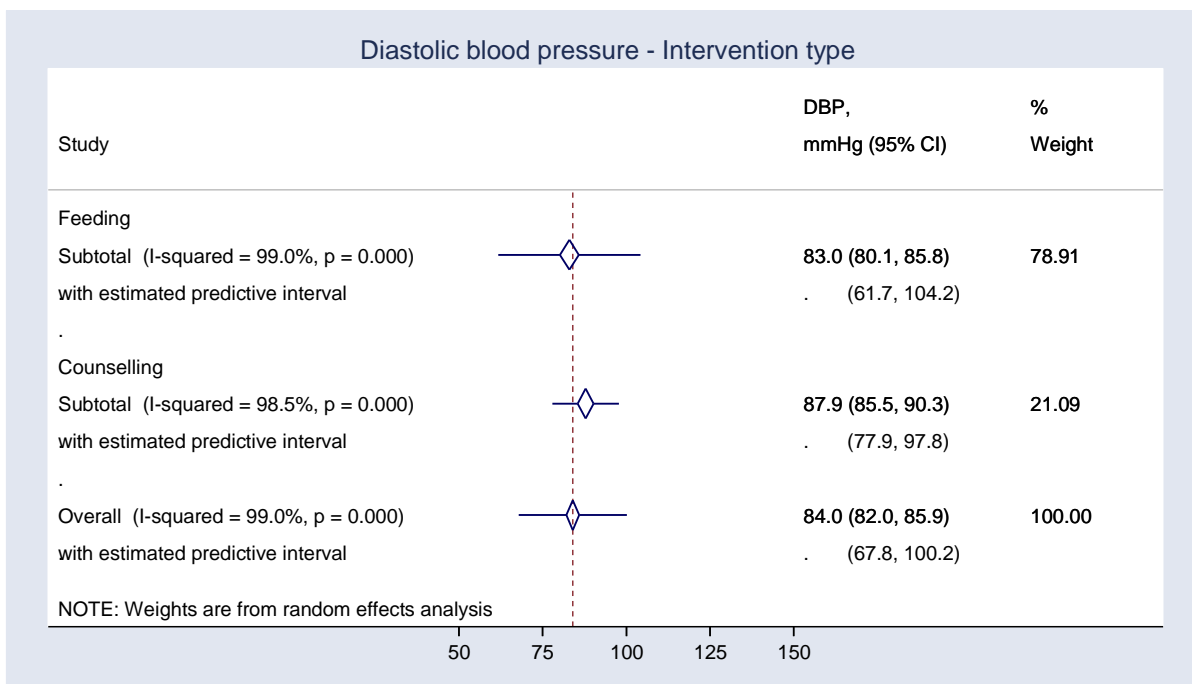

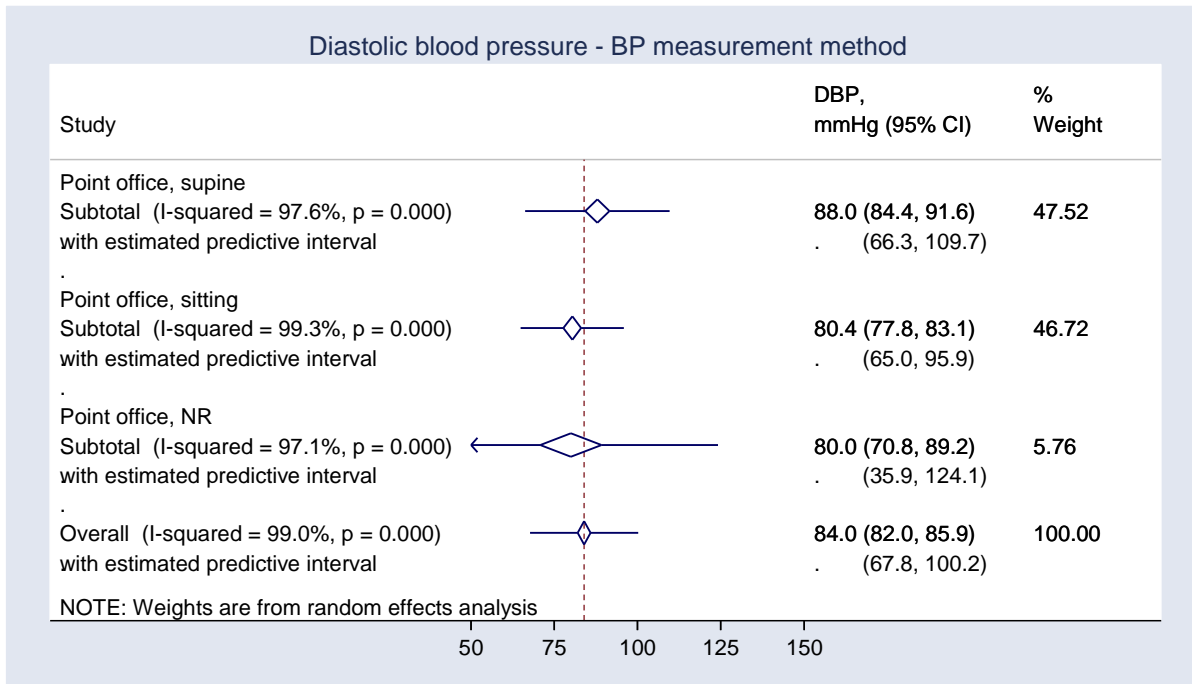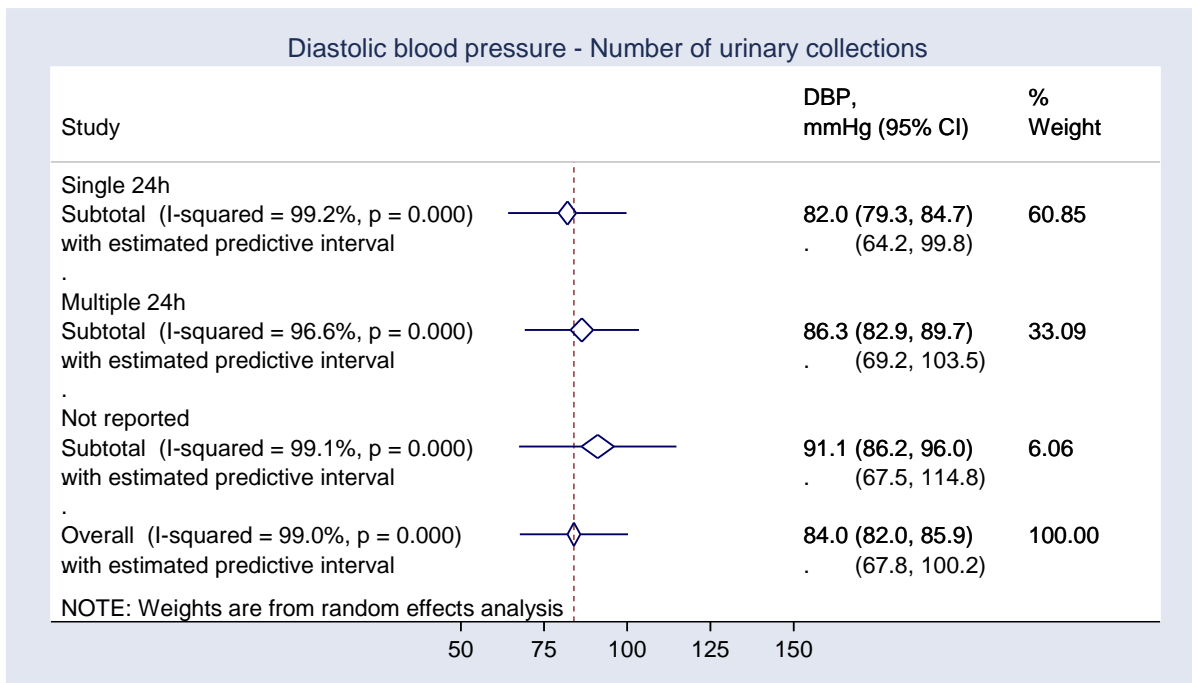



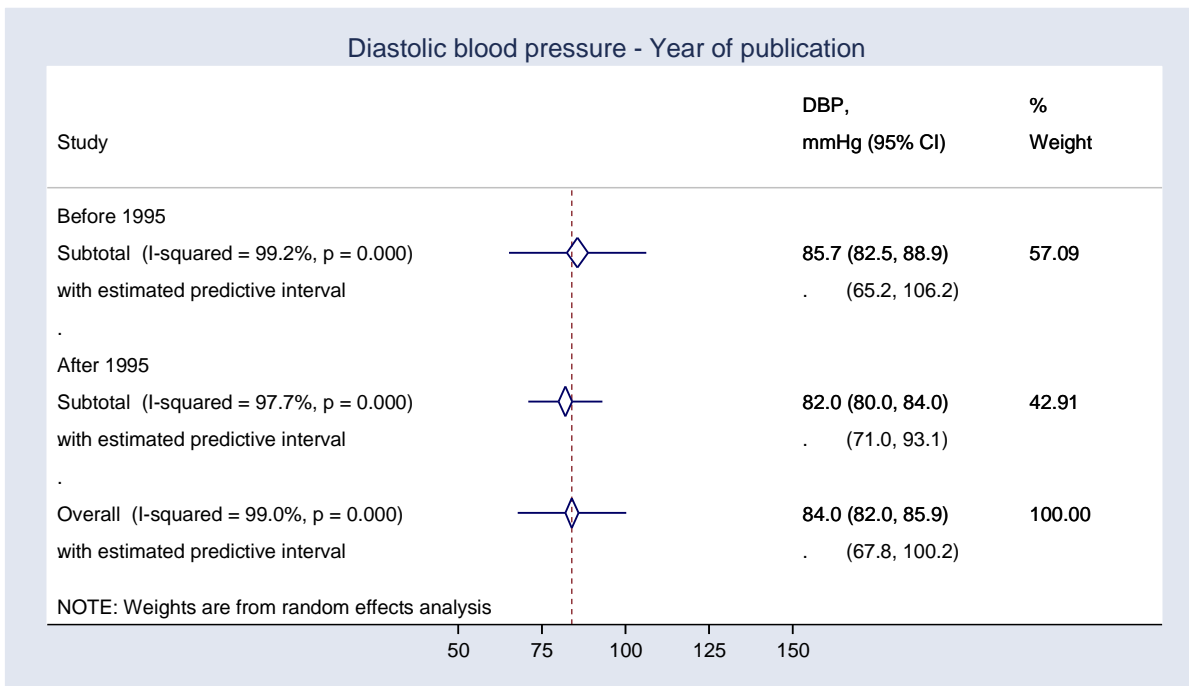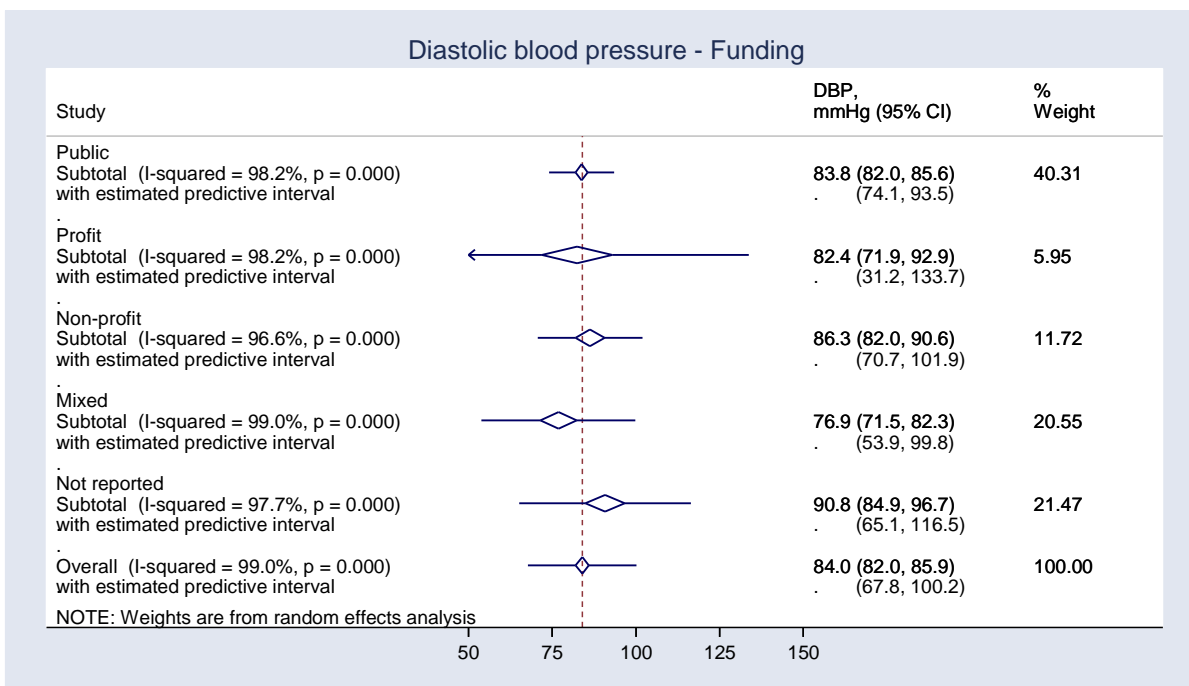

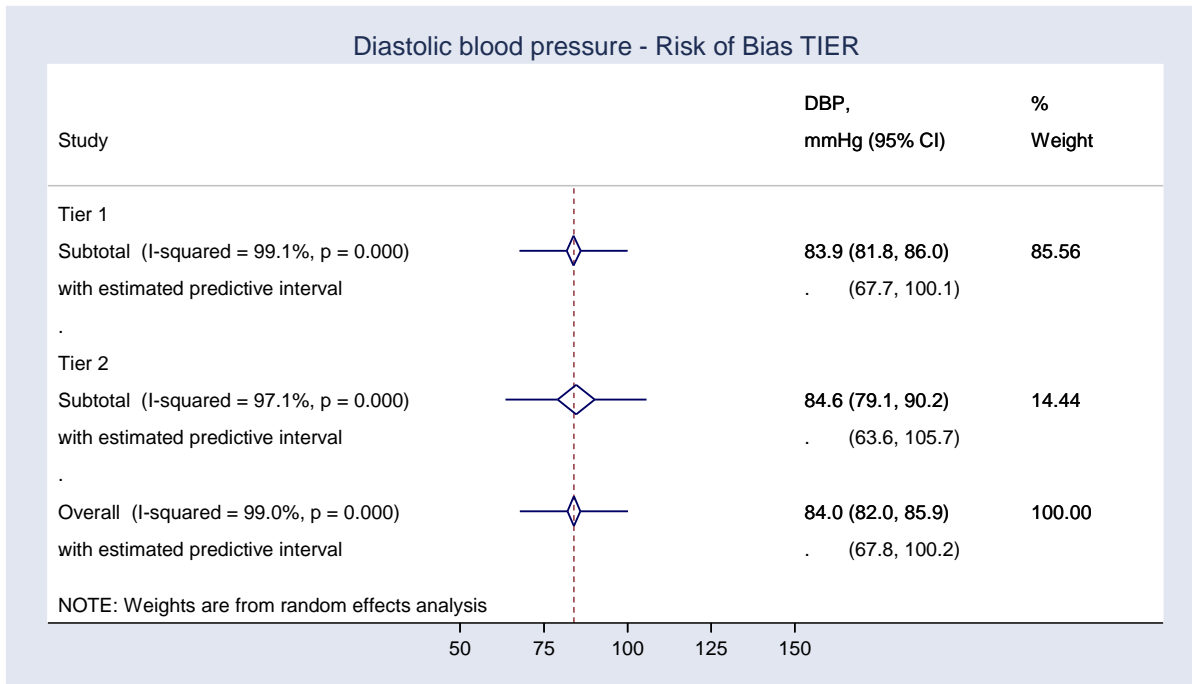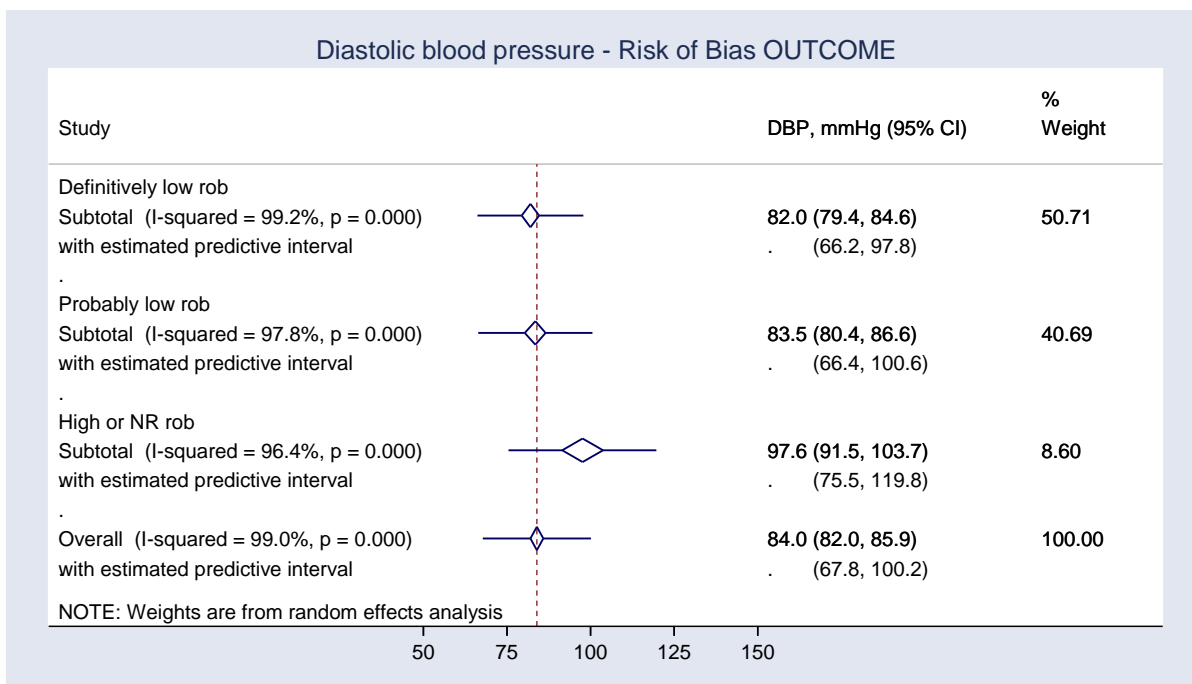

Supplement: EFS2-17-e05778-s002.pdf [file EFS2-17-e05778-s002.pdf]
